# Supplementary material
Source: publisher figshare collection journal article supplement (https://acs.figshare.com/ndownloader/files/4274420)
Supplement: Supplementary file 1 [file 4274420]

 
data_compound2a
 
_audit_creation_method                  'WinGX routine CIF_UPDATE'
_audit_conform_dict_name                cif_core.dic
_audit_conform_dict_version             2.3
_audit_conform_dict_location            ftp://ftp.iucr.org/pub/cif_core.dic
_publ_requested_category                FM
 
#----------------------------------------------------------------------------#
#                   CHEMICAL INFORMATION                                     #
#----------------------------------------------------------------------------#
 
_chemical_name_systematic
;
 ?
;
_chemical_formula_moiety                'C24 H21 Cr1 Fe2 O8 P1'
_chemical_formula_sum                   'C24 H21 Cr1 Fe2 O8 P1'
_chemical_formula_weight                632.08
_chemical_compound_source               'synthesis as described'
 
#----------------------------------------------------------------------------#
#                   UNIT CELL INFORMATION                                    #
#----------------------------------------------------------------------------#
 
_symmetry_cell_setting                  monoclinic
_symmetry_space_group_name_H-M          'P 1 21/c 1'
_symmetry_space_group_name_Hall         '-P 2ybc'
_symmetry_Int_Tables_number             14
loop_
    _symmetry_equiv_pos_as_xyz
'x, y, z'
'-x, y+1/2, -z+1/2'
'-x, -y, -z'
'x, -y-1/2, z-1/2'
 
_cell_length_a                          21.4980(7)
_cell_length_b                          14.5527(5)
_cell_length_c                          15.8604(5)
_cell_angle_alpha                       90
_cell_angle_beta                        93.547(2)
_cell_angle_gamma                       90
_cell_volume                            4952.5(3)
_cell_formula_units_Z                   8
_cell_measurement_temperature           100.0(1)
_cell_measurement_reflns_used           1803
_cell_measurement_theta_min             2.57
_cell_measurement_theta_max             26.025
_cell_measurement_wavelength            0.71073
 
#----------------------------------------------------------------------------#
#                   CRYSTAL INFORMATION                                      #
#----------------------------------------------------------------------------#
 
_exptl_crystal_description              plate
_exptl_crystal_colour                   red
_exptl_crystal_size_max                 0.35
_exptl_crystal_size_mid                 0.12
_exptl_crystal_size_min                 0.05
_exptl_crystal_density_diffrn           1.695
_exptl_crystal_density_method           'not measured'
_exptl_crystal_F_000                    2560
_exptl_special_details
;
 ?
;
 
#----------------------------------------------------------------------------#
#                   ABSORPTION CORRECTION                                    #
#----------------------------------------------------------------------------#
 
_exptl_absorpt_coefficient_mu           1.699
_exptl_absorpt_correction_type          multi-scan
_exptl_absorpt_process_details		'BRUKER Sadabs'
_exptl_absorpt_correction_T_min         0.7784
_exptl_absorpt_correction_T_max         0.92
 
#----------------------------------------------------------------------------#
#                   DATA COLLECTION                                          #
#----------------------------------------------------------------------------#
 
_diffrn_ambient_temperature             100.0(1)
_diffrn_radiation_wavelength            0.71073
_diffrn_radiation_source                'fine-focus sealed tube'
_diffrn_radiation_type                  MoK\a
_diffrn_radiation_monochromator         graphite
_diffrn_measurement_device              'four-circle diffractometer' 
_diffrn_measurement_device_type         'BRUKER APPEX-II CCD'
_diffrn_measurement_method              'omega/phi scans'
_diffrn_radiation_probe                 x-ray
_diffrn_reflns_av_R_equivalents         0.0556
_diffrn_reflns_av_unetI/netI            0.032
_diffrn_reflns_number                   67596
_diffrn_reflns_limit_h_min              -26
_diffrn_reflns_limit_h_max              26
_diffrn_reflns_limit_k_min              0
_diffrn_reflns_limit_k_max              18
_diffrn_reflns_limit_l_min              0
_diffrn_reflns_limit_l_max              19
_diffrn_reflns_theta_min                0.95
_diffrn_reflns_theta_max                26.42
_diffrn_reflns_theta_full               26.42
_diffrn_measured_fraction_theta_full
                                        0.998
_diffrn_measured_fraction_theta_max
                                        0.998
_reflns_number_total                    10149
_reflns_number_gt                       7984
_reflns_threshold_expression            >2sigma(I)
 
#----------------------------------------------------------------------------#
#                   COMPUTER PROGRAMS USED                                   #
#----------------------------------------------------------------------------#
 
_computing_data_collection              'BRUKER APEX'
_computing_cell_refinement              'BRUKER APEX'
_computing_structure_solution           'SHELXL-97 (Sheldrick, 1997)'
_computing_structure_refinement         'SHELXL-97 (Sheldrick, 1997)'
_computing_molecular_graphics           'Ortep-3 for Windows (Farrugia, 1997)'
_computing_publication_material
                                   'WinGX publication routines (Farrugia, 1999)'
 
#----------------------------------------------------------------------------#
#                   REFINEMENT INFORMATION                                   #
#----------------------------------------------------------------------------#
 
_refine_special_details
;
 Refinement of F^2^ against ALL reflections.  The weighted R-factor wR and
 goodness of fit S are based on F^2^, conventional R-factors R are based
 on F, with F set to zero for negative F^2^. The threshold expression of
 F^2^ > 2sigma(F^2^) is used only for calculating R-factors(gt) etc. and is
 not relevant to the choice of reflections for refinement.  R-factors based
 on F^2^ are statistically about twice as large as those based on F, and R-
 factors based on ALL data will be even larger.
;
_refine_ls_structure_factor_coef        Fsqd
_refine_ls_matrix_type                  full
_refine_ls_weighting_scheme             calc
_refine_ls_weighting_details
         'calc w=1/[\s^2^(Fo^2^)+(0.0150P)^2^+7.1684P] where P=(Fo^2^+2Fc^2^)/3'
_atom_sites_solution_primary            direct
_atom_sites_solution_secondary          difmap
_atom_sites_solution_hydrogens          geom
_refine_ls_hydrogen_treatment           constr
_refine_ls_extinction_method            none
_refine_ls_number_reflns                10149
_refine_ls_number_parameters            640
_refine_ls_number_restraints            0
_refine_ls_R_factor_all                 0.0472
_refine_ls_R_factor_gt                  0.0291
_refine_ls_wR_factor_ref                0.0619
_refine_ls_wR_factor_gt                 0.0553
_refine_ls_goodness_of_fit_ref          1.036
_refine_ls_restrained_S_all             1.036
_refine_ls_shift/su_max                 0.002
_refine_ls_shift/su_mean                0
_refine_diff_density_max                0.88
_refine_diff_density_min                -0.628
_refine_diff_density_rms                0.077
 
#----------------------------------------------------------------------------#
#                   ATOMIC TYPES, COORDINATES AND THERMAL PARAMETERS         #
#----------------------------------------------------------------------------#
 
loop_
    _atom_type_symbol
    _atom_type_description
    _atom_type_scat_dispersion_real
    _atom_type_scat_dispersion_imag
    _atom_type_scat_source
C C 0.0033 0.0016 'International Tables Vol C Tables 4.2.6.8 and 6.1.1.4'
H H 0 0 'International Tables Vol C Tables 4.2.6.8 and 6.1.1.4'
Cr Cr 0.3209 0.6236 'International Tables Vol C Tables 4.2.6.8 and 6.1.1.4'
Fe Fe 0.3463 0.8444 'International Tables Vol C Tables 4.2.6.8 and 6.1.1.4'
O O 0.0106 0.006 'International Tables Vol C Tables 4.2.6.8 and 6.1.1.4'
P P 0.1023 0.0942 'International Tables Vol C Tables 4.2.6.8 and 6.1.1.4'
 
loop_
    _atom_site_label
    _atom_site_type_symbol
    _atom_site_fract_x
    _atom_site_fract_y
    _atom_site_fract_z
    _atom_site_U_iso_or_equiv
    _atom_site_adp_type
    _atom_site_occupancy
    _atom_site_symmetry_multiplicity
    _atom_site_calc_flag
    _atom_site_refinement_flags
    _atom_site_disorder_assembly
    _atom_site_disorder_group
Fe1 Fe 0.238496(16) 0.94511(2) 0.20271(2) 0.01197(8) Uani 1 1 d . . .
Fe2 Fe 0.134128(16) 1.01159(2) 0.13483(2) 0.01293(8) Uani 1 1 d . . .
Cr1 Cr 0.095590(18) 0.76730(3) 0.27407(2) 0.01427(9) Uani 1 1 d . . .
P1 P 0.14219(3) 0.92069(4) 0.25238(4) 0.01156(13) Uani 1 1 d . . .
O1 O 0.27732(8) 1.06403(13) 0.34314(11) 0.0224(4) Uani 1 1 d . . .
O2 O 0.10823(9) 1.17784(12) 0.22689(12) 0.0234(4) Uani 1 1 d . . .
O3 O 0.24793(8) 1.10839(12) 0.09918(11) 0.0197(4) Uani 1 1 d . . .
O4 O 0.06451(9) 0.56682(13) 0.28943(13) 0.0302(5) Uani 1 1 d . . .
O5 O 0.21302(9) 0.72677(13) 0.38465(12) 0.0260(4) Uani 1 1 d . . .
O6 O -0.02830(9) 0.83352(15) 0.19218(14) 0.0352(5) Uani 1 1 d . . .
O7 O 0.13175(9) 0.70417(13) 0.10105(12) 0.0266(4) Uani 1 1 d . . .
O8 O 0.02952(9) 0.78278(14) 0.43726(12) 0.0302(5) Uani 1 1 d . . .
C1 C 0.25875(11) 1.01870(17) 0.28799(16) 0.0163(5) Uani 1 1 d . . .
C2 C 0.12044(11) 1.10994(18) 0.19494(16) 0.0167(5) Uani 1 1 d . . .
C3 C 0.21959(11) 1.05045(17) 0.13139(15) 0.0155(5) Uani 1 1 d . . .
C4 C 0.07416(12) 0.64447(19) 0.28367(17) 0.0214(6) Uani 1 1 d . . .
C5 C 0.17008(12) 0.74240(17) 0.34047(16) 0.0174(5) Uani 1 1 d . . .
C6 C 0.01857(13) 0.80831(18) 0.22125(17) 0.0223(6) Uani 1 1 d . . .
C7 C 0.12168(11) 0.73079(17) 0.16684(16) 0.0176(5) Uani 1 1 d . . .
C8 C 0.05626(12) 0.78381(18) 0.37660(17) 0.0216(6) Uani 1 1 d . . .
C9 C 0.31379(12) 0.85951(18) 0.23952(16) 0.0187(6) Uani 1 1 d . . .
H9 H 0.3301 0.855 0.295 0.022 Uiso 1 1 calc R . .
C10 C 0.26646(12) 0.80407(17) 0.20150(17) 0.0193(6) Uani 1 1 d . . .
H10 H 0.2464 0.7559 0.2273 0.023 Uiso 1 1 calc R . .
C11 C 0.25464(12) 0.83393(18) 0.11781(17) 0.0217(6) Uani 1 1 d . . .
H11 H 0.225 0.8096 0.0788 0.026 Uiso 1 1 calc R . .
C12 C 0.29552(12) 0.90724(18) 0.10328(16) 0.0209(6) Uani 1 1 d . . .
H12 H 0.2977 0.9392 0.0527 0.025 Uiso 1 1 calc R . .
C13 C 0.33248(11) 0.92402(18) 0.17819(16) 0.0188(6) Uani 1 1 d . . .
H13 H 0.3632 0.9687 0.1862 0.023 Uiso 1 1 calc R . .
C14 C 0.12749(13) 0.9438(2) 0.01427(16) 0.0303(7) Uani 1 1 d . . .
H14 H 0.1576 0.9052 -0.0062 0.036 Uiso 1 1 calc R . .
C15 C 0.12433(15) 1.0388(2) 0.00337(17) 0.0358(8) Uani 1 1 d . . .
H15 H 0.1519 1.0745 -0.0255 0.043 Uiso 1 1 calc R . .
C16 C 0.07265(15) 1.0708(2) 0.04323(18) 0.0329(8) Uani 1 1 d . . .
H16 H 0.0594 1.1316 0.0449 0.04 Uiso 1 1 calc R . .
C17 C 0.04368(12) 0.9948(2) 0.08084(16) 0.0232(6) Uani 1 1 d . . .
H17 H 0.0087 0.9968 0.1125 0.028 Uiso 1 1 calc R . .
C18 C 0.07764(12) 0.91641(19) 0.06130(16) 0.0216(6) Uani 1 1 d . . .
H18 H 0.0687 0.8565 0.0769 0.026 Uiso 1 1 calc R . .
C19 C 0.12987(11) 0.99553(17) 0.34624(14) 0.0136(5) Uani 1 1 d . . .
H19 H 0.1516 1.0534 0.3366 0.016 Uiso 1 1 calc R . .
C20 C 0.15746(12) 0.95784(18) 0.43056(15) 0.0172(5) Uani 1 1 d . . .
H20A H 0.201 0.9425 0.4257 0.021 Uiso 1 1 calc R . .
H20B H 0.1355 0.9023 0.445 0.021 Uiso 1 1 calc R . .
C21 C 0.15155(12) 1.0301(2) 0.50010(16) 0.0229(6) Uani 1 1 d . . .
H21A H 0.167 1.0046 0.5539 0.027 Uiso 1 1 calc R . .
H21B H 0.177 1.0829 0.4882 0.027 Uiso 1 1 calc R . .
C22 C 0.08427(13) 1.0609(2) 0.50646(17) 0.0271(7) Uani 1 1 d . . .
H22A H 0.0829 1.1102 0.5474 0.032 Uiso 1 1 calc R . .
H22B H 0.06 1.01 0.5264 0.032 Uiso 1 1 calc R . .
C23 C 0.05523(12) 1.09397(19) 0.42149(16) 0.0222(6) Uani 1 1 d . . .
H23A H 0.0761 1.1496 0.4047 0.027 Uiso 1 1 calc R . .
H23B H 0.0116 1.1083 0.4269 0.027 Uiso 1 1 calc R . .
C24 C 0.06105(11) 1.02008(17) 0.35383(15) 0.0163(5) Uani 1 1 d . . .
H24A H 0.0433 1.0425 0.3 0.02 Uiso 1 1 calc R . .
H24B H 0.0381 0.9657 0.3688 0.02 Uiso 1 1 calc R . .
Fe1B Fe 0.267499(16) 0.41585(2) 0.26258(2) 0.01491(8) Uani 1 1 d . B .
Fe2B Fe 0.369646(17) 0.46964(2) 0.34434(2) 0.01343(8) Uani 1 1 d . . .
Cr1B Cr 0.422100(18) 0.32888(3) 0.12539(2) 0.01255(9) Uani 1 1 d . . .
P1B P 0.35989(3) 0.44093(4) 0.20253(4) 0.01094(13) Uani 1 1 d . B .
O1B O 0.21437(8) 0.58637(13) 0.19848(11) 0.0229(4) Uani 1 1 d . . .
O2B O 0.37096(9) 0.66745(12) 0.32160(11) 0.0231(4) Uani 1 1 d . . .
O3B O 0.25328(9) 0.51743(13) 0.41676(11) 0.0248(4) Uani 1 1 d . . .
O4B O 0.50348(8) 0.18055(12) 0.05905(11) 0.0220(4) Uani 1 1 d . . .
O5B O 0.30418(9) 0.28351(13) 0.01822(11) 0.0237(4) Uani 1 1 d . . .
O6B O 0.53719(9) 0.42301(14) 0.20612(12) 0.0285(5) Uani 1 1 d . . .
O7B O 0.44855(8) 0.42896(13) -0.03654(11) 0.0236(4) Uani 1 1 d . . .
O8B O 0.40728(10) 0.18144(14) 0.25855(12) 0.0313(5) Uani 1 1 d . . .
C1B C 0.23776(11) 0.51890(18) 0.22196(15) 0.0160(5) Uani 1 1 d . B .
C2B C 0.37024(12) 0.58857(18) 0.32671(15) 0.0165(5) Uani 1 1 d . B .
C3B C 0.28349(12) 0.48350(17) 0.36532(15) 0.0183(5) Uani 1 1 d . B .
C4B C 0.47165(12) 0.23769(17) 0.08200(15) 0.0161(5) Uani 1 1 d . B .
C5B C 0.34780(12) 0.29732(17) 0.06198(16) 0.0170(5) Uani 1 1 d . B .
C6B C 0.49357(12) 0.38659(18) 0.17811(15) 0.0182(5) Uani 1 1 d . B .
C7B C 0.43793(11) 0.39708(17) 0.02696(16) 0.0165(5) Uani 1 1 d . B .
C8B C 0.41117(12) 0.24052(18) 0.21123(16) 0.0199(6) Uani 1 1 d . B .
C31 C 0.18254(14) 0.3593(2) 0.29355(19) 0.0324(7) Uiso 1 1 d . B .
H31 H 0.1486 0.3938 0.3088 0.039 Uiso 1 1 calc R A 1
C32 C 0.2231(2) 0.3220(3) 0.3446(3) 0.0142(9) Uiso 0.6 1 d P B 1
H32 H 0.224 0.327 0.4031 0.017 Uiso 0.6 1 calc PR B 1
C33 C 0.2667(2) 0.2720(3) 0.3000(3) 0.0156(9) Uiso 0.6 1 d P B 1
H33 H 0.2999 0.2382 0.3241 0.019 Uiso 0.6 1 calc PR B 1
C34 C 0.2515(2) 0.2816(3) 0.2127(4) 0.0193(11) Uiso 0.6 1 d P B 1
H34 H 0.2726 0.2553 0.1693 0.023 Uiso 0.6 1 calc PR B 1
C35 C 0.1988(3) 0.3380(4) 0.2034(4) 0.0284(12) Uiso 0.6 1 d P B 1
H35 H 0.1782 0.3579 0.1534 0.034 Uiso 0.6 1 calc PR B 1
C32B C 0.2378(4) 0.2953(6) 0.3220(6) 0.0327(19) Uiso 0.4 1 d P B 2
H32B H 0.2514 0.2775 0.3763 0.039 Uiso 0.4 1 calc PR B 2
C33B C 0.2621(3) 0.2709(5) 0.2436(6) 0.0172(16) Uiso 0.4 1 d P B 2
H33B H 0.2966 0.2343 0.2353 0.021 Uiso 0.4 1 calc PR B 2
C34B C 0.2228(3) 0.3138(4) 0.1814(4) 0.0133(13) Uiso 0.4 1 d P B 2
H34B H 0.2271 0.3097 0.1235 0.016 Uiso 0.4 1 calc PR B 2
C35B C 0.1769(3) 0.3630(4) 0.2184(4) 0.0129(13) Uiso 0.4 1 d P B 2
H35B H 0.1454 0.3952 0.1884 0.015 Uiso 0.4 1 calc PR B 2
C41 C 0.41690(13) 0.48807(19) 0.46225(15) 0.0223(6) Uani 1 1 d . B .
H41 H 0.4148 0.5417 0.4939 0.027 Uiso 1 1 calc R . .
C42 C 0.46039(12) 0.46953(19) 0.40000(16) 0.0213(6) Uani 1 1 d . B .
H42 H 0.4914 0.5091 0.3835 0.026 Uiso 1 1 calc R . .
C43 C 0.44811(13) 0.38075(18) 0.36789(16) 0.0217(6) Uani 1 1 d . B .
H43 H 0.4701 0.351 0.3272 0.026 Uiso 1 1 calc R . .
C44 C 0.39658(13) 0.34460(19) 0.40821(16) 0.0232(6) Uani 1 1 d . B .
H44 H 0.3782 0.2875 0.3978 0.028 Uiso 1 1 calc R . .
C45 C 0.37773(13) 0.41080(18) 0.46732(16) 0.0230(6) Uani 1 1 d . B .
H45 H 0.3453 0.4043 0.503 0.028 Uiso 1 1 calc R . .
C51 C 0.35702(11) 0.55220(16) 0.14259(14) 0.0119(5) Uani 1 1 d . . .
H51 H 0.3326 0.5953 0.1747 0.014 Uiso 1 1 calc R B .
C52 C 0.32315(11) 0.54262(16) 0.05467(14) 0.0131(5) Uani 1 1 d . B .
H52A H 0.3452 0.499 0.0213 0.016 Uiso 1 1 calc R . .
H52B H 0.2814 0.5193 0.0605 0.016 Uiso 1 1 calc R . .
C53 C 0.31960(12) 0.63553(17) 0.00942(16) 0.0179(5) Uani 1 1 d . . .
H53A H 0.3011 0.627 -0.0474 0.021 Uiso 1 1 calc R B .
H53B H 0.2928 0.6764 0.0391 0.021 Uiso 1 1 calc R . .
C54 C 0.38361(12) 0.67978(19) 0.00479(16) 0.0223(6) Uani 1 1 d . B .
H54A H 0.3789 0.7404 -0.0202 0.027 Uiso 1 1 calc R . .
H54B H 0.4087 0.6431 -0.0313 0.027 Uiso 1 1 calc R . .
C55 C 0.41703(12) 0.68794(17) 0.09227(16) 0.0185(5) Uani 1 1 d . . .
H55A H 0.4585 0.7125 0.0869 0.022 Uiso 1 1 calc R B .
H55B H 0.3945 0.7304 0.1263 0.022 Uiso 1 1 calc R . .
C56 C 0.42175(11) 0.59497(16) 0.13626(15) 0.0140(5) Uani 1 1 d . B .
H56A H 0.4415 0.6025 0.1925 0.017 Uiso 1 1 calc R . .
H56B H 0.4475 0.5541 0.1049 0.017 Uiso 1 1 calc R . .
 
loop_
    _atom_site_aniso_label
    _atom_site_aniso_U_11
    _atom_site_aniso_U_22
    _atom_site_aniso_U_33
    _atom_site_aniso_U_23
    _atom_site_aniso_U_13
    _atom_site_aniso_U_12
Fe1 0.01160(17) 0.01376(18) 0.01053(17) 0.00062(14) 0.00061(13) 0.00105(14)
Fe2 0.01283(18) 0.01554(18) 0.01018(17) 0.00163(14) -0.00114(13) 0.00115(14)
Cr1 0.0132(2) 0.0145(2) 0.0150(2) 0.00143(16) 0.00047(16) -0.00117(16)
P1 0.0119(3) 0.0131(3) 0.0096(3) 0.0002(2) 0.0000(2) 0.0001(2)
O1 0.0222(10) 0.0248(10) 0.0198(10) -0.0053(8) -0.0034(8) -0.0020(8)
O2 0.0271(11) 0.0154(10) 0.0281(11) -0.0003(8) 0.0061(8) 0.0027(8)
O3 0.0204(10) 0.0169(9) 0.0223(10) 0.0038(8) 0.0045(8) -0.0024(8)
O4 0.0314(12) 0.0205(11) 0.0379(12) 0.0052(9) -0.0029(9) -0.0097(9)
O5 0.0245(11) 0.0274(11) 0.0252(11) 0.0038(8) -0.0066(9) 0.0015(9)
O6 0.0148(10) 0.0419(13) 0.0483(14) 0.0163(11) -0.0022(9) 0.0025(9)
O7 0.0324(12) 0.0294(11) 0.0173(10) -0.0055(8) -0.0040(8) 0.0075(9)
O8 0.0337(12) 0.0326(12) 0.0255(11) 0.0022(9) 0.0130(9) -0.0003(9)
C1 0.0092(12) 0.0197(13) 0.0201(13) 0.0046(11) 0.0018(10) 0.0014(10)
C2 0.0134(13) 0.0195(14) 0.0172(13) 0.0060(11) 0.0005(10) 0.0002(11)
C3 0.0179(13) 0.0163(13) 0.0123(12) -0.0014(10) 0.0010(10) 0.0038(11)
C4 0.0168(14) 0.0264(16) 0.0206(14) 0.0019(11) -0.0018(11) -0.0044(11)
C5 0.0217(14) 0.0137(13) 0.0173(13) 0.0018(10) 0.0041(11) -0.0038(11)
C6 0.0211(15) 0.0211(14) 0.0251(15) 0.0046(11) 0.0053(12) -0.0043(12)
C7 0.0134(13) 0.0168(13) 0.0220(15) 0.0032(11) -0.0054(10) 0.0003(10)
C8 0.0210(14) 0.0168(14) 0.0271(15) 0.0016(11) 0.0017(12) -0.0010(11)
C9 0.0179(13) 0.0227(14) 0.0157(13) 0.0028(11) 0.0018(10) 0.0092(11)
C10 0.0183(13) 0.0139(13) 0.0270(15) 0.0010(11) 0.0108(11) 0.0039(11)
C11 0.0197(14) 0.0229(14) 0.0224(14) -0.0096(11) -0.0004(11) 0.0072(11)
C12 0.0235(14) 0.0247(14) 0.0153(13) 0.0032(11) 0.0085(11) 0.0113(12)
C13 0.0121(12) 0.0198(14) 0.0250(14) -0.0002(11) 0.0047(10) 0.0032(10)
C14 0.0222(15) 0.057(2) 0.0112(13) -0.0125(13) -0.0028(11) 0.0094(14)
C15 0.0338(18) 0.058(2) 0.0149(14) 0.0163(14) -0.0054(12) -0.0171(16)
C16 0.047(2) 0.0196(15) 0.0285(16) 0.0021(12) -0.0276(15) 0.0035(14)
C17 0.0128(13) 0.0407(17) 0.0155(13) -0.0071(12) -0.0049(10) 0.0031(12)
C18 0.0252(15) 0.0224(14) 0.0158(13) 0.0007(11) -0.0113(11) -0.0024(12)
C19 0.0138(12) 0.0168(13) 0.0101(12) -0.0015(10) -0.0008(9) -0.0001(10)
C20 0.0161(13) 0.0236(14) 0.0117(12) -0.0013(10) 0.0003(10) 0.0023(11)
C21 0.0246(15) 0.0330(16) 0.0104(12) -0.0049(11) -0.0027(10) 0.0038(12)
C22 0.0246(15) 0.0408(18) 0.0159(14) -0.0082(12) 0.0027(11) 0.0071(13)
C23 0.0176(14) 0.0270(15) 0.0219(14) -0.0058(12) 0.0011(11) 0.0073(12)
C24 0.0163(13) 0.0206(13) 0.0119(12) -0.0001(10) 0.0001(10) 0.0010(11)
Fe1B 0.01672(19) 0.01312(18) 0.01556(18) -0.00172(14) 0.00627(14) -0.00313(15)
Fe2B 0.01905(19) 0.01284(18) 0.00835(17) 0.00140(13) 0.00059(14) 0.00290(14)
Cr1B 0.0137(2) 0.0130(2) 0.01108(19) -0.00189(15) 0.00137(15) 0.00085(16)
P1B 0.0127(3) 0.0110(3) 0.0092(3) 0.0000(2) 0.0011(2) -0.0003(2)
O1B 0.0196(10) 0.0243(10) 0.0246(10) -0.0012(8) 0.0006(8) 0.0048(8)
O2B 0.0366(12) 0.0148(10) 0.0173(10) -0.0017(8) -0.0046(8) 0.0019(8)
O3B 0.0276(11) 0.0341(11) 0.0133(9) -0.0029(8) 0.0058(8) 0.0096(9)
O4B 0.0206(10) 0.0199(10) 0.0258(10) -0.0081(8) 0.0025(8) 0.0043(8)
O5B 0.0214(10) 0.0308(11) 0.0188(10) -0.0022(8) -0.0004(8) -0.0071(8)
O6B 0.0215(11) 0.0356(12) 0.0274(11) -0.0005(9) -0.0056(9) -0.0061(9)
O7B 0.0230(10) 0.0287(11) 0.0199(10) 0.0027(8) 0.0083(8) 0.0030(8)
O8B 0.0391(12) 0.0262(11) 0.0290(11) 0.0095(9) 0.0057(9) 0.0035(10)
C1B 0.0126(12) 0.0238(14) 0.0119(12) -0.0069(10) 0.0031(10) -0.0046(11)
C2B 0.0190(13) 0.0223(15) 0.0079(12) -0.0018(10) -0.0024(10) 0.0007(11)
C3B 0.0244(14) 0.0177(13) 0.0127(12) 0.0026(10) 0.0011(11) 0.0007(11)
C4B 0.0174(13) 0.0180(13) 0.0128(12) -0.0003(10) -0.0004(10) -0.0043(11)
C5B 0.0197(14) 0.0157(13) 0.0163(13) -0.0012(10) 0.0078(11) 0.0014(11)
C6B 0.0196(14) 0.0227(14) 0.0126(13) 0.0002(10) 0.0036(10) 0.0048(11)
C7B 0.0137(13) 0.0173(13) 0.0186(14) -0.0061(11) 0.0013(10) 0.0007(10)
C8B 0.0194(14) 0.0203(14) 0.0200(14) -0.0043(11) 0.0016(11) 0.0038(11)
C41 0.0318(16) 0.0251(15) 0.0093(12) 0.0004(11) -0.0047(11) 0.0105(12)
C42 0.0219(14) 0.0278(15) 0.0133(13) 0.0041(11) -0.0064(10) 0.0060(12)
C43 0.0301(15) 0.0227(14) 0.0121(13) 0.0041(11) -0.0004(11) 0.0131(12)
C44 0.0365(17) 0.0186(14) 0.0145(13) 0.0067(11) 0.0017(12) 0.0076(12)
C45 0.0325(16) 0.0258(15) 0.0112(13) 0.0067(11) 0.0052(11) 0.0127(13)
C51 0.0125(12) 0.0131(12) 0.0100(11) 0.0010(9) 0.0001(9) 0.0012(10)
C52 0.0125(12) 0.0157(12) 0.0110(12) 0.0001(10) -0.0003(9) -0.0001(10)
C53 0.0198(14) 0.0209(14) 0.0128(12) 0.0038(10) -0.0007(10) 0.0019(11)
C54 0.0271(15) 0.0212(14) 0.0188(14) 0.0076(11) 0.0031(11) -0.0017(12)
C55 0.0202(14) 0.0175(13) 0.0179(13) -0.0002(10) 0.0029(11) -0.0038(11)
C56 0.0161(13) 0.0137(12) 0.0123(12) 0.0001(10) 0.0012(10) -0.0010(10)
 
 
#----------------------------------------------------------------------------#
#                   MOLECULAR GEOMETRY                                       #
#----------------------------------------------------------------------------#
 
_geom_special_details
;
 All esds (except the esd in the dihedral angle between two l.s. planes)
 are estimated using the full covariance matrix.  The cell esds are taken
 into account individually in the estimation of esds in distances, angles
 and torsion angles; correlations between esds in cell parameters are only
 used when they are defined by crystal symmetry.  An approximate (isotropic)
 treatment of cell esds is used for estimating esds involving l.s. planes.
;
loop_
    _geom_bond_atom_site_label_1
    _geom_bond_atom_site_label_2
    _geom_bond_distance
    _geom_bond_site_symmetry_2
    _geom_bond_publ_flag
Fe1 C1 1.759(3) . ?
Fe1 C3 1.933(2) . ?
Fe1 C9 2.097(2) . ?
Fe1 C13 2.104(2) . ?
Fe1 C12 2.129(2) . ?
Fe1 C10 2.139(2) . ?
Fe1 C11 2.147(3) . ?
Fe1 P1 2.2880(7) . ?
Fe1 Fe2 2.6135(5) . ?
Fe2 C2 1.755(3) . ?
Fe2 C3 1.926(3) . ?
Fe2 C16 2.089(3) . ?
Fe2 C17 2.090(3) . ?
Fe2 C15 2.120(3) . ?
Fe2 C18 2.140(3) . ?
Fe2 C14 2.148(3) . ?
Fe2 P1 2.2838(7) . ?
Cr1 C4 1.854(3) . ?
Cr1 C8 1.894(3) . ?
Cr1 C5 1.896(3) . ?
Cr1 C7 1.899(3) . ?
Cr1 C6 1.905(3) . ?
Cr1 P1 2.4794(7) . ?
P1 C19 1.877(2) . ?
O1 C1 1.147(3) . ?
O2 C2 1.148(3) . ?
O3 C3 1.175(3) . ?
O4 C4 1.154(3) . ?
O5 C5 1.147(3) . ?
O6 C6 1.143(3) . ?
O7 C7 1.146(3) . ?
O8 C8 1.151(3) . ?
C9 C10 1.405(4) . ?
C9 C13 1.427(4) . ?
C9 H9 0.93 . ?
C10 C11 1.405(4) . ?
C10 H10 0.93 . ?
C11 C12 1.410(4) . ?
C11 H11 0.93 . ?
C12 C13 1.409(4) . ?
C12 H12 0.93 . ?
C13 H13 0.93 . ?
C14 C15 1.394(4) . ?
C14 C18 1.401(4) . ?
C14 H14 0.93 . ?
C15 C16 1.392(5) . ?
C15 H15 0.93 . ?
C16 C17 1.419(4) . ?
C16 H16 0.93 . ?
C17 C18 1.400(4) . ?
C17 H17 0.93 . ?
C18 H18 0.93 . ?
C19 C20 1.531(3) . ?
C19 C24 1.534(3) . ?
C19 H19 0.98 . ?
C20 C21 1.535(3) . ?
C20 H20A 0.97 . ?
C20 H20B 0.97 . ?
C21 C22 1.523(4) . ?
C21 H21A 0.97 . ?
C21 H21B 0.97 . ?
C22 C23 1.528(4) . ?
C22 H22A 0.97 . ?
C22 H22B 0.97 . ?
C23 C24 1.530(3) . ?
C23 H23A 0.97 . ?
C23 H23B 0.97 . ?
C24 H24A 0.97 . ?
C24 H24B 0.97 . ?
Fe1B C1B 1.738(3) . ?
Fe1B C3B 1.917(3) . ?
Fe1B C35 2.044(5) . ?
Fe1B C31 2.089(3) . ?
Fe1B C32B 2.109(8) . ?
Fe1B C34 2.128(5) . ?
Fe1B C33B 2.133(7) . ?
Fe1B C32 2.150(4) . ?
Fe1B C34B 2.153(6) . ?
Fe1B C35B 2.170(6) . ?
Fe1B C33 2.177(4) . ?
Fe1B P1B 2.2846(7) . ?
Fe2B C2B 1.753(3) . ?
Fe2B C3B 1.913(3) . ?
Fe2B C41 2.090(2) . ?
Fe2B C42 2.091(3) . ?
Fe2B C45 2.127(2) . ?
Fe2B C43 2.140(3) . ?
Fe2B C44 2.145(3) . ?
Fe2B P1B 2.2844(7) . ?
Cr1B C4B 1.860(3) . ?
Cr1B C5B 1.891(3) . ?
Cr1B C8B 1.898(3) . ?
Cr1B C7B 1.898(3) . ?
Cr1B C6B 1.899(3) . ?
Cr1B P1B 2.4793(7) . ?
P1B C51 1.877(2) . ?
O1B C1B 1.154(3) . ?
O2B C2B 1.151(3) . ?
O3B C3B 1.182(3) . ?
O4B C4B 1.150(3) . ?
O5B C5B 1.149(3) . ?
O6B C6B 1.143(3) . ?
O7B C7B 1.145(3) . ?
O8B C8B 1.148(3) . ?
C31 C35B 1.192(7) . ?
C31 C32 1.275(5) . ?
C31 C35 1.524(7) . ?
C31 C32B 1.554(10) . ?
C31 H31 0.93 . ?
C32 C33 1.410(6) . ?
C32 H32 0.93 . ?
C33 C34 1.409(6) . ?
C33 H33 0.93 . ?
C34 C35 1.400(8) . ?
C34 H34 0.93 . ?
C35 H35 0.93 . ?
C32B C33B 1.424(12) . ?
C32B H32B 0.93 . ?
C33B C34B 1.405(10) . ?
C33B H33B 0.93 . ?
C34B C35B 1.379(9) . ?
C34B H34B 0.93 . ?
C35B H35B 0.93 . ?
C41 C45 1.410(4) . ?
C41 C42 1.427(4) . ?
C41 H41 0.93 . ?
C42 C43 1.408(4) . ?
C42 H42 0.93 . ?
C43 C44 1.414(4) . ?
C43 H43 0.93 . ?
C44 C45 1.421(4) . ?
C44 H44 0.93 . ?
C45 H45 0.93 . ?
C51 C56 1.533(3) . ?
C51 C52 1.539(3) . ?
C51 H51 0.98 . ?
C52 C53 1.530(3) . ?
C52 H52A 0.97 . ?
C52 H52B 0.97 . ?
C53 C54 1.525(4) . ?
C53 H53A 0.97 . ?
C53 H53B 0.97 . ?
C54 C55 1.527(3) . ?
C54 H54A 0.97 . ?
C54 H54B 0.97 . ?
C55 C56 1.523(3) . ?
C55 H55A 0.97 . ?
C55 H55B 0.97 . ?
C56 H56A 0.97 . ?
C56 H56B 0.97 . ?
 
loop_
    _geom_angle_atom_site_label_1
    _geom_angle_atom_site_label_2
    _geom_angle_atom_site_label_3
    _geom_angle
    _geom_angle_site_symmetry_1
    _geom_angle_site_symmetry_3
    _geom_angle_publ_flag
C1 Fe1 C3 90.01(11) . . ?
C1 Fe1 C9 89.86(11) . . ?
C3 Fe1 C9 139.89(10) . . ?
C1 Fe1 C13 92.06(11) . . ?
C3 Fe1 C13 100.20(10) . . ?
C9 Fe1 C13 39.73(10) . . ?
C1 Fe1 C12 126.92(11) . . ?
C3 Fe1 C12 83.20(10) . . ?
C9 Fe1 C12 65.32(10) . . ?
C13 Fe1 C12 38.89(10) . . ?
C1 Fe1 C10 122.33(11) . . ?
C3 Fe1 C10 143.57(10) . . ?
C9 Fe1 C10 38.72(10) . . ?
C13 Fe1 C10 65.46(10) . . ?
C12 Fe1 C10 64.53(10) . . ?
C1 Fe1 C11 154.07(11) . . ?
C3 Fe1 C11 105.48(10) . . ?
C9 Fe1 C11 64.85(10) . . ?
C13 Fe1 C11 65.15(10) . . ?
C12 Fe1 C11 38.51(10) . . ?
C10 Fe1 C11 38.27(10) . . ?
C1 Fe1 P1 90.92(8) . . ?
C3 Fe1 P1 99.36(8) . . ?
C9 Fe1 P1 120.75(7) . . ?
C13 Fe1 P1 160.21(7) . . ?
C12 Fe1 P1 142.14(8) . . ?
C10 Fe1 P1 96.60(7) . . ?
C11 Fe1 P1 106.48(8) . . ?
C1 Fe1 Fe2 104.88(8) . . ?
C3 Fe1 Fe2 47.27(7) . . ?
C9 Fe1 Fe2 164.36(8) . . ?
C13 Fe1 Fe2 141.98(7) . . ?
C12 Fe1 Fe2 108.04(7) . . ?
C10 Fe1 Fe2 125.88(7) . . ?
C11 Fe1 Fe2 100.87(7) . . ?
P1 Fe1 Fe2 55.058(19) . . ?
C2 Fe2 C3 88.18(11) . . ?
C2 Fe2 C16 85.48(12) . . ?
C3 Fe2 C16 115.01(12) . . ?
C2 Fe2 C17 97.74(11) . . ?
C3 Fe2 C17 152.56(11) . . ?
C16 Fe2 C17 39.69(11) . . ?
C2 Fe2 C15 111.85(13) . . ?
C3 Fe2 C15 87.38(11) . . ?
C16 Fe2 C15 38.62(12) . . ?
C17 Fe2 C15 65.51(11) . . ?
C2 Fe2 C18 135.69(11) . . ?
C3 Fe2 C18 133.22(10) . . ?
C16 Fe2 C18 64.83(11) . . ?
C17 Fe2 C18 38.64(10) . . ?
C15 Fe2 C18 64.30(11) . . ?
C2 Fe2 C14 148.64(12) . . ?
C3 Fe2 C14 96.92(11) . . ?
C16 Fe2 C14 64.28(12) . . ?
C17 Fe2 C14 64.72(10) . . ?
C15 Fe2 C14 38.12(12) . . ?
C18 Fe2 C14 38.14(11) . . ?
C2 Fe2 P1 92.05(8) . . ?
C3 Fe2 P1 99.72(7) . . ?
C16 Fe2 P1 145.05(10) . . ?
C17 Fe2 P1 106.78(8) . . ?
C15 Fe2 P1 155.37(10) . . ?
C18 Fe2 P1 94.69(7) . . ?
C14 Fe2 P1 117.27(9) . . ?
C2 Fe2 Fe1 104.28(8) . . ?
C3 Fe2 Fe1 47.49(7) . . ?
C16 Fe2 Fe1 158.35(10) . . ?
C17 Fe2 Fe1 151.51(8) . . ?
C15 Fe2 Fe1 120.32(9) . . ?
C18 Fe2 Fe1 115.39(7) . . ?
C14 Fe2 Fe1 101.82(8) . . ?
P1 Fe2 Fe1 55.209(19) . . ?
C4 Cr1 C8 85.72(12) . . ?
C4 Cr1 C5 88.61(11) . . ?
C8 Cr1 C5 87.36(11) . . ?
C4 Cr1 C7 83.83(11) . . ?
C8 Cr1 C7 167.57(11) . . ?
C5 Cr1 C7 99.08(11) . . ?
C4 Cr1 C6 97.15(11) . . ?
C8 Cr1 C6 85.17(12) . . ?
C5 Cr1 C6 170.18(12) . . ?
C7 Cr1 C6 89.47(11) . . ?
C4 Cr1 P1 169.65(9) . . ?
C8 Cr1 P1 102.16(8) . . ?
C5 Cr1 P1 85.09(8) . . ?
C7 Cr1 P1 89.05(8) . . ?
C6 Cr1 P1 90.26(8) . . ?
C19 P1 Fe2 107.71(8) . . ?
C19 P1 Fe1 110.99(8) . . ?
Fe2 P1 Fe1 69.73(2) . . ?
C19 P1 Cr1 109.53(8) . . ?
Fe2 P1 Cr1 128.60(3) . . ?
Fe1 P1 Cr1 124.72(3) . . ?
O1 C1 Fe1 173.9(2) . . ?
O2 C2 Fe2 172.9(2) . . ?
O3 C3 Fe2 138.1(2) . . ?
O3 C3 Fe1 136.7(2) . . ?
Fe2 C3 Fe1 85.24(10) . . ?
O4 C4 Cr1 176.0(2) . . ?
O5 C5 Cr1 176.0(2) . . ?
O6 C6 Cr1 177.7(3) . . ?
O7 C7 Cr1 173.0(2) . . ?
O8 C8 Cr1 171.3(2) . . ?
C10 C9 C13 108.2(2) . . ?
C10 C9 Fe1 72.28(14) . . ?
C13 C9 Fe1 70.40(14) . . ?
C10 C9 H9 125.9 . . ?
C13 C9 H9 125.9 . . ?
Fe1 C9 H9 123.1 . . ?
C9 C10 C11 108.2(2) . . ?
C9 C10 Fe1 69.00(14) . . ?
C11 C10 Fe1 71.16(15) . . ?
C9 C10 H10 125.9 . . ?
C11 C10 H10 125.9 . . ?
Fe1 C10 H10 125.5 . . ?
C10 C11 C12 108.1(2) . . ?
C10 C11 Fe1 70.57(14) . . ?
C12 C11 Fe1 70.06(15) . . ?
C10 C11 H11 126 . . ?
C12 C11 H11 126 . . ?
Fe1 C11 H11 125 . . ?
C13 C12 C11 108.5(2) . . ?
C13 C12 Fe1 69.58(14) . . ?
C11 C12 Fe1 71.43(14) . . ?
C13 C12 H12 125.7 . . ?
C11 C12 H12 125.7 . . ?
Fe1 C12 H12 124.8 . . ?
C12 C13 C9 107.0(2) . . ?
C12 C13 Fe1 71.53(14) . . ?
C9 C13 Fe1 69.87(14) . . ?
C12 C13 H13 126.5 . . ?
C9 C13 H13 126.5 . . ?
Fe1 C13 H13 123.8 . . ?
C15 C14 C18 108.4(3) . . ?
C15 C14 Fe2 69.84(16) . . ?
C18 C14 Fe2 70.59(15) . . ?
C15 C14 H14 125.8 . . ?
C18 C14 H14 125.8 . . ?
Fe2 C14 H14 125.3 . . ?
C16 C15 C14 108.0(3) . . ?
C16 C15 Fe2 69.48(16) . . ?
C14 C15 Fe2 72.04(16) . . ?
C16 C15 H15 126 . . ?
C14 C15 H15 126 . . ?
Fe2 C15 H15 124.1 . . ?
C15 C16 C17 108.3(3) . . ?
C15 C16 Fe2 71.90(16) . . ?
C17 C16 Fe2 70.20(15) . . ?
C15 C16 H16 125.9 . . ?
C17 C16 H16 125.9 . . ?
Fe2 C16 H16 123.7 . . ?
C18 C17 C16 107.1(3) . . ?
C18 C17 Fe2 72.60(15) . . ?
C16 C17 Fe2 70.11(15) . . ?
C18 C17 H17 126.5 . . ?
C16 C17 H17 126.5 . . ?
Fe2 C17 H17 122.5 . . ?
C17 C18 C14 108.2(3) . . ?
C17 C18 Fe2 68.76(15) . . ?
C14 C18 Fe2 71.27(16) . . ?
C17 C18 H18 125.9 . . ?
C14 C18 H18 125.9 . . ?
Fe2 C18 H18 125.6 . . ?
C20 C19 C24 109.8(2) . . ?
C20 C19 P1 114.77(17) . . ?
C24 C19 P1 112.43(16) . . ?
C20 C19 H19 106.4 . . ?
C24 C19 H19 106.4 . . ?
P1 C19 H19 106.4 . . ?
C19 C20 C21 109.7(2) . . ?
C19 C20 H20A 109.7 . . ?
C21 C20 H20A 109.7 . . ?
C19 C20 H20B 109.7 . . ?
C21 C20 H20B 109.7 . . ?
H20A C20 H20B 108.2 . . ?
C22 C21 C20 111.7(2) . . ?
C22 C21 H21A 109.3 . . ?
C20 C21 H21A 109.3 . . ?
C22 C21 H21B 109.3 . . ?
C20 C21 H21B 109.3 . . ?
H21A C21 H21B 107.9 . . ?
C21 C22 C23 111.9(2) . . ?
C21 C22 H22A 109.2 . . ?
C23 C22 H22A 109.2 . . ?
C21 C22 H22B 109.2 . . ?
C23 C22 H22B 109.2 . . ?
H22A C22 H22B 107.9 . . ?
C22 C23 C24 110.5(2) . . ?
C22 C23 H23A 109.5 . . ?
C24 C23 H23A 109.5 . . ?
C22 C23 H23B 109.5 . . ?
C24 C23 H23B 109.5 . . ?
H23A C23 H23B 108.1 . . ?
C23 C24 C19 109.9(2) . . ?
C23 C24 H24A 109.7 . . ?
C19 C24 H24A 109.7 . . ?
C23 C24 H24B 109.7 . . ?
C19 C24 H24B 109.7 . . ?
H24A C24 H24B 108.2 . . ?
C1B Fe1B C3B 85.10(11) . . ?
C1B Fe1B C35 93.99(18) . . ?
C3B Fe1B C35 139.6(2) . . ?
C1B Fe1B C31 96.90(12) . . ?
C3B Fe1B C31 96.65(12) . . ?
C35 Fe1B C31 43.27(19) . . ?
C1B Fe1B C32B 140.2(3) . . ?
C3B Fe1B C32B 95.2(3) . . ?
C35 Fe1B C32B 60.9(3) . . ?
C31 Fe1B C32B 43.4(3) . . ?
C1B Fe1B C34 127.38(18) . . ?
C3B Fe1B C34 143.52(18) . . ?
C35 Fe1B C34 39.1(2) . . ?
C31 Fe1B C34 66.56(16) . . ?
C32B Fe1B C34 49.9(3) . . ?
C1B Fe1B C33B 141.7(3) . . ?
C3B Fe1B C33B 129.3(3) . . ?
C35 Fe1B C33B 49.8(3) . . ?
C31 Fe1B C33B 66.6(2) . . ?
C32B Fe1B C33B 39.2(3) . . ?
C34 Fe1B C33B 14.8(2) . . ?
C1B Fe1B C32 127.29(15) . . ?
C3B Fe1B C32 82.80(15) . . ?
C35 Fe1B C32 65.81(19) . . ?
C31 Fe1B C32 34.97(14) . . ?
C32B Fe1B C32 16.9(2) . . ?
C34 Fe1B C32 64.79(19) . . ?
C33B Fe1B C32 55.6(2) . . ?
C1B Fe1B C34B 103.5(2) . . ?
C3B Fe1B C34B 155.92(19) . . ?
C35 Fe1B C34B 19.85(18) . . ?
C31 Fe1B C34B 60.3(2) . . ?
C32B Fe1B C34B 63.7(3) . . ?
C34 Fe1B C34B 24.27(18) . . ?
C33B Fe1B C34B 38.3(3) . . ?
C32 Fe1B C34B 74.1(2) . . ?
C1B Fe1B C35B 83.32(19) . . ?
C3B Fe1B C35B 124.5(2) . . ?
C35 Fe1B C35B 17.47(19) . . ?
C31 Fe1B C35B 32.44(18) . . ?
C32B Fe1B C35B 63.8(3) . . ?
C34 Fe1B C35B 55.5(2) . . ?
C33B Fe1B C35B 64.1(3) . . ?
C32 Fe1B C35B 63.1(2) . . ?
C34B Fe1B C35B 37.2(2) . . ?
C1B Fe1B C33 157.19(14) . . ?
C3B Fe1B C33 105.46(15) . . ?
C35 Fe1B C33 64.8(2) . . ?
C31 Fe1B C33 62.28(15) . . ?
C32B Fe1B C33 21.6(2) . . ?
C34 Fe1B C33 38.20(17) . . ?
C33B Fe1B C33 23.9(2) . . ?
C32 Fe1B C33 38.03(16) . . ?
C34B Fe1B C33 59.2(2) . . ?
C35B Fe1B C33 74.0(2) . . ?
C1B Fe1B P1B 90.98(8) . . ?
C3B Fe1B P1B 99.07(8) . . ?
C35 Fe1B P1B 121.31(19) . . ?
C31 Fe1B P1B 162.96(9) . . ?
C32B Fe1B P1B 127.9(3) . . ?
C34 Fe1B P1B 96.67(13) . . ?
C33B Fe1B P1B 98.07(19) . . ?
C32 Fe1B P1B 141.57(12) . . ?
C34B Fe1B P1B 103.19(19) . . ?
C35B Fe1B P1B 135.08(18) . . ?
C33 Fe1B P1B 106.81(13) . . ?
C2B Fe2B C3B 86.58(11) . . ?
C2B Fe2B C41 90.46(11) . . ?
C3B Fe2B C41 104.66(11) . . ?
C2B Fe2B C42 92.99(11) . . ?
C3B Fe2B C42 144.57(10) . . ?
C41 Fe2B C42 39.91(10) . . ?
C2B Fe2B C45 122.85(11) . . ?
C3B Fe2B C45 84.72(11) . . ?
C41 Fe2B C45 39.06(11) . . ?
C42 Fe2B C45 65.89(11) . . ?
C2B Fe2B C43 127.66(11) . . ?
C3B Fe2B C43 142.62(11) . . ?
C41 Fe2B C43 65.61(10) . . ?
C42 Fe2B C43 38.85(10) . . ?
C45 Fe2B C43 65.03(10) . . ?
C2B Fe2B C44 155.28(11) . . ?
C3B Fe2B C44 104.08(11) . . ?
C41 Fe2B C44 65.42(11) . . ?
C42 Fe2B C44 65.32(11) . . ?
C45 Fe2B C44 38.84(10) . . ?
C43 Fe2B C44 38.55(10) . . ?
C2B Fe2B P1B 91.41(8) . . ?
C3B Fe2B P1B 99.19(8) . . ?
C41 Fe2B P1B 156.14(8) . . ?
C42 Fe2B P1B 116.23(7) . . ?
C45 Fe2B P1B 145.73(8) . . ?
C43 Fe2B P1B 94.86(7) . . ?
C44 Fe2B P1B 108.39(7) . . ?
C2B Fe2B Fe1B 103.41(8) . . ?
C3B Fe2B Fe1B 47.28(8) . . ?
C41 Fe2B Fe1B 146.47(8) . . ?
C42 Fe2B Fe1B 161.30(8) . . ?
C45 Fe2B Fe1B 110.76(8) . . ?
C43 Fe2B Fe1B 122.49(8) . . ?
C44 Fe2B Fe1B 100.09(8) . . ?
P1B Fe2B Fe1B 55.308(19) . . ?
C4B Cr1B C5B 96.55(11) . . ?
C4B Cr1B C8B 83.18(11) . . ?
C5B Cr1B C8B 94.53(11) . . ?
C4B Cr1B C7B 86.15(10) . . ?
C5B Cr1B C7B 83.00(10) . . ?
C8B Cr1B C7B 168.70(11) . . ?
C4B Cr1B C6B 90.70(11) . . ?
C5B Cr1B C6B 167.29(11) . . ?
C8B Cr1B C6B 96.69(11) . . ?
C7B Cr1B C6B 87.11(11) . . ?
C4B Cr1B P1B 172.11(8) . . ?
C5B Cr1B P1B 87.62(8) . . ?
C8B Cr1B P1B 89.83(8) . . ?
C7B Cr1B P1B 101.05(8) . . ?
C6B Cr1B P1B 86.46(8) . . ?
C51 P1B Fe2B 109.82(8) . . ?
C51 P1B Fe1B 110.29(8) . . ?
Fe2B P1B Fe1B 69.39(2) . . ?
C51 P1B Cr1B 108.62(8) . . ?
Fe2B P1B Cr1B 125.92(3) . . ?
Fe1B P1B Cr1B 127.60(3) . . ?
O1B C1B Fe1B 175.1(2) . . ?
O2B C2B Fe2B 174.9(2) . . ?
O3B C3B Fe2B 138.0(2) . . ?
O3B C3B Fe1B 136.4(2) . . ?
Fe2B C3B Fe1B 85.55(10) . . ?
O4B C4B Cr1B 176.7(2) . . ?
O5B C5B Cr1B 174.0(2) . . ?
O6B C6B Cr1B 176.7(2) . . ?
O7B C7B Cr1B 172.4(2) . . ?
O8B C8B Cr1B 173.7(2) . . ?
C35B C31 C32 132.7(5) . . ?
C35B C31 C35 24.0(4) . . ?
C32 C31 C35 108.7(4) . . ?
C35B C31 C32B 110.3(5) . . ?
C32 C31 C32B 23.0(3) . . ?
C35 C31 C32B 86.3(5) . . ?
C35B C31 Fe1B 77.5(3) . . ?
C32 C31 Fe1B 75.1(2) . . ?
C35 C31 Fe1B 66.8(2) . . ?
C32B C31 Fe1B 69.0(3) . . ?
C35B C31 H31 101.6 . . ?
C32 C31 H31 125.6 . . ?
C35 C31 H31 125.6 . . ?
C32B C31 H31 147.8 . . ?
Fe1B C31 H31 124 . . ?
C31 C32 C33 110.5(4) . . ?
C31 C32 Fe1B 69.9(2) . . ?
C33 C32 Fe1B 72.0(2) . . ?
C31 C32 H32 124.8 . . ?
C33 C32 H32 124.8 . . ?
Fe1B C32 H32 124.9 . . ?
C34 C33 C32 108.8(4) . . ?
C34 C33 Fe1B 69.0(3) . . ?
C32 C33 Fe1B 70.0(2) . . ?
C34 C33 H33 125.6 . . ?
C32 C33 H33 125.6 . . ?
Fe1B C33 H33 127 . . ?
C35 C34 C33 107.3(4) . . ?
C35 C34 Fe1B 67.2(3) . . ?
C33 C34 Fe1B 72.8(3) . . ?
C35 C34 H34 126.3 . . ?
C33 C34 H34 126.3 . . ?
Fe1B C34 H34 125.3 . . ?
C34 C35 C31 104.6(4) . . ?
C34 C35 Fe1B 73.7(3) . . ?
C31 C35 Fe1B 70.0(2) . . ?
C34 C35 H35 127.7 . . ?
C31 C35 H35 127.7 . . ?
Fe1B C35 H35 120.6 . . ?
C33B C32B C31 102.2(6) . . ?
C33B C32B Fe1B 71.3(4) . . ?
C31 C32B Fe1B 67.6(3) . . ?
C33B C32B H32B 128.9 . . ?
C31 C32B H32B 128.9 . . ?
Fe1B C32B H32B 123.9 . . ?
C34B C33B C32B 105.4(7) . . ?
C34B C33B Fe1B 71.6(4) . . ?
C32B C33B Fe1B 69.5(4) . . ?
C34B C33B H33B 127.3 . . ?
C32B C33B H33B 127.3 . . ?
Fe1B C33B H33B 123.3 . . ?
C35B C34B C33B 110.3(6) . . ?
C35B C34B Fe1B 72.1(4) . . ?
C33B C34B Fe1B 70.1(4) . . ?
C35B C34B H34B 124.9 . . ?
C33B C34B H34B 124.9 . . ?
Fe1B C34B H34B 124.5 . . ?
C31 C35B C34B 111.7(6) . . ?
C31 C35B Fe1B 70.1(3) . . ?
C34B C35B Fe1B 70.7(4) . . ?
C31 C35B H35B 124.1 . . ?
C34B C35B H35B 124.1 . . ?
Fe1B C35B H35B 126.7 . . ?
C45 C41 C42 107.9(2) . . ?
C45 C41 Fe2B 71.92(15) . . ?
C42 C41 Fe2B 70.10(14) . . ?
C45 C41 H41 126 . . ?
C42 C41 H41 126 . . ?
Fe2B C41 H41 123.6 . . ?
C43 C42 C41 107.9(2) . . ?
C43 C42 Fe2B 72.47(15) . . ?
C41 C42 Fe2B 69.99(15) . . ?
C43 C42 H42 126 . . ?
C41 C42 H42 126 . . ?
Fe2B C42 H42 123.1 . . ?
C42 C43 C44 108.2(2) . . ?
C42 C43 Fe2B 68.69(14) . . ?
C44 C43 Fe2B 70.90(15) . . ?
C42 C43 H43 125.9 . . ?
C44 C43 H43 125.9 . . ?
Fe2B C43 H43 126.1 . . ?
C43 C44 C45 108.0(2) . . ?
C43 C44 Fe2B 70.55(14) . . ?
C45 C44 Fe2B 69.92(14) . . ?
C43 C44 H44 126 . . ?
C45 C44 H44 126 . . ?
Fe2B C44 H44 125.1 . . ?
C41 C45 C44 107.9(2) . . ?
C41 C45 Fe2B 69.02(14) . . ?
C44 C45 Fe2B 71.24(14) . . ?
C41 C45 H45 126.1 . . ?
C44 C45 H45 126.1 . . ?
Fe2B C45 H45 125.3 . . ?
C56 C51 C52 110.96(19) . . ?
C56 C51 P1B 112.45(16) . . ?
C52 C51 P1B 112.32(16) . . ?
C56 C51 H51 106.9 . . ?
C52 C51 H51 106.9 . . ?
P1B C51 H51 106.9 . . ?
C53 C52 C51 110.61(19) . . ?
C53 C52 H52A 109.5 . . ?
C51 C52 H52A 109.5 . . ?
C53 C52 H52B 109.5 . . ?
C51 C52 H52B 109.5 . . ?
H52A C52 H52B 108.1 . . ?
C54 C53 C52 112.1(2) . . ?
C54 C53 H53A 109.2 . . ?
C52 C53 H53A 109.2 . . ?
C54 C53 H53B 109.2 . . ?
C52 C53 H53B 109.2 . . ?
H53A C53 H53B 107.9 . . ?
C53 C54 C55 111.4(2) . . ?
C53 C54 H54A 109.4 . . ?
C55 C54 H54A 109.4 . . ?
C53 C54 H54B 109.4 . . ?
C55 C54 H54B 109.4 . . ?
H54A C54 H54B 108 . . ?
C56 C55 C54 111.2(2) . . ?
C56 C55 H55A 109.4 . . ?
C54 C55 H55A 109.4 . . ?
C56 C55 H55B 109.4 . . ?
C54 C55 H55B 109.4 . . ?
H55A C55 H55B 108 . . ?
C55 C56 C51 110.8(2) . . ?
C55 C56 H56A 109.5 . . ?
C51 C56 H56A 109.5 . . ?
C55 C56 H56B 109.5 . . ?
C51 C56 H56B 109.5 . . ?
H56A C56 H56B 108.1 . . ?

#===END

data_compound2e
 
_audit_creation_method         'WinGX routine CIF_UPDATE'
_audit_conform_dict_name        cif_core.dic
_audit_conform_dict_version     2.2
_audit_conform_dict_location    ftp://ftp.iucr.org/pub/cif_core.dic
_publ_requested_category        FM
 
#----------------------------------------------------------------------------#
#                   CHEMICAL INFORMATION                                     #
#----------------------------------------------------------------------------#
 
_chemical_name_systematic
;
 ?
;
_chemical_formula_moiety                'C23 H21 Fe3 O7 P1'
_chemical_formula_sum                   'C23 H21 Fe3 O7 P'
_chemical_formula_weight                607.92
_chemical_compound_source               'synthesis as described'
 
#----------------------------------------------------------------------------#
#                   UNIT CELL INFORMATION                                    #
#----------------------------------------------------------------------------#
 
_symmetry_cell_setting                  triclinic
_symmetry_space_group_name_H-M          'P -1'
_symmetry_space_group_name_Hall         '-P 1'
_symmetry_Int_Tables_number             2
loop_
    _symmetry_equiv_pos_as_xyz
'x, y, z'
'-x, -y, -z'
 
_cell_length_a                          11.0549(10)
_cell_length_b                          14.8440(12)
_cell_length_c                          16.0361(18)
_cell_angle_alpha                       109.399(8)
_cell_angle_beta                        109.268(7)
_cell_angle_gamma                       90.931(9)
_cell_volume                            2319.6(4)
_cell_formula_units_Z                   4
_cell_measurement_temperature           120.0(1)
_cell_measurement_reflns_used           1478
_cell_measurement_theta_min             2.88
_cell_measurement_theta_max             27.1
_cell_measurement_wavelength            0.71073
 
#----------------------------------------------------------------------------#
#                   CRYSTAL INFORMATION                                      #
#----------------------------------------------------------------------------#
 
_exptl_crystal_description              prism
_exptl_crystal_colour                   brown
_exptl_crystal_size_max                 0.61
_exptl_crystal_size_mid                 0.40
_exptl_crystal_size_min                 0.21
_exptl_crystal_density_diffrn           1.741
_exptl_crystal_density_method           'not measured'
_exptl_crystal_F_000                    1232
_exptl_special_details
;
 ?
;
 
#----------------------------------------------------------------------------#
#                   ABSORPTION CORRECTION                                    #
#----------------------------------------------------------------------------#
 
_exptl_absorpt_coefficient_mu           1.963
_exptl_absorpt_correction_type          multi-scan
_exptl_absorpt_process_details		'BRUKER Sadabs'
_exptl_absorpt_correction_T_min         0.571749
_exptl_absorpt_correction_T_max         1
 
#----------------------------------------------------------------------------#
#                   DATA COLLECTION                                          #
#----------------------------------------------------------------------------#
 
_diffrn_ambient_temperature             120(2)
_diffrn_radiation_wavelength            0.71073
_diffrn_radiation_source                'fine-focus sealed tube'
_diffrn_radiation_type                  MoK\a
_diffrn_radiation_monochromator         graphite
_diffrn_measurement_device_type         'Smart-CCD-1000 BRUKER'
_diffrn_measurement_method              'omega scans'
_diffrn_radiation_probe                 x-ray
_diffrn_reflns_av_R_equivalents         0.0245
_diffrn_reflns_av_unetI/netI            0.0243
_diffrn_reflns_number                   27935
_diffrn_reflns_limit_h_min              -13
_diffrn_reflns_limit_h_max              13
_diffrn_reflns_limit_k_min              -18
_diffrn_reflns_limit_k_max              17
_diffrn_reflns_limit_l_min              0
_diffrn_reflns_limit_l_max              20
_diffrn_reflns_theta_min                1.47
_diffrn_reflns_theta_max                26.73
_diffrn_reflns_theta_full               26.73
_diffrn_measured_fraction_theta_full
                                        0.994
_diffrn_measured_fraction_theta_max
                                        0.994
_reflns_number_total                    9792
_reflns_number_gt                       8569
_reflns_threshold_expression            >2sigma(I)
 
#----------------------------------------------------------------------------#
#                   COMPUTER PROGRAMS USED                                   #
#----------------------------------------------------------------------------#
 
_computing_data_collection              'Bruker Smart'
_computing_cell_refinement              'Bruker Smart'
_computing_data_reduction               'Bruker Smart'
_computing_structure_solution           'SHELXL-97 (Sheldrick, 1997)'
_computing_structure_refinement         'SHELXL-97 (Sheldrick, 1997)'
_computing_molecular_graphics           'Ortep-3 for Windows (Farrugia, 1997)'
_computing_publication_material
                                   'WinGX publication routines (Farrugia, 1999)'
 
#----------------------------------------------------------------------------#
#                   REFINEMENT INFORMATION                                   #
#----------------------------------------------------------------------------#
 
_refine_special_details
;
 Refinement of F^2^ against ALL reflections.  The weighted R-factor wR and
 goodness of fit S are based on F^2^, conventional R-factors R are based
 on F, with F set to zero for negative F^2^. The threshold expression of
 F^2^ > 2sigma(F^2^) is used only for calculating R-factors(gt) etc. and is
 not relevant to the choice of reflections for refinement.  R-factors based
 on F^2^ are statistically about twice as large as those based on F, and R-
 factors based on ALL data will be even larger.
;
_refine_ls_structure_factor_coef        Fsqd
_refine_ls_matrix_type                  full
_refine_ls_weighting_scheme             calc
_refine_ls_weighting_details
         'calc w=1/[\s^2^(Fo^2^)+(0.0281P)^2^+0.5678P] where P=(Fo^2^+2Fc^2^)/3'
_atom_sites_solution_primary            direct
_atom_sites_solution_secondary          difmap
_atom_sites_solution_hydrogens          geom
_refine_ls_hydrogen_treatment           constr
_refine_ls_extinction_method            none
_refine_ls_number_reflns                9792
_refine_ls_number_parameters            613
_refine_ls_number_restraints            0
_refine_ls_R_factor_all                 0.0269
_refine_ls_R_factor_gt                  0.0219
_refine_ls_wR_factor_ref                0.057
_refine_ls_wR_factor_gt                 0.0552
_refine_ls_goodness_of_fit_ref          1.063
_refine_ls_restrained_S_all             1.063
_refine_ls_shift/su_max                 0.001
_refine_ls_shift/su_mean                0
_refine_diff_density_max                0.375
_refine_diff_density_min                -0.255
_refine_diff_density_rms                0.057
 
#----------------------------------------------------------------------------#
#                   ATOMIC TYPES, COORDINATES AND THERMAL PARAMETERS         #
#----------------------------------------------------------------------------#
 
loop_
    _atom_type_symbol
    _atom_type_description
    _atom_type_scat_dispersion_real
    _atom_type_scat_dispersion_imag
    _atom_type_scat_source
C C 0.0033 0.0016 'International Tables Vol C Tables 4.2.6.8 and 6.1.1.4'
H H 0 0 'International Tables Vol C Tables 4.2.6.8 and 6.1.1.4'
Fe Fe 0.3463 0.8444 'International Tables Vol C Tables 4.2.6.8 and 6.1.1.4'
O O 0.0106 0.006 'International Tables Vol C Tables 4.2.6.8 and 6.1.1.4'
P P 0.1023 0.0942 'International Tables Vol C Tables 4.2.6.8 and 6.1.1.4'
F F 0.0171 0.0103 'International Tables Vol C Tables 4.2.6.8 and 6.1.1.4'
 
loop_
    _atom_site_label
    _atom_site_type_symbol
    _atom_site_fract_x
    _atom_site_fract_y
    _atom_site_fract_z
    _atom_site_U_iso_or_equiv
    _atom_site_adp_type
    _atom_site_occupancy
    _atom_site_symmetry_multiplicity
    _atom_site_calc_flag
    _atom_site_refinement_flags
    _atom_site_disorder_assembly
    _atom_site_disorder_group
Fe1 Fe 0.29396(2) 0.352601(16) 0.335340(17) 0.01777(6) Uani 1 1 d . . .
Fe2 Fe 0.10478(2) 0.382008(16) 0.200819(16) 0.01812(6) Uani 1 1 d . . .
Fe3 Fe 0.05394(2) 0.100597(16) 0.182797(15) 0.01486(5) Uani 1 1 d . . .
P1 P 0.09458(4) 0.26610(3) 0.26263(3) 0.01375(8) Uani 1 1 d . . .
O1 O 0.23499(13) 0.46380(9) 0.49997(9) 0.0309(3) Uani 1 1 d . . .
O2 O -0.04663(13) 0.50514(9) 0.29694(10) 0.0319(3) Uani 1 1 d . . .
O3 O 0.30889(13) 0.54286(9) 0.32334(11) 0.0363(3) Uani 1 1 d . . .
O4 O 0.21155(13) 0.08265(10) 0.36242(9) 0.0314(3) Uani 1 1 d . . .
O5 O -0.20958(12) 0.12173(10) 0.07690(9) 0.0333(3) Uani 1 1 d . . .
O6 O 0.21992(13) 0.08923(10) 0.07088(9) 0.0327(3) Uani 1 1 d . . .
O7 O -0.02925(12) -0.10738(9) 0.11247(10) 0.0315(3) Uani 1 1 d . . .
C1 C 0.25432(15) 0.41690(12) 0.43426(12) 0.0209(3) Uani 1 1 d . . .
C2 C 0.01444(17) 0.45448(12) 0.26260(12) 0.0221(4) Uani 1 1 d . . .
C3 C 0.25906(17) 0.46347(13) 0.29848(13) 0.0246(4) Uani 1 1 d . . .
C4 C 0.14656(16) 0.09216(12) 0.29417(12) 0.0196(3) Uani 1 1 d . . .
C5 C -0.10743(17) 0.11598(12) 0.12189(12) 0.0212(3) Uani 1 1 d . . .
C6 C 0.15416(17) 0.09686(12) 0.11461(12) 0.0212(3) Uani 1 1 d . . .
C7 C 0.00440(16) -0.02612(12) 0.13847(12) 0.0211(3) Uani 1 1 d . . .
C8 C 0.42859(17) 0.27349(14) 0.39766(14) 0.0282(4) Uani 1 1 d . . .
H8 H 0.4163 0.2445 0.438 0.034 Uiso 1 1 calc R . .
C9 C 0.39227(16) 0.23003(13) 0.29933(13) 0.0267(4) Uani 1 1 d . . .
H9 H 0.3531 0.1667 0.2633 0.032 Uiso 1 1 calc R . .
C10 C 0.42524(17) 0.29875(15) 0.26433(15) 0.0329(4) Uani 1 1 d . . .
H10 H 0.4104 0.2894 0.2013 0.039 Uiso 1 1 calc R . .
C11 C 0.48568(17) 0.38527(14) 0.34364(16) 0.0347(5) Uani 1 1 d . . .
H11 H 0.5182 0.4423 0.3414 0.042 Uiso 1 1 calc R . .
C12 C 0.48743(16) 0.36951(14) 0.42494(15) 0.0315(4) Uani 1 1 d . . .
H12 H 0.5213 0.4141 0.4864 0.038 Uiso 1 1 calc R . .
C13 C 0.1462(2) 0.30656(14) 0.07722(13) 0.0306(4) Uani 1 1 d . . .
H13 H 0.2016 0.2601 0.0731 0.037 Uiso 1 1 calc R . .
C14 C 0.0125(2) 0.28909(14) 0.05762(12) 0.0288(4) Uani 1 1 d . . .
H14 H -0.0363 0.2292 0.0376 0.035 Uiso 1 1 calc R . .
C15 C -0.0342(2) 0.37868(15) 0.07375(13) 0.0350(5) Uani 1 1 d . . .
H15 H -0.1194 0.3884 0.0668 0.042 Uiso 1 1 calc R . .
C16 C 0.0716(2) 0.45197(15) 0.10259(14) 0.0395(5) Uani 1 1 d . . .
H16 H 0.0678 0.5177 0.1175 0.047 Uiso 1 1 calc R . .
C17 C 0.1822(2) 0.40703(15) 0.10437(14) 0.0371(5) Uani 1 1 d . . .
H17 H 0.265 0.4378 0.1206 0.045 Uiso 1 1 calc R . .
C18 C -0.00426(15) 0.29810(11) 0.34042(11) 0.0155(3) Uani 1 1 d . . .
H18 H 0.0145 0.3683 0.3723 0.019 Uiso 1 1 calc R . .
C19 C 0.02862(16) 0.25561(12) 0.41899(12) 0.0201(3) Uani 1 1 d . . .
H19A H 0.1212 0.2689 0.4538 0.024 Uiso 1 1 calc R . .
H19B H 0.0036 0.1862 0.3914 0.024 Uiso 1 1 calc R . .
C20 C -0.04350(19) 0.30041(14) 0.48638(13) 0.0294(4) Uani 1 1 d . . .
H20A H -0.0246 0.2718 0.5347 0.035 Uiso 1 1 calc R . .
H20B H -0.013 0.369 0.5175 0.035 Uiso 1 1 calc R . .
C21 C -0.18917(19) 0.28493(15) 0.43421(15) 0.0336(4) Uani 1 1 d . . .
H21A H -0.2307 0.3194 0.4777 0.04 Uiso 1 1 calc R . .
H21B H -0.2218 0.2168 0.4112 0.04 Uiso 1 1 calc R . .
C22 C -0.22353(18) 0.32004(15) 0.35113(14) 0.0296(4) Uani 1 1 d . . .
H22A H -0.2026 0.3897 0.3749 0.036 Uiso 1 1 calc R . .
H22B H -0.3159 0.3035 0.3159 0.036 Uiso 1 1 calc R . .
C23 C -0.15042(15) 0.27515(12) 0.28519(12) 0.0208(3) Uani 1 1 d . . .
H23A H -0.1719 0.3005 0.2344 0.025 Uiso 1 1 calc R . .
H23B H -0.176 0.2058 0.2574 0.025 Uiso 1 1 calc R . .
Fe51 Fe -0.32122(2) -0.084009(16) 0.308470(16) 0.01684(6) Uani 1 1 d . . .
Fe52 Fe -0.46609(2) -0.146460(16) 0.128536(16) 0.01560(6) Uani 1 1 d . . .
Fe53 Fe -0.41013(2) -0.378147(16) 0.207669(16) 0.01781(6) Uani 1 1 d . . .
P51 P -0.46247(4) -0.22294(3) 0.22989(3) 0.01483(8) Uani 1 1 d . . .
O51 O -0.48998(13) 0.02005(10) 0.40080(10) 0.0347(3) Uani 1 1 d . . .
O52 O -0.71364(13) -0.08514(11) 0.12989(10) 0.0346(3) Uani 1 1 d . . .
O53 O -0.37738(13) 0.05983(9) 0.21921(9) 0.0306(3) Uani 1 1 d . . .
O54 O -0.35333(14) -0.33099(11) 0.41071(9) 0.0403(4) Uani 1 1 d . . .
O55 O -0.17767(13) -0.35337(10) 0.16240(11) 0.0361(3) Uani 1 1 d . . .
O56 O -0.64367(13) -0.44876(10) 0.03587(9) 0.0331(3) Uani 1 1 d . . .
O57 O -0.36828(16) -0.57671(10) 0.18921(11) 0.0452(4) Uani 1 1 d . . .
C51 C -0.42751(17) -0.02437(12) 0.36262(12) 0.0239(4) Uani 1 1 d . . .
C52 C -0.61556(17) -0.10995(12) 0.13148(12) 0.0217(4) Uani 1 1 d . . .
C53 C -0.38466(16) -0.01927(12) 0.21891(12) 0.0218(4) Uani 1 1 d . . .
C54 C -0.38014(17) -0.34907(13) 0.33060(13) 0.0249(4) Uani 1 1 d . . .
C55 C -0.26911(17) -0.35884(13) 0.18099(13) 0.0250(4) Uani 1 1 d . . .
C56 C -0.55514(17) -0.41948(12) 0.10540(13) 0.0227(4) Uani 1 1 d . . .
C57 C -0.38448(19) -0.49916(13) 0.19605(13) 0.0282(4) Uani 1 1 d . . .
C58 C -0.16735(16) -0.15284(14) 0.36982(14) 0.0289(4) Uani 1 1 d . . .
H58 H -0.1759 -0.2159 0.3681 0.035 Uiso 1 1 calc R . .
C59 C -0.13757(16) -0.12307(13) 0.30323(13) 0.0265(4) Uani 1 1 d . . .
H59 H -0.1236 -0.163 0.2497 0.032 Uiso 1 1 calc R . .
C60 C -0.13262(16) -0.02157(13) 0.33222(13) 0.0260(4) Uani 1 1 d . . .
H60 H -0.1144 0.0167 0.3011 0.031 Uiso 1 1 calc R . .
C61 C -0.15978(17) 0.01126(14) 0.41578(13) 0.0278(4) Uani 1 1 d . . .
H61 H -0.1628 0.075 0.4498 0.033 Uiso 1 1 calc R . .
C62 C -0.18196(17) -0.07058(15) 0.43955(13) 0.0304(4) Uani 1 1 d . . .
H62 H -0.2023 -0.0697 0.4916 0.036 Uiso 1 1 calc R . .
C63 C -0.44225(17) -0.27066(13) 0.02292(12) 0.0228(4) Uani 1 1 d . . .
H63 H -0.4477 -0.3335 0.0221 0.027 Uiso 1 1 calc R . .
C64 C -0.54593(17) -0.22591(13) -0.01710(12) 0.0230(4) Uani 1 1 d . . .
H64 H -0.6321 -0.2538 -0.0482 0.028 Uiso 1 1 calc R . .
C65 C -0.49513(17) -0.12996(13) -0.00149(12) 0.0240(4) Uani 1 1 d . . .
H65 H -0.5422 -0.0847 -0.0211 0.029 Uiso 1 1 calc R . .
C66 C -0.36153(17) -0.11658(13) 0.04882(12) 0.0245(4) Uani 1 1 d . . .
H66 H -0.3045 -0.0606 0.0685 0.029 Uiso 1 1 calc R . .
C67 C -0.32843(17) -0.20284(13) 0.06444(12) 0.0241(4) Uani 1 1 d . . .
H67 H -0.246 -0.2131 0.0965 0.029 Uiso 1 1 calc R . .
C68 C -0.60962(15) -0.20993(12) 0.26499(11) 0.0169(3) Uani 1 1 d . . .
H68 H -0.6299 -0.145 0.2687 0.02 Uiso 1 1 calc R . .
C69 C -0.59005(16) -0.21425(12) 0.36301(12) 0.0206(3) Uani 1 1 d . . .
H69A H -0.5786 -0.2793 0.3618 0.025 Uiso 1 1 calc R . .
H69B H -0.5127 -0.1712 0.4096 0.025 Uiso 1 1 calc R . .
C70 C -0.70779(18) -0.18462(14) 0.39051(13) 0.0281(4) Uani 1 1 d . . .
H70A H -0.6955 -0.1889 0.4518 0.034 Uiso 1 1 calc R . .
H70B H -0.7154 -0.1181 0.3958 0.034 Uiso 1 1 calc R . .
C71 C -0.83166(17) -0.24886(14) 0.31769(14) 0.0299(4) Uani 1 1 d . . .
H71A H -0.905 -0.2254 0.3344 0.036 Uiso 1 1 calc R . .
H71B H -0.8286 -0.314 0.3181 0.036 Uiso 1 1 calc R . .
C72 C -0.84975(17) -0.25026(14) 0.21863(14) 0.0282(4) Uani 1 1 d . . .
H72A H -0.8641 -0.1868 0.2161 0.034 Uiso 1 1 calc R . .
H72B H -0.9256 -0.2956 0.1731 0.034 Uiso 1 1 calc R . .
C73 C -0.73094(15) -0.27918(12) 0.19203(12) 0.0218(4) Uani 1 1 d . . .
H73A H -0.72 -0.3445 0.1898 0.026 Uiso 1 1 calc R . .
H73B H -0.7437 -0.2773 0.1298 0.026 Uiso 1 1 calc R . .
 
loop_
    _atom_site_aniso_label
    _atom_site_aniso_U_11
    _atom_site_aniso_U_22
    _atom_site_aniso_U_33
    _atom_site_aniso_U_23
    _atom_site_aniso_U_13
    _atom_site_aniso_U_12
Fe1 0.01252(11) 0.01581(12) 0.02315(12) 0.00480(10) 0.00629(9) 0.00090(9)
Fe2 0.02106(12) 0.01550(12) 0.02001(12) 0.00741(9) 0.00897(10) 0.00327(9)
Fe3 0.01595(11) 0.01319(11) 0.01489(11) 0.00400(9) 0.00583(9) 0.00197(9)
P1 0.01283(19) 0.01337(19) 0.01464(19) 0.00401(15) 0.00541(15) 0.00162(15)
O1 0.0308(7) 0.0260(7) 0.0262(7) -0.0015(6) 0.0092(6) 0.0019(5)
O2 0.0359(8) 0.0273(7) 0.0354(7) 0.0101(6) 0.0170(6) 0.0151(6)
O3 0.0303(7) 0.0204(7) 0.0532(9) 0.0141(6) 0.0082(7) -0.0039(6)
O4 0.0355(7) 0.0383(8) 0.0241(7) 0.0170(6) 0.0091(6) 0.0131(6)
O5 0.0250(7) 0.0320(7) 0.0286(7) 0.0045(6) -0.0022(6) 0.0079(6)
O6 0.0432(8) 0.0337(8) 0.0328(7) 0.0133(6) 0.0264(7) 0.0092(6)
O7 0.0293(7) 0.0168(7) 0.0397(8) 0.0082(6) 0.0037(6) 0.0003(5)
C1 0.0136(8) 0.0174(8) 0.0255(9) 0.0053(7) 0.0017(7) -0.0005(6)
C2 0.0250(9) 0.0175(8) 0.0217(8) 0.0078(7) 0.0048(7) 0.0013(7)
C3 0.0205(9) 0.0217(9) 0.0331(10) 0.0106(8) 0.0106(8) 0.0038(7)
C4 0.0229(9) 0.0177(8) 0.0211(8) 0.0066(7) 0.0116(7) 0.0042(7)
C5 0.0244(9) 0.0145(8) 0.0205(8) 0.0026(7) 0.0063(7) 0.0020(7)
C6 0.0270(9) 0.0164(8) 0.0185(8) 0.0051(7) 0.0072(7) 0.0025(7)
C7 0.0177(8) 0.0212(9) 0.0219(8) 0.0074(7) 0.0043(7) 0.0039(7)
C8 0.0180(9) 0.0310(10) 0.0355(10) 0.0135(8) 0.0074(8) 0.0108(7)
C9 0.0135(8) 0.0227(9) 0.0365(10) 0.0037(8) 0.0065(8) 0.0055(7)
C10 0.0188(9) 0.0477(12) 0.0385(11) 0.0168(10) 0.0163(8) 0.0121(8)
C11 0.0152(9) 0.0298(10) 0.0636(14) 0.0181(10) 0.0182(9) 0.0035(7)
C12 0.0130(8) 0.0303(10) 0.0379(11) 0.0026(8) 0.0019(8) 0.0049(7)
C13 0.0447(12) 0.0311(10) 0.0262(9) 0.0131(8) 0.0220(9) 0.0105(9)
C14 0.0437(11) 0.0256(10) 0.0160(8) 0.0066(7) 0.0104(8) 0.0016(8)
C15 0.0421(12) 0.0429(12) 0.0193(9) 0.0135(9) 0.0071(8) 0.0150(10)
C16 0.0686(15) 0.0258(10) 0.0305(11) 0.0182(9) 0.0171(10) 0.0106(10)
C17 0.0510(13) 0.0360(11) 0.0358(11) 0.0185(9) 0.0243(10) -0.0012(10)
C18 0.0147(8) 0.0143(8) 0.0166(8) 0.0031(6) 0.0069(6) 0.0025(6)
C19 0.0205(8) 0.0226(9) 0.0195(8) 0.0087(7) 0.0088(7) 0.0053(7)
C20 0.0390(11) 0.0349(11) 0.0238(9) 0.0129(8) 0.0202(8) 0.0125(9)
C21 0.0347(11) 0.0392(11) 0.0422(11) 0.0177(9) 0.0291(10) 0.0154(9)
C22 0.0218(9) 0.0381(11) 0.0342(10) 0.0129(9) 0.0162(8) 0.0131(8)
C23 0.0151(8) 0.0230(9) 0.0240(9) 0.0072(7) 0.0079(7) 0.0045(7)
Fe51 0.01576(12) 0.01690(12) 0.01742(12) 0.00618(9) 0.00542(9) -0.00035(9)
Fe52 0.01453(11) 0.01764(12) 0.01704(11) 0.00793(9) 0.00690(9) 0.00191(9)
Fe53 0.01893(12) 0.01549(12) 0.02059(12) 0.00744(9) 0.00795(10) 0.00346(9)
P51 0.01381(19) 0.0153(2) 0.0169(2) 0.00672(16) 0.00630(16) 0.00136(15)
O51 0.0358(8) 0.0293(7) 0.0368(8) 0.0012(6) 0.0209(7) 0.0040(6)
O52 0.0279(7) 0.0523(9) 0.0440(8) 0.0338(7) 0.0207(6) 0.0223(7)
O53 0.0391(8) 0.0190(7) 0.0330(7) 0.0127(6) 0.0086(6) 0.0005(6)
O54 0.0425(9) 0.0570(10) 0.0240(7) 0.0187(7) 0.0099(6) 0.0236(7)
O55 0.0272(7) 0.0381(8) 0.0507(9) 0.0170(7) 0.0222(7) 0.0075(6)
O56 0.0277(7) 0.0354(8) 0.0269(7) 0.0041(6) 0.0055(6) -0.0030(6)
O57 0.0662(11) 0.0209(7) 0.0411(9) 0.0104(6) 0.0103(8) 0.0131(7)
C51 0.0262(9) 0.0197(9) 0.0199(8) 0.0037(7) 0.0047(7) -0.0047(7)
C52 0.0243(9) 0.0247(9) 0.0204(8) 0.0133(7) 0.0081(7) 0.0039(7)
C53 0.0206(9) 0.0234(9) 0.0217(8) 0.0085(7) 0.0075(7) 0.0011(7)
C54 0.0241(9) 0.0222(9) 0.0297(10) 0.0119(8) 0.0083(8) 0.0087(7)
C55 0.0255(9) 0.0206(9) 0.0301(10) 0.0103(7) 0.0103(8) 0.0055(7)
C56 0.0258(9) 0.0183(8) 0.0279(9) 0.0080(7) 0.0146(8) 0.0029(7)
C57 0.0338(10) 0.0234(10) 0.0245(9) 0.0083(8) 0.0070(8) 0.0052(8)
C58 0.0165(8) 0.0274(10) 0.0377(11) 0.0168(8) -0.0020(8) -0.0001(7)
C59 0.0137(8) 0.0316(10) 0.0263(9) 0.0050(8) 0.0026(7) 0.0020(7)
C60 0.0171(8) 0.0304(10) 0.0283(9) 0.0119(8) 0.0043(7) -0.0064(7)
C61 0.0211(9) 0.0256(10) 0.0262(9) 0.0030(8) 0.0020(7) -0.0040(7)
C62 0.0201(9) 0.0478(12) 0.0212(9) 0.0169(9) 0.0005(7) -0.0033(8)
C63 0.0292(9) 0.0240(9) 0.0199(8) 0.0072(7) 0.0153(7) 0.0057(7)
C64 0.0236(9) 0.0261(9) 0.0166(8) 0.0047(7) 0.0066(7) 0.0008(7)
C65 0.0292(9) 0.0280(9) 0.0199(8) 0.0128(7) 0.0106(7) 0.0052(7)
C66 0.0250(9) 0.0305(10) 0.0241(9) 0.0115(8) 0.0148(8) -0.0008(7)
C67 0.0209(9) 0.0368(10) 0.0202(8) 0.0116(8) 0.0127(7) 0.0076(7)
C68 0.0163(8) 0.0176(8) 0.0212(8) 0.0096(7) 0.0093(7) 0.0032(6)
C69 0.0221(9) 0.0227(9) 0.0220(8) 0.0111(7) 0.0109(7) 0.0043(7)
C70 0.0334(10) 0.0313(10) 0.0323(10) 0.0160(8) 0.0225(9) 0.0107(8)
C71 0.0233(9) 0.0370(11) 0.0452(12) 0.0234(9) 0.0229(9) 0.0107(8)
C72 0.0168(9) 0.0329(10) 0.0400(11) 0.0181(9) 0.0115(8) 0.0050(7)
C73 0.0174(8) 0.0233(9) 0.0259(9) 0.0098(7) 0.0083(7) 0.0011(7)
 
 
#----------------------------------------------------------------------------#
#                   MOLECULAR GEOMETRY                                       #
#----------------------------------------------------------------------------#
 
_geom_special_details
;
 All esds (except the esd in the dihedral angle between two l.s. planes)
 are estimated using the full covariance matrix.  The cell esds are taken
 into account individually in the estimation of esds in distances, angles
 and torsion angles; correlations between esds in cell parameters are only
 used when they are defined by crystal symmetry.  An approximate (isotropic)
 treatment of cell esds is used for estimating esds involving l.s. planes.
;
loop_
    _geom_bond_atom_site_label_1
    _geom_bond_atom_site_label_2
    _geom_bond_distance
    _geom_bond_site_symmetry_2
    _geom_bond_publ_flag
Fe1 C1 1.7567(18) . ?
Fe1 C3 1.9295(17) . ?
Fe1 C12 2.1016(18) . ?
Fe1 C8 2.1090(18) . ?
Fe1 C11 2.1172(18) . ?
Fe1 C10 2.1368(18) . ?
Fe1 C9 2.1460(17) . ?
Fe1 P1 2.2548(5) . ?
Fe1 Fe2 2.6260(4) . ?
Fe2 C2 1.7653(18) . ?
Fe2 C3 1.9329(18) . ?
Fe2 C15 2.0927(19) . ?
Fe2 C16 2.1005(18) . ?
Fe2 C17 2.1230(19) . ?
Fe2 C14 2.1262(18) . ?
Fe2 C13 2.1294(18) . ?
Fe2 P1 2.2706(5) . ?
Fe3 C7 1.7789(17) . ?
Fe3 C6 1.7853(17) . ?
Fe3 C5 1.7888(17) . ?
Fe3 C4 1.7888(17) . ?
Fe3 P1 2.3177(5) . ?
P1 C18 1.8704(16) . ?
O1 C1 1.143(2) . ?
O2 C2 1.145(2) . ?
O3 C3 1.172(2) . ?
O4 C4 1.149(2) . ?
O5 C5 1.144(2) . ?
O6 C6 1.149(2) . ?
O7 C7 1.147(2) . ?
C8 C9 1.401(3) . ?
C8 C12 1.419(3) . ?
C8 H8 0.93 . ?
C9 C10 1.411(3) . ?
C9 H9 0.93 . ?
C10 C11 1.428(3) . ?
C10 H10 0.93 . ?
C11 C12 1.393(3) . ?
C11 H11 0.93 . ?
C12 H12 0.93 . ?
C13 C14 1.406(3) . ?
C13 C17 1.417(3) . ?
C13 H13 0.93 . ?
C14 C15 1.409(3) . ?
C14 H14 0.93 . ?
C15 C16 1.426(3) . ?
C15 H15 0.93 . ?
C16 C17 1.399(3) . ?
C16 H16 0.93 . ?
C17 H17 0.93 . ?
C18 C23 1.532(2) . ?
C18 C19 1.533(2) . ?
C18 H18 0.98 . ?
C19 C20 1.534(2) . ?
C19 H19A 0.97 . ?
C19 H19B 0.97 . ?
C20 C21 1.522(3) . ?
C20 H20A 0.97 . ?
C20 H20B 0.97 . ?
C21 C22 1.525(3) . ?
C21 H21A 0.97 . ?
C21 H21B 0.97 . ?
C22 C23 1.526(2) . ?
C22 H22A 0.97 . ?
C22 H22B 0.97 . ?
C23 H23A 0.97 . ?
C23 H23B 0.97 . ?
Fe51 C51 1.7650(19) . ?
Fe51 C53 1.9370(17) . ?
Fe51 C62 2.0986(17) . ?
Fe51 C61 2.1026(18) . ?
Fe51 C58 2.1272(18) . ?
Fe51 C60 2.1282(17) . ?
Fe51 C59 2.1409(17) . ?
Fe51 P51 2.2692(6) . ?
Fe51 Fe52 2.6220(5) . ?
Fe52 C52 1.7579(18) . ?
Fe52 C53 1.9342(18) . ?
Fe52 C64 2.0976(17) . ?
Fe52 C65 2.1002(16) . ?
Fe52 C66 2.1218(16) . ?
Fe52 C63 2.1385(17) . ?
Fe52 C67 2.1389(17) . ?
Fe52 P51 2.2618(5) . ?
Fe53 C57 1.7807(19) . ?
Fe53 C54 1.7836(19) . ?
Fe53 C56 1.7890(18) . ?
Fe53 C55 1.7895(18) . ?
Fe53 P51 2.3246(5) . ?
P51 C68 1.8823(16) . ?
O51 C51 1.146(2) . ?
O52 C52 1.146(2) . ?
O53 C53 1.174(2) . ?
O54 C54 1.152(2) . ?
O55 C55 1.153(2) . ?
O56 C56 1.155(2) . ?
O57 C57 1.142(2) . ?
C58 C59 1.409(3) . ?
C58 C62 1.409(3) . ?
C58 H58 0.93 . ?
C59 C60 1.416(3) . ?
C59 H59 0.93 . ?
C60 C61 1.400(3) . ?
C60 H60 0.93 . ?
C61 C62 1.429(3) . ?
C61 H61 0.93 . ?
C62 H62 0.93 . ?
C63 C64 1.410(2) . ?
C63 C67 1.414(2) . ?
C63 H63 0.93 . ?
C64 C65 1.432(2) . ?
C64 H64 0.93 . ?
C65 C66 1.403(2) . ?
C65 H65 0.93 . ?
C66 C67 1.416(3) . ?
C66 H66 0.93 . ?
C67 H67 0.93 . ?
C68 C73 1.531(2) . ?
C68 C69 1.538(2) . ?
C68 H68 0.98 . ?
C69 C70 1.533(2) . ?
C69 H69A 0.97 . ?
C69 H69B 0.97 . ?
C70 C71 1.520(3) . ?
C70 H70A 0.97 . ?
C70 H70B 0.97 . ?
C71 C72 1.527(3) . ?
C71 H71A 0.97 . ?
C71 H71B 0.97 . ?
C72 C73 1.535(2) . ?
C72 H72A 0.97 . ?
C72 H72B 0.97 . ?
C73 H73A 0.97 . ?
C73 H73B 0.97 . ?
 
loop_
    _geom_angle_atom_site_label_1
    _geom_angle_atom_site_label_2
    _geom_angle_atom_site_label_3
    _geom_angle
    _geom_angle_site_symmetry_1
    _geom_angle_site_symmetry_3
    _geom_angle_publ_flag
C1 Fe1 C3 85.66(8) . . ?
C1 Fe1 C12 89.22(8) . . ?
C3 Fe1 C12 111.00(8) . . ?
C1 Fe1 C8 98.56(8) . . ?
C3 Fe1 C8 149.44(7) . . ?
C12 Fe1 C8 39.39(7) . . ?
C1 Fe1 C11 116.72(8) . . ?
C3 Fe1 C11 85.77(8) . . ?
C12 Fe1 C11 38.56(8) . . ?
C8 Fe1 C11 65.20(8) . . ?
C1 Fe1 C10 154.07(8) . . ?
C3 Fe1 C10 98.96(8) . . ?
C12 Fe1 C10 65.23(8) . . ?
C8 Fe1 C10 64.93(8) . . ?
C11 Fe1 C10 39.23(8) . . ?
C1 Fe1 C9 135.08(8) . . ?
C3 Fe1 C9 136.75(8) . . ?
C12 Fe1 C9 65.01(7) . . ?
C8 Fe1 C9 38.43(7) . . ?
C11 Fe1 C9 64.90(7) . . ?
C10 Fe1 C9 38.48(7) . . ?
C1 Fe1 P1 90.76(5) . . ?
C3 Fe1 P1 99.47(5) . . ?
C12 Fe1 P1 149.44(6) . . ?
C8 Fe1 P1 110.66(5) . . ?
C11 Fe1 P1 152.42(6) . . ?
C10 Fe1 P1 113.33(6) . . ?
C9 Fe1 P1 94.52(5) . . ?
C1 Fe1 Fe2 100.20(5) . . ?
C3 Fe1 Fe2 47.22(5) . . ?
C12 Fe1 Fe2 154.57(6) . . ?
C8 Fe1 Fe2 156.24(5) . . ?
C11 Fe1 Fe2 117.62(6) . . ?
C10 Fe1 Fe2 101.57(6) . . ?
C9 Fe1 Fe2 119.04(5) . . ?
P1 Fe1 Fe2 54.812(14) . . ?
C2 Fe2 C3 87.65(8) . . ?
C2 Fe2 C15 89.01(8) . . ?
C3 Fe2 C15 139.05(8) . . ?
C2 Fe2 C16 93.59(8) . . ?
C3 Fe2 C16 99.77(8) . . ?
C15 Fe2 C16 39.77(8) . . ?
C2 Fe2 C17 128.94(8) . . ?
C3 Fe2 C17 85.59(8) . . ?
C15 Fe2 C17 65.46(9) . . ?
C16 Fe2 C17 38.67(8) . . ?
C2 Fe2 C14 120.30(8) . . ?
C3 Fe2 C14 148.03(8) . . ?
C15 Fe2 C14 39.00(7) . . ?
C16 Fe2 C14 65.81(8) . . ?
C17 Fe2 C14 65.18(8) . . ?
C2 Fe2 C13 154.00(8) . . ?
C3 Fe2 C13 109.84(8) . . ?
C15 Fe2 C13 65.12(8) . . ?
C16 Fe2 C13 65.24(8) . . ?
C17 Fe2 C13 38.92(7) . . ?
C14 Fe2 C13 38.60(8) . . ?
C2 Fe2 P1 92.96(6) . . ?
C3 Fe2 P1 98.83(5) . . ?
C15 Fe2 P1 122.11(6) . . ?
C16 Fe2 P1 160.50(6) . . ?
C17 Fe2 P1 138.09(6) . . ?
C14 Fe2 P1 95.10(5) . . ?
C13 Fe2 P1 102.74(5) . . ?
C2 Fe2 Fe1 103.28(6) . . ?
C3 Fe2 Fe1 47.11(5) . . ?
C15 Fe2 Fe1 167.09(6) . . ?
C16 Fe2 Fe1 140.89(7) . . ?
C17 Fe2 Fe1 108.27(6) . . ?
C14 Fe2 Fe1 128.54(5) . . ?
C13 Fe2 Fe1 102.71(6) . . ?
P1 Fe2 Fe1 54.249(15) . . ?
C7 Fe3 C6 95.89(8) . . ?
C7 Fe3 C5 89.32(7) . . ?
C6 Fe3 C5 111.08(8) . . ?
C7 Fe3 C4 88.47(8) . . ?
C6 Fe3 C4 110.23(8) . . ?
C5 Fe3 C4 138.64(8) . . ?
C7 Fe3 P1 167.48(6) . . ?
C6 Fe3 P1 96.55(6) . . ?
C5 Fe3 P1 87.55(5) . . ?
C4 Fe3 P1 85.89(5) . . ?
C18 P1 Fe1 111.43(5) . . ?
C18 P1 Fe2 110.30(5) . . ?
Fe1 P1 Fe2 70.939(16) . . ?
C18 P1 Fe3 108.42(5) . . ?
Fe1 P1 Fe3 124.22(2) . . ?
Fe2 P1 Fe3 127.01(2) . . ?
O1 C1 Fe1 175.26(15) . . ?
O2 C2 Fe2 174.11(15) . . ?
O3 C3 Fe1 137.07(15) . . ?
O3 C3 Fe2 137.26(15) . . ?
Fe1 C3 Fe2 85.67(7) . . ?
O4 C4 Fe3 174.94(15) . . ?
O5 C5 Fe3 174.97(16) . . ?
O6 C6 Fe3 176.03(15) . . ?
O7 C7 Fe3 177.53(16) . . ?
C9 C8 C12 108.10(18) . . ?
C9 C8 Fe1 72.22(10) . . ?
C12 C8 Fe1 70.02(10) . . ?
C9 C8 H8 126 . . ?
C12 C8 H8 126 . . ?
Fe1 C8 H8 123.4 . . ?
C8 C9 C10 108.29(17) . . ?
C8 C9 Fe1 69.36(10) . . ?
C10 C9 Fe1 70.40(10) . . ?
C8 C9 H9 125.9 . . ?
C10 C9 H9 125.9 . . ?
Fe1 C9 H9 126 . . ?
C9 C10 C11 107.33(18) . . ?
C9 C10 Fe1 71.11(10) . . ?
C11 C10 Fe1 69.64(11) . . ?
C9 C10 H10 126.3 . . ?
C11 C10 H10 126.3 . . ?
Fe1 C10 H10 124.5 . . ?
C12 C11 C10 108.15(17) . . ?
C12 C11 Fe1 70.11(10) . . ?
C10 C11 Fe1 71.13(10) . . ?
C12 C11 H11 125.9 . . ?
C10 C11 H11 125.9 . . ?
Fe1 C11 H11 124.4 . . ?
C11 C12 C8 108.11(18) . . ?
C11 C12 Fe1 71.32(11) . . ?
C8 C12 Fe1 70.59(10) . . ?
C11 C12 H12 125.9 . . ?
C8 C12 H12 125.9 . . ?
Fe1 C12 H12 123.8 . . ?
C14 C13 C17 108.34(18) . . ?
C14 C13 Fe2 70.58(10) . . ?
C17 C13 Fe2 70.29(11) . . ?
C14 C13 H13 125.8 . . ?
C17 C13 H13 125.8 . . ?
Fe2 C13 H13 124.9 . . ?
C13 C14 C15 107.66(18) . . ?
C13 C14 Fe2 70.83(11) . . ?
C15 C14 Fe2 69.22(11) . . ?
C13 C14 H14 126.2 . . ?
C15 C14 H14 126.2 . . ?
Fe2 C14 H14 125.4 . . ?
C14 C15 C16 108.19(19) . . ?
C14 C15 Fe2 71.78(11) . . ?
C16 C15 Fe2 70.41(11) . . ?
C14 C15 H15 125.9 . . ?
C16 C15 H15 125.9 . . ?
Fe2 C15 H15 123.5 . . ?
C17 C16 C15 107.60(18) . . ?
C17 C16 Fe2 71.53(11) . . ?
C15 C16 Fe2 69.82(10) . . ?
C17 C16 H16 126.2 . . ?
C15 C16 H16 126.2 . . ?
Fe2 C16 H16 124.1 . . ?
C16 C17 C13 108.21(19) . . ?
C16 C17 Fe2 69.80(11) . . ?
C13 C17 Fe2 70.79(10) . . ?
C16 C17 H17 125.9 . . ?
C13 C17 H17 125.9 . . ?
Fe2 C17 H17 125.1 . . ?
C23 C18 C19 109.08(13) . . ?
C23 C18 P1 113.26(11) . . ?
C19 C18 P1 115.36(11) . . ?
C23 C18 H18 106.1 . . ?
C19 C18 H18 106.1 . . ?
P1 C18 H18 106.1 . . ?
C18 C19 C20 109.63(13) . . ?
C18 C19 H19A 109.7 . . ?
C20 C19 H19A 109.7 . . ?
C18 C19 H19B 109.7 . . ?
C20 C19 H19B 109.7 . . ?
H19A C19 H19B 108.2 . . ?
C21 C20 C19 111.68(15) . . ?
C21 C20 H20A 109.3 . . ?
C19 C20 H20A 109.3 . . ?
C21 C20 H20B 109.3 . . ?
C19 C20 H20B 109.3 . . ?
H20A C20 H20B 107.9 . . ?
C20 C21 C22 111.46(15) . . ?
C20 C21 H21A 109.3 . . ?
C22 C21 H21A 109.3 . . ?
C20 C21 H21B 109.3 . . ?
C22 C21 H21B 109.3 . . ?
H21A C21 H21B 108 . . ?
C21 C22 C23 111.55(15) . . ?
C21 C22 H22A 109.3 . . ?
C23 C22 H22A 109.3 . . ?
C21 C22 H22B 109.3 . . ?
C23 C22 H22B 109.3 . . ?
H22A C22 H22B 108 . . ?
C22 C23 C18 109.97(14) . . ?
C22 C23 H23A 109.7 . . ?
C18 C23 H23A 109.7 . . ?
C22 C23 H23B 109.7 . . ?
C18 C23 H23B 109.7 . . ?
H23A C23 H23B 108.2 . . ?
C51 Fe51 C53 85.89(8) . . ?
C51 Fe51 C62 91.97(8) . . ?
C53 Fe51 C62 144.00(8) . . ?
C51 Fe51 C61 91.66(8) . . ?
C53 Fe51 C61 104.31(7) . . ?
C62 Fe51 C61 39.76(7) . . ?
C51 Fe51 C58 125.75(8) . . ?
C53 Fe51 C58 145.45(7) . . ?
C62 Fe51 C58 38.95(8) . . ?
C61 Fe51 C58 65.55(7) . . ?
C51 Fe51 C60 124.73(8) . . ?
C53 Fe51 C60 86.44(7) . . ?
C62 Fe51 C60 65.49(7) . . ?
C61 Fe51 C60 38.64(7) . . ?
C58 Fe51 C60 64.92(7) . . ?
C51 Fe51 C59 155.36(7) . . ?
C53 Fe51 C59 106.90(7) . . ?
C62 Fe51 C59 65.18(7) . . ?
C61 Fe51 C59 65.08(7) . . ?
C58 Fe51 C59 38.55(7) . . ?
C60 Fe51 C59 38.73(7) . . ?
C51 Fe51 P51 92.55(6) . . ?
C53 Fe51 P51 99.02(5) . . ?
C62 Fe51 P51 116.98(6) . . ?
C61 Fe51 P51 156.53(5) . . ?
C58 Fe51 P51 93.53(5) . . ?
C60 Fe51 P51 142.69(5) . . ?
C59 Fe51 P51 105.70(5) . . ?
C51 Fe51 Fe52 102.27(6) . . ?
C53 Fe51 Fe52 47.32(5) . . ?
C62 Fe51 Fe52 163.36(6) . . ?
C61 Fe51 Fe52 146.12(5) . . ?
C58 Fe51 Fe52 124.43(6) . . ?
C60 Fe51 Fe52 111.55(5) . . ?
C59 Fe51 Fe52 101.81(5) . . ?
P51 Fe51 Fe52 54.511(14) . . ?
C52 Fe52 C53 87.77(8) . . ?
C52 Fe52 C64 92.11(7) . . ?
C53 Fe52 C64 142.37(7) . . ?
C52 Fe52 C65 92.89(7) . . ?
C53 Fe52 C65 102.50(7) . . ?
C64 Fe52 C65 39.89(7) . . ?
C52 Fe52 C66 126.53(7) . . ?
C53 Fe52 C66 84.43(7) . . ?
C64 Fe52 C66 65.69(7) . . ?
C65 Fe52 C66 38.82(7) . . ?
C52 Fe52 C63 125.08(8) . . ?
C53 Fe52 C63 144.15(7) . . ?
C64 Fe52 C63 38.88(7) . . ?
C65 Fe52 C63 65.71(7) . . ?
C66 Fe52 C63 65.12(7) . . ?
C52 Fe52 C67 156.14(7) . . ?
C53 Fe52 C67 105.55(7) . . ?
C64 Fe52 C67 65.19(7) . . ?
C65 Fe52 C67 65.24(7) . . ?
C66 Fe52 C67 38.81(7) . . ?
C63 Fe52 C67 38.62(7) . . ?
C52 Fe52 P51 90.36(5) . . ?
C53 Fe52 P51 99.35(5) . . ?
C64 Fe52 P51 118.27(5) . . ?
C65 Fe52 P51 158.00(5) . . ?
C66 Fe52 P51 143.11(5) . . ?
C63 Fe52 P51 94.81(5) . . ?
C67 Fe52 P51 106.44(5) . . ?
C52 Fe52 Fe51 102.31(6) . . ?
C53 Fe52 Fe51 47.41(5) . . ?
C64 Fe52 Fe51 163.64(5) . . ?
C65 Fe52 Fe51 144.63(5) . . ?
C66 Fe52 Fe51 110.10(5) . . ?
C63 Fe52 Fe51 124.77(5) . . ?
C67 Fe52 Fe51 101.24(5) . . ?
P51 Fe52 Fe51 54.774(15) . . ?
C57 Fe53 C54 90.04(8) . . ?
C57 Fe53 C56 90.94(8) . . ?
C54 Fe53 C56 132.50(8) . . ?
C57 Fe53 C55 90.91(8) . . ?
C54 Fe53 C55 114.21(8) . . ?
C56 Fe53 C55 113.25(8) . . ?
C57 Fe53 P51 173.19(6) . . ?
C54 Fe53 P51 86.20(6) . . ?
C56 Fe53 P51 87.43(6) . . ?
C55 Fe53 P51 95.81(6) . . ?
C68 P51 Fe52 111.69(5) . . ?
C68 P51 Fe51 110.03(5) . . ?
Fe52 P51 Fe51 70.715(16) . . ?
C68 P51 Fe53 109.97(5) . . ?
Fe52 P51 Fe53 123.15(2) . . ?
Fe51 P51 Fe53 126.08(2) . . ?
O51 C51 Fe51 175.13(15) . . ?
O52 C52 Fe52 176.94(15) . . ?
O53 C53 Fe52 137.29(14) . . ?
O53 C53 Fe51 137.44(14) . . ?
Fe52 C53 Fe51 85.27(7) . . ?
O54 C54 Fe53 175.99(16) . . ?
O55 C55 Fe53 175.08(16) . . ?
O56 C56 Fe53 175.42(16) . . ?
O57 C57 Fe53 179.45(19) . . ?
C59 C58 C62 108.27(16) . . ?
C59 C58 Fe51 71.26(10) . . ?
C62 C58 Fe51 69.43(10) . . ?
C59 C58 H58 125.9 . . ?
C62 C58 H58 125.9 . . ?
Fe51 C58 H58 125 . . ?
C58 C59 C60 107.92(17) . . ?
C58 C59 Fe51 70.20(10) . . ?
C60 C59 Fe51 70.15(10) . . ?
C58 C59 H59 126 . . ?
C60 C59 H59 126 . . ?
Fe51 C59 H59 125.2 . . ?
C61 C60 C59 108.35(16) . . ?
C61 C60 Fe51 69.69(10) . . ?
C59 C60 Fe51 71.12(10) . . ?
C61 C60 H60 125.8 . . ?
C59 C60 H60 125.8 . . ?
Fe51 C60 H60 125 . . ?
C60 C61 C62 107.86(17) . . ?
C60 C61 Fe51 71.67(10) . . ?
C62 C61 Fe51 69.97(10) . . ?
C60 C61 H61 126.1 . . ?
C62 C61 H61 126.1 . . ?
Fe51 C61 H61 123.9 . . ?
C58 C62 C61 107.60(16) . . ?
C58 C62 Fe51 71.62(10) . . ?
C61 C62 Fe51 70.27(10) . . ?
C58 C62 H62 126.2 . . ?
C61 C62 H62 126.2 . . ?
Fe51 C62 H62 123.6 . . ?
C64 C63 C67 107.79(16) . . ?
C64 C63 Fe52 68.99(10) . . ?
C67 C63 Fe52 70.70(10) . . ?
C64 C63 H63 126.1 . . ?
C67 C63 H63 126.1 . . ?
Fe52 C63 H63 125.8 . . ?
C63 C64 C65 108.00(15) . . ?
C63 C64 Fe52 72.13(10) . . ?
C65 C64 Fe52 70.15(10) . . ?
C63 C64 H64 126 . . ?
C65 C64 H64 126 . . ?
Fe52 C64 H64 123.4 . . ?
C66 C65 C64 107.63(15) . . ?
C66 C65 Fe52 71.42(10) . . ?
C64 C65 Fe52 69.96(9) . . ?
C66 C65 H65 126.2 . . ?
C64 C65 H65 126.2 . . ?
Fe52 C65 H65 124.1 . . ?
C65 C66 C67 108.33(16) . . ?
C65 C66 Fe52 69.76(9) . . ?
C67 C66 Fe52 71.25(9) . . ?
C65 C66 H66 125.8 . . ?
C67 C66 H66 125.8 . . ?
Fe52 C66 H66 124.8 . . ?
C63 C67 C66 108.24(15) . . ?
C63 C67 Fe52 70.68(9) . . ?
C66 C67 Fe52 69.94(10) . . ?
C63 C67 H67 125.9 . . ?
C66 C67 H67 125.9 . . ?
Fe52 C67 H67 125.1 . . ?
C73 C68 C69 109.09(13) . . ?
C73 C68 P51 114.38(11) . . ?
C69 C68 P51 115.21(11) . . ?
C73 C68 H68 105.8 . . ?
C69 C68 H68 105.8 . . ?
P51 C68 H68 105.8 . . ?
C70 C69 C68 109.94(14) . . ?
C70 C69 H69A 109.7 . . ?
C68 C69 H69A 109.7 . . ?
C70 C69 H69B 109.7 . . ?
C68 C69 H69B 109.7 . . ?
H69A C69 H69B 108.2 . . ?
C71 C70 C69 111.27(15) . . ?
C71 C70 H70A 109.4 . . ?
C69 C70 H70A 109.4 . . ?
C71 C70 H70B 109.4 . . ?
C69 C70 H70B 109.4 . . ?
H70A C70 H70B 108 . . ?
C70 C71 C72 111.19(14) . . ?
C70 C71 H71A 109.4 . . ?
C72 C71 H71A 109.4 . . ?
C70 C71 H71B 109.4 . . ?
C72 C71 H71B 109.4 . . ?
H71A C71 H71B 108 . . ?
C71 C72 C73 111.36(14) . . ?
C71 C72 H72A 109.4 . . ?
C73 C72 H72A 109.4 . . ?
C71 C72 H72B 109.4 . . ?
C73 C72 H72B 109.4 . . ?
H72A C72 H72B 108 . . ?
C68 C73 C72 109.96(14) . . ?
C68 C73 H73A 109.7 . . ?
C72 C73 H73A 109.7 . . ?
C68 C73 H73B 109.7 . . ?
C72 C73 H73B 109.7 . . ?
H73A C73 H73B 108.2 . . ?
 
#===END
 
data_compound2g
 
_audit_creation_method                  'WinGX routine CIF_UPDATE'
_audit_conform_dict_name                cif_core.dic
_audit_conform_dict_version             2.3
_audit_conform_dict_location            ftp://ftp.iucr.org/pub/cif_core.dic
_publ_requested_category                FM
 
#----------------------------------------------------------------------------#
#                   CHEMICAL INFORMATION                                     #
#----------------------------------------------------------------------------#
 
_chemical_name_systematic
;
 ?
;
_chemical_formula_moiety                '2(C19 H21 Au Cl Fe2 O3 P), C H2 Cl2'
_chemical_formula_sum                   'C39 H44 Au2 Cl4 Fe4 O6 P2'
_chemical_formula_weight                1429.82
_chemical_compound_source               'synthesis as described'
 
#----------------------------------------------------------------------------#
#                   UNIT CELL INFORMATION                                    #
#----------------------------------------------------------------------------#
 
_symmetry_cell_setting                  tetragonal
_symmetry_space_group_name_H-M          'P 42/n'
_symmetry_space_group_name_Hall         '-P 4bc'
_symmetry_Int_Tables_number             86
loop_
    _symmetry_equiv_pos_as_xyz
'x, y, z'
'-x+1/2, -y+1/2, z'
'-y, x+1/2, z+1/2'
'y+1/2, -x, z+1/2'
'-x, -y, -z'
'x-1/2, y-1/2, -z'
'y, -x-1/2, -z-1/2'
'-y-1/2, x, -z-1/2'
 
_cell_length_a                          17.9569(2)
_cell_length_b                          17.9569(2)
_cell_length_c                          13.6231(2)
_cell_angle_alpha                       90
_cell_angle_beta                        90
_cell_angle_gamma                       90
_cell_volume                            4392.77(9)
_cell_formula_units_Z                   4
_cell_measurement_temperature           100(2)
_cell_measurement_reflns_used           4220
_cell_measurement_theta_min             0.407
_cell_measurement_theta_max             25.350
_cell_measurement_wavelength            0.71073
 
#----------------------------------------------------------------------------#
#                   CRYSTAL INFORMATION                                      #
#----------------------------------------------------------------------------#
 
_exptl_crystal_description              plate
_exptl_crystal_colour                   red
_exptl_crystal_size_max                 0.22
_exptl_crystal_size_mid                 0.1
_exptl_crystal_size_min                 0.07
_exptl_crystal_density_diffrn           2.162
_exptl_crystal_density_method           'not measured'
_exptl_crystal_F_000                    2744
_exptl_special_details
;
 ?
;
 
#----------------------------------------------------------------------------#
#                   ABSORPTION CORRECTION                                    #
#----------------------------------------------------------------------------#
 
_exptl_absorpt_coefficient_mu           8.301
_exptl_absorpt_correction_type          multi-scan
_exptl_absorpt_process_details
;
 R.H. Blessing, Acta Cryst. (1995), A51, 33-38
;
_exptl_absorpt_correction_T_min         0.31832
_exptl_absorpt_correction_T_max         0.55706
 
#----------------------------------------------------------------------------#
#                   DATA COLLECTION                                          #
#----------------------------------------------------------------------------#
 
_diffrn_ambient_temperature             100(2)
_diffrn_radiation_wavelength            0.71073
_diffrn_radiation_type                  MoK\a
_diffrn_radiation_source                'fine-focus sealed tube' 
_diffrn_radiation_monochromator         'horizontally mounted graphite crystal' 
_diffrn_measurement_device_type         'KappaCCD' 
_diffrn_measurement_device              '90 mm CCD camera on \k-goniostat'
_diffrn_measurement_method              'CCD' 
_diffrn_radiation_probe                 x-ray
_diffrn_reflns_av_R_equivalents         0.0325
_diffrn_reflns_av_unetI/netI            0.0193
_diffrn_reflns_number                   34685
_diffrn_reflns_limit_h_min              0
_diffrn_reflns_limit_h_max              21
_diffrn_reflns_limit_k_min              0
_diffrn_reflns_limit_k_max              21
_diffrn_reflns_limit_l_min              0
_diffrn_reflns_limit_l_max              16
_diffrn_reflns_theta_min                1.88
_diffrn_reflns_theta_max                25.24
_diffrn_reflns_theta_full               25.24
_diffrn_measured_fraction_theta_full
                                        0.999
_diffrn_measured_fraction_theta_max
                                        0.999
_reflns_number_total                    3977
_reflns_number_gt                       3486
_reflns_threshold_expression            >2sigma(I)
 
#----------------------------------------------------------------------------#
#                   COMPUTER PROGRAMS USED                                   #
#----------------------------------------------------------------------------#
 
_computing_data_collection        'Collect (Bruker AXS BV, 1997-2004)' 
_computing_cell_refinement        'HKL Scalepack (Otwinowski & Minor, 1997)' 
_computing_data_reduction         
;
 HKL Denzo and Scalepack (Otwinowski & Minor, 1997) 
;
_computing_structure_solution           'SHELXS-97 (Sheldrick, 1997)'
_computing_structure_refinement         'SHELXL-97 (Sheldrick, 1997)'
_computing_molecular_graphics           'Ortep-3 for Windows (Farrugia, 1997)'
_computing_publication_material
                                   'WinGX publication routines (Farrugia, 1999)'
 
#----------------------------------------------------------------------------#
#                   REFINEMENT INFORMATION                                   #
#----------------------------------------------------------------------------#
 
_refine_special_details
;
 Refinement of F^2^ against ALL reflections.  The weighted R-factor wR and
 goodness of fit S are based on F^2^, conventional R-factors R are based
 on F, with F set to zero for negative F^2^. The threshold expression of
 F^2^ > 2sigma(F^2^) is used only for calculating R-factors(gt) etc. and is
 not relevant to the choice of reflections for refinement.  R-factors based
 on F^2^ are statistically about twice as large as those based on F, and R-
 factors based on ALL data will be even larger.
;
_refine_ls_structure_factor_coef        Fsqd
_refine_ls_matrix_type                  full
_refine_ls_weighting_scheme             calc
_refine_ls_weighting_details
        'calc w=1/[\s^2^(Fo^2^)+(0.0176P)^2^+11.4744P] where P=(Fo^2^+2Fc^2^)/3'
_atom_sites_solution_primary            direct
_atom_sites_solution_secondary          difmap
_atom_sites_solution_hydrogens          geom
_refine_ls_hydrogen_treatment           constr
_refine_ls_extinction_method            none
_refine_ls_number_reflns                3977
_refine_ls_number_parameters            258
_refine_ls_number_restraints            0
_refine_ls_R_factor_all                 0.0267
_refine_ls_R_factor_gt                  0.0223
_refine_ls_wR_factor_ref                0.051
_refine_ls_wR_factor_gt                 0.0482
_refine_ls_goodness_of_fit_ref          1.144
_refine_ls_restrained_S_all             1.144
_refine_ls_shift/su_max                 0.003
_refine_ls_shift/su_mean                0
_refine_diff_density_max                1.208
_refine_diff_density_min                -1.111
_refine_diff_density_rms                0.111
 
#----------------------------------------------------------------------------#
#                   ATOMIC TYPES, COORDINATES AND THERMAL PARAMETERS         #
#----------------------------------------------------------------------------#
 
loop_
    _atom_type_symbol
    _atom_type_description
    _atom_type_scat_dispersion_real
    _atom_type_scat_dispersion_imag
    _atom_type_scat_source
C C 0.0033 0.0016 'International Tables Vol C Tables 4.2.6.8 and 6.1.1.4'
H H 0 0 'International Tables Vol C Tables 4.2.6.8 and 6.1.1.4'
Au Au -2.0133 8.8022 'International Tables Vol C Tables 4.2.6.8 and 6.1.1.4'
Cl Cl 0.1484 0.1585 'International Tables Vol C Tables 4.2.6.8 and 6.1.1.4'
Fe Fe 0.3463 0.8444 'International Tables Vol C Tables 4.2.6.8 and 6.1.1.4'
O O 0.0106 0.006 'International Tables Vol C Tables 4.2.6.8 and 6.1.1.4'
P P 0.1023 0.0942 'International Tables Vol C Tables 4.2.6.8 and 6.1.1.4'
 
loop_
    _atom_site_label
    _atom_site_type_symbol
    _atom_site_fract_x
    _atom_site_fract_y
    _atom_site_fract_z
    _atom_site_U_iso_or_equiv
    _atom_site_adp_type
    _atom_site_occupancy
    _atom_site_symmetry_multiplicity
    _atom_site_calc_flag
    _atom_site_refinement_flags
    _atom_site_disorder_assembly
    _atom_site_disorder_group
Fe1 Fe 0.33922(3) 0.95694(3) 0.66809(3) 0.01169(11) Uani 1 1 d . . .
Fe2 Fe 0.34740(3) 0.96023(3) 0.85955(4) 0.01179(11) Uani 1 1 d . . .
Au1 Au 0.407928(7) 0.763045(7) 0.767558(10) 0.01226(6) Uani 1 1 d . . .
P1 P 0.41476(5) 0.88870(5) 0.76091(6) 0.01190(19) Uani 1 1 d . . .
Cl1 Cl 0.40686(5) 0.63419(5) 0.77200(6) 0.01512(18) Uani 1 1 d . . .
O1 O 0.47147(16) 1.06059(16) 0.8948(2) 0.0259(6) Uani 1 1 d . . .
O2 O 0.45428(16) 1.06309(16) 0.6134(2) 0.0276(7) Uani 1 1 d . . .
O3 O 0.27346(16) 1.08614(15) 0.76432(19) 0.0220(6) Uani 1 1 d . . .
C1 C 0.4226(2) 1.0210(2) 0.8776(3) 0.0159(8) Uani 1 1 d . . .
C2 C 0.4102(2) 1.0203(2) 0.6372(3) 0.0172(8) Uani 1 1 d . . .
C3 C 0.3057(2) 1.0289(2) 0.7633(3) 0.0170(8) Uani 1 1 d . . .
C4 C 0.3313(2) 0.8734(2) 0.9624(3) 0.0208(9) Uani 1 1 d . . .
H4 H 0.3614 0.8315 0.9687 0.025 Uiso 1 1 calc R . .
C5 C 0.2676(2) 0.8794(2) 0.9018(3) 0.0188(8) Uani 1 1 d . . .
H5 H 0.2489 0.8424 0.8608 0.023 Uiso 1 1 calc R . .
C6 C 0.2373(2) 0.9515(2) 0.9146(3) 0.0189(8) Uani 1 1 d . . .
H6 H 0.1948 0.9699 0.8841 0.023 Uiso 1 1 calc R . .
C7 C 0.2829(2) 0.9907(2) 0.9817(3) 0.0214(9) Uani 1 1 d . . .
H7 H 0.2761 1.0396 1.0026 0.026 Uiso 1 1 calc R . .
C8 C 0.3412(2) 0.9413(2) 1.0114(3) 0.0217(9) Uani 1 1 d . . .
H8 H 0.3792 0.9523 1.0555 0.026 Uiso 1 1 calc R . .
C9 C 0.2571(2) 0.8744(2) 0.6433(3) 0.0182(8) Uani 1 1 d . . .
H9 H 0.2403 0.8408 0.6903 0.022 Uiso 1 1 calc R . .
C10 C 0.3174(2) 0.8632(2) 0.5775(3) 0.0188(8) Uani 1 1 d . . .
H10 H 0.3465 0.8205 0.573 0.023 Uiso 1 1 calc R . .
C11 C 0.3255(2) 0.9277(2) 0.5202(3) 0.0200(8) Uani 1 1 d . . .
H11 H 0.3613 0.9354 0.472 0.024 Uiso 1 1 calc R . .
C12 C 0.2690(2) 0.9796(2) 0.5492(3) 0.0204(8) Uani 1 1 d . . .
H12 H 0.2615 1.0269 0.5229 0.024 Uiso 1 1 calc R . .
C13 C 0.2271(2) 0.9463(2) 0.6243(3) 0.0177(8) Uani 1 1 d . . .
H13 H 0.1865 0.9677 0.6562 0.021 Uiso 1 1 calc R . .
C14 C 0.5144(2) 0.9095(2) 0.7394(2) 0.0129(7) Uani 1 1 d . . .
H14 H 0.5211 0.9637 0.7382 0.015 Uiso 1 1 calc R . .
C15 C 0.5644(2) 0.8765(2) 0.8201(3) 0.0154(8) Uani 1 1 d . . .
H15A H 0.5525 0.8998 0.8824 0.019 Uiso 1 1 calc R . .
H15B H 0.5547 0.8236 0.826 0.019 Uiso 1 1 calc R . .
C16 C 0.6469(2) 0.8889(2) 0.7968(3) 0.0171(8) Uani 1 1 d . . .
H16A H 0.6579 0.9417 0.7997 0.021 Uiso 1 1 calc R . .
H16B H 0.677 0.8641 0.846 0.021 Uiso 1 1 calc R . .
C17 C 0.6678(2) 0.8592(2) 0.6952(3) 0.0178(8) Uani 1 1 d . . .
H17A H 0.7193 0.8715 0.6812 0.021 Uiso 1 1 calc R . .
H17B H 0.6632 0.8053 0.6949 0.021 Uiso 1 1 calc R . .
C18 C 0.6181(2) 0.8919(2) 0.6156(3) 0.0175(8) Uani 1 1 d . . .
H18A H 0.6305 0.8696 0.5529 0.021 Uiso 1 1 calc R . .
H18B H 0.6268 0.9451 0.6108 0.021 Uiso 1 1 calc R . .
C19 C 0.5360(2) 0.8778(2) 0.6385(3) 0.0166(8) Uani 1 1 d . . .
H19A H 0.5265 0.8246 0.6376 0.02 Uiso 1 1 calc R . .
H19B H 0.5054 0.9007 0.5882 0.02 Uiso 1 1 calc R . .
C90 C 0.25 0.25 0.8859(4) 0.0309(15) Uani 1 2 d S . .
H90A H 0.2744 0.2862 0.8441 0.037 Uiso 0.5 1 calc PR . .
H90B H 0.2256 0.2138 0.8441 0.037 Uiso 0.5 1 calc PR . .
Cl2 Cl 0.31738(8) 0.20451(7) 0.95846(9) 0.0462(3) Uani 1 1 d . . .
 
loop_
    _atom_site_aniso_label
    _atom_site_aniso_U_11
    _atom_site_aniso_U_22
    _atom_site_aniso_U_33
    _atom_site_aniso_U_23
    _atom_site_aniso_U_13
    _atom_site_aniso_U_12
Fe1 0.0120(3) 0.0136(3) 0.0095(2) 0.0004(2) -0.00009(19) -0.0005(2)
Fe2 0.0117(3) 0.0143(3) 0.0094(2) -0.0001(2) 0.00007(19) 0.0004(2)
Au1 0.01199(8) 0.01222(8) 0.01258(8) 0.00058(5) 0.00036(5) -0.00048(5)
P1 0.0106(5) 0.0128(5) 0.0123(4) 0.0000(4) 0.0002(3) 0.0000(4)
Cl1 0.0161(4) 0.0131(4) 0.0161(4) -0.0001(3) -0.0005(3) -0.0019(3)
O1 0.0239(16) 0.0238(16) 0.0300(16) -0.0042(12) 0.0014(13) -0.0077(13)
O2 0.0261(16) 0.0293(16) 0.0273(15) 0.0093(13) -0.0046(13) -0.0086(14)
O3 0.0311(16) 0.0175(15) 0.0176(14) -0.0030(11) -0.0032(12) 0.0099(13)
C1 0.019(2) 0.0156(19) 0.0127(17) 0.0000(15) 0.0000(15) 0.0038(17)
C2 0.020(2) 0.019(2) 0.0127(18) 0.0047(15) -0.0046(15) 0.0040(17)
C3 0.018(2) 0.020(2) 0.0131(17) -0.0022(15) -0.0010(15) -0.0013(17)
C4 0.021(2) 0.025(2) 0.0164(19) 0.0113(16) 0.0084(16) 0.0041(17)
C5 0.021(2) 0.021(2) 0.0150(18) 0.0031(15) 0.0036(15) -0.0049(17)
C6 0.015(2) 0.025(2) 0.0162(19) 0.0047(16) 0.0045(15) 0.0007(16)
C7 0.025(2) 0.024(2) 0.0153(19) -0.0046(16) 0.0115(16) -0.0025(17)
C8 0.022(2) 0.033(2) 0.0098(18) 0.0014(16) 0.0008(15) -0.0057(18)
C9 0.020(2) 0.021(2) 0.0139(18) -0.0009(15) -0.0020(15) -0.0057(17)
C10 0.021(2) 0.020(2) 0.0158(18) -0.0048(16) -0.0042(16) 0.0010(16)
C11 0.021(2) 0.025(2) 0.0141(19) -0.0009(16) -0.0004(16) -0.0028(17)
C12 0.025(2) 0.022(2) 0.0136(18) 0.0030(16) -0.0091(16) -0.0019(17)
C13 0.0137(19) 0.023(2) 0.0164(18) -0.0019(16) -0.0070(15) 0.0005(16)
C14 0.0123(18) 0.0117(18) 0.0146(17) 0.0003(14) 0.0005(14) 0.0027(14)
C15 0.019(2) 0.0146(19) 0.0130(18) 0.0016(14) -0.0002(15) -0.0007(15)
C16 0.017(2) 0.019(2) 0.0160(18) 0.0000(15) -0.0037(15) -0.0009(15)
C17 0.0124(19) 0.020(2) 0.0214(19) 0.0021(16) 0.0016(15) -0.0005(15)
C18 0.018(2) 0.021(2) 0.0142(18) 0.0039(15) 0.0023(15) -0.0012(16)
C19 0.021(2) 0.018(2) 0.0100(17) -0.0016(15) -0.0002(15) 0.0013(16)
C90 0.050(4) 0.024(3) 0.019(3) 0 0 -0.002(3)
Cl2 0.0621(9) 0.0364(7) 0.0403(7) 0.0119(5) -0.0221(6) -0.0124(6)
 
 
#----------------------------------------------------------------------------#
#                   MOLECULAR GEOMETRY                                       #
#----------------------------------------------------------------------------#
 
_geom_special_details
;
 All esds (except the esd in the dihedral angle between two l.s. planes)
 are estimated using the full covariance matrix.  The cell esds are taken
 into account individually in the estimation of esds in distances, angles
 and torsion angles; correlations between esds in cell parameters are only
 used when they are defined by crystal symmetry.  An approximate (isotropic)
 treatment of cell esds is used for estimating esds involving l.s. planes.
;
loop_
    _geom_bond_atom_site_label_1
    _geom_bond_atom_site_label_2
    _geom_bond_distance
    _geom_bond_site_symmetry_2
    _geom_bond_publ_flag
Fe1 C2 1.759(4) . ?
Fe1 C3 1.928(4) . ?
Fe1 C12 2.093(4) . ?
Fe1 C11 2.096(4) . ?
Fe1 C13 2.109(4) . ?
Fe1 C9 2.118(4) . ?
Fe1 C10 2.124(4) . ?
Fe1 P1 2.2228(10) . ?
Fe1 Fe2 2.6131(7) . ?
Fe2 C1 1.754(4) . ?
Fe2 C3 1.950(4) . ?
Fe2 C8 2.099(4) . ?
Fe2 C7 2.100(4) . ?
Fe2 C4 2.116(4) . ?
Fe2 C5 2.120(4) . ?
Fe2 C6 2.120(4) . ?
Fe2 P1 2.2178(10) . ?
Au1 P1 2.2615(10) . ?
Au1 Cl1 2.3147(9) . ?
P1 C14 1.852(4) . ?
O1 C1 1.153(5) . ?
O2 C2 1.150(5) . ?
O3 C3 1.179(5) . ?
C4 C8 1.401(6) . ?
C4 C5 1.414(6) . ?
C4 H4 0.93 . ?
C5 C6 1.415(6) . ?
C5 H5 0.93 . ?
C6 C7 1.414(6) . ?
C6 H6 0.93 . ?
C7 C8 1.432(6) . ?
C7 H7 0.93 . ?
C8 H8 0.93 . ?
C9 C10 1.419(5) . ?
C9 C13 1.424(6) . ?
C9 H9 0.93 . ?
C10 C11 1.403(5) . ?
C10 H10 0.93 . ?
C11 C12 1.433(6) . ?
C11 H11 0.93 . ?
C12 C13 1.404(5) . ?
C12 H12 0.93 . ?
C13 H13 0.93 . ?
C14 C15 1.537(5) . ?
C14 C19 1.538(5) . ?
C14 H14 0.98 . ?
C15 C16 1.532(5) . ?
C15 H15A 0.97 . ?
C15 H15B 0.97 . ?
C16 C17 1.529(5) . ?
C16 H16A 0.97 . ?
C16 H16B 0.97 . ?
C17 C18 1.523(5) . ?
C17 H17A 0.97 . ?
C17 H17B 0.97 . ?
C18 C19 1.527(5) . ?
C18 H18A 0.97 . ?
C18 H18B 0.97 . ?
C19 H19A 0.97 . ?
C19 H19B 0.97 . ?
C90 Cl2 1.763(4) 2 ?
C90 Cl2 1.763(4) . ?
C90 H90A 0.97 . ?
C90 H90B 0.97 . ?
 
loop_
    _geom_angle_atom_site_label_1
    _geom_angle_atom_site_label_2
    _geom_angle_atom_site_label_3
    _geom_angle
    _geom_angle_site_symmetry_1
    _geom_angle_site_symmetry_3
    _geom_angle_publ_flag
C2 Fe1 C3 87.30(17) . . ?
C2 Fe1 C12 97.21(16) . . ?
C3 Fe1 C12 101.67(16) . . ?
C2 Fe1 C11 91.02(16) . . ?
C3 Fe1 C11 141.08(16) . . ?
C12 Fe1 C11 40.02(15) . . ?
C2 Fe1 C13 133.02(16) . . ?
C3 Fe1 C13 87.30(16) . . ?
C12 Fe1 C13 39.04(15) . . ?
C11 Fe1 C13 66.00(15) . . ?
C2 Fe1 C9 156.75(16) . . ?
C3 Fe1 C9 111.07(16) . . ?
C12 Fe1 C9 66.00(15) . . ?
C11 Fe1 C9 65.76(15) . . ?
C13 Fe1 C9 39.37(15) . . ?
C2 Fe1 C10 120.51(16) . . ?
C3 Fe1 C10 149.88(16) . . ?
C12 Fe1 C10 65.99(15) . . ?
C11 Fe1 C10 38.84(15) . . ?
C13 Fe1 C10 65.65(15) . . ?
C9 Fe1 C10 39.10(15) . . ?
C2 Fe1 P1 92.90(12) . . ?
C3 Fe1 P1 100.21(12) . . ?
C12 Fe1 P1 156.25(12) . . ?
C11 Fe1 P1 118.70(11) . . ?
C13 Fe1 P1 133.94(11) . . ?
C9 Fe1 P1 97.46(11) . . ?
C10 Fe1 P1 90.37(11) . . ?
C2 Fe1 Fe2 100.55(12) . . ?
C3 Fe1 Fe2 47.98(11) . . ?
C12 Fe1 Fe2 143.33(11) . . ?
C11 Fe1 Fe2 166.27(11) . . ?
C13 Fe1 Fe2 109.76(11) . . ?
C9 Fe1 Fe2 102.37(10) . . ?
C10 Fe1 Fe2 127.48(11) . . ?
P1 Fe1 Fe2 53.86(3) . . ?
C1 Fe2 C3 89.78(16) . . ?
C1 Fe2 C8 90.19(16) . . ?
C3 Fe2 C8 138.14(16) . . ?
C1 Fe2 C7 98.71(16) . . ?
C3 Fe2 C7 98.96(16) . . ?
C8 Fe2 C7 39.87(16) . . ?
C1 Fe2 C4 118.11(16) . . ?
C3 Fe2 C4 149.19(16) . . ?
C8 Fe2 C4 38.83(15) . . ?
C7 Fe2 C4 65.92(16) . . ?
C1 Fe2 C5 155.34(16) . . ?
C3 Fe2 C5 110.88(16) . . ?
C8 Fe2 C5 65.52(15) . . ?
C7 Fe2 C5 65.81(15) . . ?
C4 Fe2 C5 39.01(15) . . ?
C1 Fe2 C6 135.59(16) . . ?
C3 Fe2 C6 85.79(16) . . ?
C8 Fe2 C6 65.81(15) . . ?
C7 Fe2 C6 39.16(15) . . ?
C4 Fe2 C6 65.40(15) . . ?
C5 Fe2 C6 38.99(15) . . ?
C1 Fe2 P1 91.47(12) . . ?
C3 Fe2 P1 99.71(11) . . ?
C8 Fe2 P1 122.14(12) . . ?
C7 Fe2 P1 158.73(12) . . ?
C4 Fe2 P1 92.81(11) . . ?
C5 Fe2 P1 97.85(11) . . ?
C6 Fe2 P1 132.84(11) . . ?
C1 Fe2 Fe1 101.39(12) . . ?
C3 Fe2 Fe1 47.28(11) . . ?
C8 Fe2 Fe1 167.66(11) . . ?
C7 Fe2 Fe1 139.96(12) . . ?
C4 Fe2 Fe1 129.53(11) . . ?
C5 Fe2 Fe1 102.56(10) . . ?
C6 Fe2 Fe1 107.39(10) . . ?
P1 Fe2 Fe1 54.04(3) . . ?
P1 Au1 Cl1 177.25(3) . . ?
C14 P1 Fe2 120.41(12) . . ?
C14 P1 Fe1 112.86(12) . . ?
Fe2 P1 Fe1 72.10(3) . . ?
C14 P1 Au1 105.08(12) . . ?
Fe2 P1 Au1 121.60(4) . . ?
Fe1 P1 Au1 122.67(4) . . ?
O1 C1 Fe2 176.3(3) . . ?
O2 C2 Fe1 176.5(3) . . ?
O3 C3 Fe1 138.2(3) . . ?
O3 C3 Fe2 137.1(3) . . ?
Fe1 C3 Fe2 84.74(16) . . ?
C8 C4 C5 108.4(4) . . ?
C8 C4 Fe2 69.9(2) . . ?
C5 C4 Fe2 70.6(2) . . ?
C8 C4 H4 125.8 . . ?
C5 C4 H4 125.8 . . ?
Fe2 C4 H4 125.2 . . ?
C4 C5 C6 108.0(3) . . ?
C4 C5 Fe2 70.4(2) . . ?
C6 C5 Fe2 70.5(2) . . ?
C4 C5 H5 126 . . ?
C6 C5 H5 126 . . ?
Fe2 C5 H5 124.7 . . ?
C7 C6 C5 108.3(3) . . ?
C7 C6 Fe2 69.7(2) . . ?
C5 C6 Fe2 70.5(2) . . ?
C7 C6 H6 125.9 . . ?
C5 C6 H6 125.9 . . ?
Fe2 C6 H6 125.5 . . ?
C6 C7 C8 107.3(3) . . ?
C6 C7 Fe2 71.2(2) . . ?
C8 C7 Fe2 70.0(2) . . ?
C6 C7 H7 126.4 . . ?
C8 C7 H7 126.4 . . ?
Fe2 C7 H7 124.1 . . ?
C4 C8 C7 108.2(3) . . ?
C4 C8 Fe2 71.3(2) . . ?
C7 C8 Fe2 70.1(2) . . ?
C4 C8 H8 125.9 . . ?
C7 C8 H8 125.9 . . ?
Fe2 C8 H8 124.3 . . ?
C10 C9 C13 107.6(3) . . ?
C10 C9 Fe1 70.7(2) . . ?
C13 C9 Fe1 70.0(2) . . ?
C10 C9 H9 126.2 . . ?
C13 C9 H9 126.2 . . ?
Fe1 C9 H9 124.7 . . ?
C11 C10 C9 108.3(3) . . ?
C11 C10 Fe1 69.5(2) . . ?
C9 C10 Fe1 70.2(2) . . ?
C11 C10 H10 125.9 . . ?
C9 C10 H10 125.9 . . ?
Fe1 C10 H10 126 . . ?
C10 C11 C12 108.1(3) . . ?
C10 C11 Fe1 71.6(2) . . ?
C12 C11 Fe1 69.9(2) . . ?
C10 C11 H11 126 . . ?
C12 C11 H11 126 . . ?
Fe1 C11 H11 124.1 . . ?
C13 C12 C11 107.6(3) . . ?
C13 C12 Fe1 71.1(2) . . ?
C11 C12 Fe1 70.1(2) . . ?
C13 C12 H12 126.2 . . ?
C11 C12 H12 126.2 . . ?
Fe1 C12 H12 124.2 . . ?
C12 C13 C9 108.4(3) . . ?
C12 C13 Fe1 69.9(2) . . ?
C9 C13 Fe1 70.6(2) . . ?
C12 C13 H13 125.8 . . ?
C9 C13 H13 125.8 . . ?
Fe1 C13 H13 125.3 . . ?
C15 C14 C19 110.4(3) . . ?
C15 C14 P1 111.9(2) . . ?
C19 C14 P1 108.1(2) . . ?
C15 C14 H14 108.8 . . ?
C19 C14 H14 108.8 . . ?
P1 C14 H14 108.8 . . ?
C16 C15 C14 111.2(3) . . ?
C16 C15 H15A 109.4 . . ?
C14 C15 H15A 109.4 . . ?
C16 C15 H15B 109.4 . . ?
C14 C15 H15B 109.4 . . ?
H15A C15 H15B 108 . . ?
C17 C16 C15 111.9(3) . . ?
C17 C16 H16A 109.2 . . ?
C15 C16 H16A 109.2 . . ?
C17 C16 H16B 109.2 . . ?
C15 C16 H16B 109.2 . . ?
H16A C16 H16B 107.9 . . ?
C18 C17 C16 111.5(3) . . ?
C18 C17 H17A 109.3 . . ?
C16 C17 H17A 109.3 . . ?
C18 C17 H17B 109.3 . . ?
C16 C17 H17B 109.3 . . ?
H17A C17 H17B 108 . . ?
C17 C18 C19 110.9(3) . . ?
C17 C18 H18A 109.5 . . ?
C19 C18 H18A 109.5 . . ?
C17 C18 H18B 109.5 . . ?
C19 C18 H18B 109.5 . . ?
H18A C18 H18B 108.1 . . ?
C18 C19 C14 111.4(3) . . ?
C18 C19 H19A 109.4 . . ?
C14 C19 H19A 109.4 . . ?
C18 C19 H19B 109.4 . . ?
C14 C19 H19B 109.4 . . ?
H19A C19 H19B 108 . . ?
Cl2 C90 Cl2 111.8(3) 2 . ?
Cl2 C90 H90A 109.3 2 . ?
Cl2 C90 H90A 109.3 . . ?
Cl2 C90 H90B 109.3 2 . ?
Cl2 C90 H90B 109.3 . . ?
H90A C90 H90B 107.9 . . ?
 
#===END

data_compound3
 
_audit_creation_method         'WinGX routine CIF_UPDATE'
_audit_conform_dict_name        cif_core.dic
_audit_conform_dict_version     2.2
_audit_conform_dict_location    ftp://ftp.iucr.org/pub/cif_core.dic
_publ_requested_category        FM
 
#----------------------------------------------------------------------------#
#                   CHEMICAL INFORMATION                                     #
#----------------------------------------------------------------------------#
 
_chemical_name_systematic
;
 ?
;
_chemical_formula_moiety                'C41 H42 Fe5 O9 P2'
_chemical_formula_sum                   'C43 H46 Cl4 Fe5 O9 P2'
_chemical_formula_weight                1189.79
_chemical_compound_source               'synthesis as described'
 
#----------------------------------------------------------------------------#
#                   UNIT CELL INFORMATION                                    #
#----------------------------------------------------------------------------#
 
_symmetry_cell_setting                  triclinic
_symmetry_space_group_name_H-M          'P -1'
_symmetry_space_group_name_Hall         '-P 1'
_symmetry_Int_Tables_number             2
loop_
    _symmetry_equiv_pos_as_xyz
'x, y, z'
'-x, -y, -z'
 
_cell_length_a                          9.0577(17)
_cell_length_b                          11.669(2)
_cell_length_c                          22.175(4)
_cell_angle_alpha                       94.591(3)
_cell_angle_beta                        99.170(3)
_cell_angle_gamma                       95.294(3)
_cell_volume                            2293.2(7)
_cell_formula_units_Z                   2
_cell_measurement_temperature           100(2)
_cell_measurement_reflns_used           1399
_cell_measurement_theta_min             2.805
_cell_measurement_theta_max             26.31
_cell_measurement_wavelength            0.71073
 
#----------------------------------------------------------------------------#
#                   CRYSTAL INFORMATION                                      #
#----------------------------------------------------------------------------#
 
_exptl_crystal_description              plate
_exptl_crystal_colour                   brown
_exptl_crystal_size_max                 0.24
_exptl_crystal_size_mid                 0.13
_exptl_crystal_size_min                 0.07
_exptl_crystal_density_diffrn           1.723
_exptl_crystal_density_method           'not measured'
_exptl_crystal_F_000                    1208
_exptl_special_details
;
 ?
;
 
#----------------------------------------------------------------------------#
#                   ABSORPTION CORRECTION                                    #
#----------------------------------------------------------------------------#
 
_exptl_absorpt_coefficient_mu           1.901
_exptl_absorpt_correction_type          multi-scan
_exptl_absorpt_process_details		'BRUKER Sadabs'
_exptl_absorpt_correction_T_min         0.4087
_exptl_absorpt_correction_T_max         0.8037
 
#----------------------------------------------------------------------------#
#                   DATA COLLECTION                                          #
#----------------------------------------------------------------------------#
 
_diffrn_ambient_temperature             100(2)
_diffrn_radiation_wavelength            0.71073
_diffrn_radiation_source                'fine-focus sealed tube'
_diffrn_radiation_type                  MoK\a
_diffrn_radiation_monochromator         graphite
_diffrn_measurement_device_type         'Smart-CCD-1000 BRUKER'
_diffrn_measurement_method              'omega scans'
_diffrn_radiation_probe                 x-ray
_diffrn_reflns_av_R_equivalents         0.0569
_diffrn_reflns_av_unetI/netI            0.0738
_diffrn_reflns_number                   26016 
_diffrn_reflns_limit_h_min              -11
_diffrn_reflns_limit_h_max              11
_diffrn_reflns_limit_k_min              -14
_diffrn_reflns_limit_k_max              14
_diffrn_reflns_limit_l_min              0
_diffrn_reflns_limit_l_max              27
_diffrn_reflns_theta_min                0.93
_diffrn_reflns_theta_max                26.43
_diffrn_reflns_theta_full               26.43
_diffrn_measured_fraction_theta_full
                                        0.992
_diffrn_measured_fraction_theta_max
                                        0.992
_reflns_number_total                    9381
_reflns_number_gt                       6234
_reflns_threshold_expression            >2sigma(I)
 
#----------------------------------------------------------------------------#
#                   COMPUTER PROGRAMS USED                                   #
#----------------------------------------------------------------------------#
 
_computing_data_collection              'Brucker Smart'
_computing_cell_refinement              'Brucker Smart'
_computing_data_reduction               'Brucker Smart'
_computing_structure_solution           'DIRDIF (1999)'
_computing_structure_refinement         'SHELXL-97 (Sheldrick, 1997)'
_computing_molecular_graphics           'Ortep-3 for Windows (Farrugia, 1997)'
_computing_publication_material
                                   'WinGX publication routines (Farrugia, 1999)'
 
#----------------------------------------------------------------------------#
#                   REFINEMENT INFORMATION                                   #
#----------------------------------------------------------------------------#
 
_refine_special_details
;
 Refinement of F^2^ against ALL reflections.  The weighted R-factor wR and
 goodness of fit S are based on F^2^, conventional R-factors R are based
 on F, with F set to zero for negative F^2^. The threshold expression of
 F^2^ > 2sigma(F^2^) is used only for calculating R-factors(gt) etc. and is
 not relevant to the choice of reflections for refinement.  R-factors based
 on F^2^ are statistically about twice as large as those based on F, and R-
 factors based on ALL data will be even larger.
;
_refine_ls_structure_factor_coef        Fsqd
_refine_ls_matrix_type                  full
_refine_ls_weighting_scheme             calc
_refine_ls_weighting_details
         'calc w=1/[\s^2^(Fo^2^)+(0.0381P)^2^+0.0000P] where P=(Fo^2^+2Fc^2^)/3'
_atom_sites_solution_primary            direct
_atom_sites_solution_secondary          difmap
_atom_sites_solution_hydrogens          geom
_refine_ls_hydrogen_treatment           constr
_refine_ls_extinction_method            none
_refine_ls_number_reflns                9381
_refine_ls_number_parameters            568
_refine_ls_number_restraints            0
_refine_ls_R_factor_all                 0.0793
_refine_ls_R_factor_gt                  0.0429
_refine_ls_wR_factor_ref                0.0933
_refine_ls_wR_factor_gt                 0.0843
_refine_ls_goodness_of_fit_ref          1.011
_refine_ls_restrained_S_all             1.011
_refine_ls_shift/su_max                 0.001
_refine_ls_shift/su_mean                0
_refine_diff_density_max                0.676
_refine_diff_density_min                -0.566
_refine_diff_density_rms                0.12
 
#----------------------------------------------------------------------------#
#                   ATOMIC TYPES, COORDINATES AND THERMAL PARAMETERS         #
#----------------------------------------------------------------------------#
 
loop_
    _atom_type_symbol
    _atom_type_description
    _atom_type_scat_dispersion_real
    _atom_type_scat_dispersion_imag
    _atom_type_scat_source
C C 0.0033 0.0016 'International Tables Vol C Tables 4.2.6.8 and 6.1.1.4'
H H 0 0 'International Tables Vol C Tables 4.2.6.8 and 6.1.1.4'
Fe Fe 0.3463 0.8444 'International Tables Vol C Tables 4.2.6.8 and 6.1.1.4'
O O 0.0106 0.006 'International Tables Vol C Tables 4.2.6.8 and 6.1.1.4'
P P 0.1023 0.0942 'International Tables Vol C Tables 4.2.6.8 and 6.1.1.4'
Cl Cl 0.1484 0.1585 'International Tables Vol C Tables 4.2.6.8 and 6.1.1.4'
 
loop_
    _atom_site_label
    _atom_site_type_symbol
    _atom_site_fract_x
    _atom_site_fract_y
    _atom_site_fract_z
    _atom_site_U_iso_or_equiv
    _atom_site_adp_type
    _atom_site_occupancy
    _atom_site_symmetry_multiplicity
    _atom_site_calc_flag
    _atom_site_refinement_flags
    _atom_site_disorder_assembly
    _atom_site_disorder_group
Fe1 Fe 0.37408(6) 0.21814(5) 0.42008(2) 0.01058(13) Uani 1 1 d . . .
Fe2 Fe 0.10364(6) 0.11179(4) 0.38792(2) 0.01018(13) Uani 1 1 d . . .
Fe3 Fe 0.12365(6) 0.27342(4) 0.06797(2) 0.01087(13) Uani 1 1 d . . .
Fe4 Fe 0.39216(6) 0.38358(5) 0.10207(2) 0.01092(13) Uani 1 1 d . . .
Fe5 Fe 0.21051(6) 0.30231(5) 0.25190(2) 0.01018(13) Uani 1 1 d . . .
P1 P 0.19062(10) 0.27592(8) 0.35022(4) 0.0097(2) Uani 1 1 d . . .
P2 P 0.20810(11) 0.37629(8) 0.16031(4) 0.0100(2) Uani 1 1 d . . .
O1 O 0.3530(3) 0.3996(2) 0.51430(13) 0.0219(7) Uani 1 1 d . . .
O2 O -0.0697(3) 0.2233(2) 0.46972(13) 0.0193(6) Uani 1 1 d . . .
O3 O -0.0912(3) 0.4354(2) 0.03255(12) 0.0183(6) Uani 1 1 d . . .
O4 O 0.3670(3) 0.6194(2) 0.07289(13) 0.0211(7) Uani 1 1 d . . .
O5 O 0.2633(3) 0.0772(2) 0.50792(13) 0.0205(6) Uani 1 1 d . . .
O6 O 0.2869(3) 0.3368(2) -0.02901(12) 0.0160(6) Uani 1 1 d . . .
O7 O 0.4643(3) 0.4786(2) 0.29964(12) 0.0172(6) Uani 1 1 d . . .
O8 O 0.3283(3) 0.0834(2) 0.22113(12) 0.0215(7) Uani 1 1 d . . .
O9 O -0.1181(3) 0.2575(2) 0.21881(12) 0.0184(6) Uani 1 1 d . . .
C1 C 0.3542(4) 0.3289(4) 0.47515(19) 0.0166(9) Uani 1 1 d . . .
C2 C 0.0013(4) 0.1856(3) 0.43600(18) 0.0131(8) Uani 1 1 d . . .
C3 C 0.0021(4) 0.3773(3) 0.04781(17) 0.0129(8) Uani 1 1 d . . .
C4 C 0.3691(4) 0.5255(3) 0.08509(18) 0.0142(9) Uani 1 1 d . . .
C5 C 0.2517(4) 0.1163(3) 0.46005(18) 0.0116(8) Uani 1 1 d . . .
C6 C 0.2727(4) 0.3350(3) 0.02263(18) 0.0136(8) Uani 1 1 d . . .
C7 C 0.3581(4) 0.4132(3) 0.28140(17) 0.0134(8) Uani 1 1 d . . .
C8 C 0.2818(4) 0.1706(3) 0.23368(17) 0.0130(8) Uani 1 1 d . . .
C9 C 0.0106(4) 0.2834(3) 0.23366(17) 0.0149(9) Uani 1 1 d . . .
C10 C 0.5262(4) 0.0896(4) 0.42527(18) 0.0179(9) Uani 1 1 d . . .
H10 H 0.5057 0.0159 0.4372 0.021 Uiso 1 1 calc R . .
C11 C 0.5865(4) 0.1882(4) 0.46467(19) 0.0181(9) Uani 1 1 d . . .
H11 H 0.6129 0.1918 0.5071 0.022 Uiso 1 1 calc R . .
C12 C 0.6002(4) 0.2828(4) 0.4276(2) 0.0196(9) Uani 1 1 d . . .
H12 H 0.6367 0.3589 0.4416 0.024 Uiso 1 1 calc R . .
C13 C 0.5486(4) 0.2395(4) 0.36619(19) 0.0196(10) Uani 1 1 d . . .
H13 H 0.5458 0.2821 0.3324 0.024 Uiso 1 1 calc R . .
C14 C 0.5015(4) 0.1203(4) 0.36443(18) 0.0180(9) Uani 1 1 d . . .
H14 H 0.4614 0.0709 0.3295 0.022 Uiso 1 1 calc R . .
C15 C 0.0157(5) 0.0278(3) 0.29884(19) 0.0198(9) Uani 1 1 d . . .
H15 H 0.0062 0.0626 0.2623 0.024 Uiso 1 1 calc R . .
C16 C 0.1405(5) -0.0267(3) 0.32460(19) 0.0203(10) Uani 1 1 d . . .
H16 H 0.2283 -0.0331 0.3084 0.024 Uiso 1 1 calc R . .
C17 C 0.1079(5) -0.0697(3) 0.37954(19) 0.0201(9) Uani 1 1 d . . .
H17 H 0.1708 -0.1096 0.4057 0.024 Uiso 1 1 calc R . .
C18 C -0.0339(5) -0.0421(3) 0.3877(2) 0.0251(11) Uani 1 1 d . . .
H18 H -0.0827 -0.061 0.42 0.03 Uiso 1 1 calc R . .
C19 C -0.0916(5) 0.0201(3) 0.3381(2) 0.0227(10) Uani 1 1 d . . .
H19 H -0.1838 0.0502 0.3326 0.027 Uiso 1 1 calc R . .
C20 C 0.1486(5) 0.1149(3) 0.01855(19) 0.0212(10) Uani 1 1 d . . .
H20 H 0.2198 0.1045 -0.0068 0.025 Uiso 1 1 calc R . .
C21 C 0.1663(4) 0.0999(3) 0.08228(18) 0.0156(9) Uani 1 1 d . . .
H21 H 0.2521 0.0787 0.1059 0.019 Uiso 1 1 calc R . .
C22 C 0.0336(4) 0.1223(3) 0.10360(18) 0.0175(9) Uani 1 1 d . . .
H22 H 0.015 0.1177 0.1434 0.021 Uiso 1 1 calc R . .
C23 C -0.0670(5) 0.1533(3) 0.0535(2) 0.0213(10) Uani 1 1 d . . .
H23 H -0.1634 0.1737 0.0547 0.026 Uiso 1 1 calc R . .
C24 C 0.0049(5) 0.1480(3) 0.0011(2) 0.0246(10) Uani 1 1 d . . .
H24 H -0.0366 0.1638 -0.0381 0.03 Uiso 1 1 calc R . .
C25 C 0.5776(4) 0.3157(4) 0.06998(19) 0.0218(10) Uani 1 1 d . . .
H25 H 0.5813 0.2941 0.029 0.026 Uiso 1 1 calc R . .
C26 C 0.6214(4) 0.4258(4) 0.1008(2) 0.0204(10) Uani 1 1 d . . .
H26 H 0.6601 0.4903 0.0841 0.024 Uiso 1 1 calc R . .
C27 C 0.5963(4) 0.4217(4) 0.16215(19) 0.0219(10) Uani 1 1 d . . .
H27 H 0.614 0.4834 0.1925 0.026 Uiso 1 1 calc R . .
C28 C 0.5407(4) 0.3090(4) 0.16898(19) 0.0204(10) Uani 1 1 d . . .
H28 H 0.5168 0.2821 0.205 0.024 Uiso 1 1 calc R . .
C29 C 0.5268(4) 0.2428(4) 0.1121(2) 0.0253(11) Uani 1 1 d . . .
H29 H 0.4906 0.165 0.1038 0.03 Uiso 1 1 calc R . .
C30 C 0.1050(4) 0.4003(3) 0.38513(17) 0.0110(8) Uani 1 1 d . . .
H30 H 0.1053 0.3877 0.4283 0.013 Uiso 1 1 calc R . .
C31 C -0.0594(4) 0.4060(3) 0.35616(17) 0.0123(8) Uani 1 1 d . . .
H31A H -0.0644 0.4224 0.3137 0.015 Uiso 1 1 calc R . .
H31B H -0.1168 0.3318 0.3567 0.015 Uiso 1 1 calc R . .
C32 C -0.1281(4) 0.5002(3) 0.39139(18) 0.0156(9) Uani 1 1 d . . .
H32A H -0.2308 0.5043 0.3717 0.019 Uiso 1 1 calc R . .
H32B H -0.1301 0.4806 0.433 0.019 Uiso 1 1 calc R . .
C33 C -0.0375(4) 0.6173(3) 0.39321(19) 0.0178(9) Uani 1 1 d . . .
H33A H -0.0455 0.6412 0.352 0.021 Uiso 1 1 calc R . .
H33B H -0.0786 0.6744 0.4182 0.021 Uiso 1 1 calc R . .
C34 C 0.1266(4) 0.6122(3) 0.41946(18) 0.0155(9) Uani 1 1 d . . .
H34A H 0.1353 0.5973 0.4622 0.019 Uiso 1 1 calc R . .
H34B H 0.1826 0.6865 0.4177 0.019 Uiso 1 1 calc R . .
C35 C 0.1950(4) 0.5179(3) 0.38439(17) 0.0126(8) Uani 1 1 d . . .
H35A H 0.2987 0.5152 0.4033 0.015 Uiso 1 1 calc R . .
H35B H 0.1939 0.5357 0.3423 0.015 Uiso 1 1 calc R . .
C36 C 0.1369(4) 0.5228(3) 0.16334(17) 0.0111(8) Uani 1 1 d . . .
H36 H 0.1267 0.5457 0.1214 0.013 Uiso 1 1 calc R . .
C37 C 0.2465(4) 0.6174(3) 0.20357(17) 0.0120(8) Uani 1 1 d . . .
H37A H 0.3464 0.6145 0.1934 0.014 Uiso 1 1 calc R . .
H37B H 0.2512 0.6041 0.2464 0.014 Uiso 1 1 calc R . .
C38 C 0.1942(4) 0.7370(3) 0.19333(19) 0.0192(9) Uani 1 1 d . . .
H38A H 0.2631 0.7961 0.2194 0.023 Uiso 1 1 calc R . .
H38B H 0.1948 0.752 0.151 0.023 Uiso 1 1 calc R . .
C39 C 0.0357(4) 0.7422(3) 0.20811(19) 0.0206(10) Uani 1 1 d . . .
H39A H 0.0382 0.7372 0.2517 0.025 Uiso 1 1 calc R . .
H39B H 0.0012 0.8159 0.1983 0.025 Uiso 1 1 calc R . .
C40 C -0.0737(4) 0.6447(3) 0.17220(19) 0.0188(9) Uani 1 1 d . . .
H40A H -0.0865 0.6557 0.1289 0.023 Uiso 1 1 calc R . .
H40B H -0.1709 0.6468 0.1851 0.023 Uiso 1 1 calc R . .
C41 C -0.0178(4) 0.5264(3) 0.18200(18) 0.0126(8) Uani 1 1 d . . .
H41A H -0.0117 0.5125 0.2248 0.015 Uiso 1 1 calc R . .
H41B H -0.0882 0.4661 0.1576 0.015 Uiso 1 1 calc R . .
C42 C 0.3941(5) 0.2603(4) 0.64789(19) 0.0232(10) Uani 1 1 d . . .
H42A H 0.3977 0.3417 0.6414 0.028 Uiso 1 1 calc R . .
H42B H 0.3216 0.2178 0.6149 0.028 Uiso 1 1 calc R . .
C43 C 0.4324(5) 0.1388(4) 0.8743(2) 0.0383(13) Uani 1 1 d . . .
H43A H 0.3894 0.2084 0.8865 0.046 Uiso 1 1 calc R . .
H43B H 0.4992 0.1582 0.8457 0.046 Uiso 1 1 calc R . .
Cl1 Cl 0.57171(12) 0.21383(10) 0.64531(5) 0.0296(3) Uani 1 1 d . . .
Cl2 Cl 0.33384(13) 0.24047(12) 0.71788(6) 0.0426(3) Uani 1 1 d . . .
Cl3 Cl 0.53602(15) 0.09006(10) 0.93920(6) 0.0417(3) Uani 1 1 d . . .
Cl4 Cl 0.28916(16) 0.03494(14) 0.83815(8) 0.0673(5) Uani 1 1 d . . .
 
loop_
    _atom_site_aniso_label
    _atom_site_aniso_U_11
    _atom_site_aniso_U_22
    _atom_site_aniso_U_33
    _atom_site_aniso_U_23
    _atom_site_aniso_U_13
    _atom_site_aniso_U_12
Fe1 0.0085(3) 0.0117(3) 0.0115(3) 0.0017(2) 0.0010(2) 0.0018(2)
Fe2 0.0102(3) 0.0087(3) 0.0118(3) 0.0013(2) 0.0025(2) 0.0004(2)
Fe3 0.0114(3) 0.0091(3) 0.0111(3) -0.0005(2) 0.0010(2) -0.0014(2)
Fe4 0.0092(3) 0.0116(3) 0.0118(3) 0.0015(2) 0.0019(2) -0.0002(2)
Fe5 0.0102(3) 0.0105(3) 0.0096(3) 0.0015(2) 0.0012(2) 0.0001(2)
P1 0.0081(5) 0.0098(5) 0.0109(5) -0.0001(4) 0.0016(4) 0.0000(4)
P2 0.0095(5) 0.0095(5) 0.0107(5) 0.0011(4) 0.0015(4) 0.0005(4)
O1 0.0230(16) 0.0231(17) 0.0179(16) -0.0031(13) -0.0004(13) 0.0041(13)
O2 0.0153(15) 0.0214(16) 0.0229(16) -0.0008(13) 0.0085(13) 0.0035(12)
O3 0.0141(15) 0.0205(16) 0.0207(16) 0.0070(13) 0.0009(12) 0.0028(12)
O4 0.0228(16) 0.0155(16) 0.0263(17) 0.0045(13) 0.0075(13) 0.0007(13)
O5 0.0181(15) 0.0259(17) 0.0192(16) 0.0100(13) 0.0040(13) 0.0031(13)
O6 0.0197(15) 0.0188(15) 0.0094(15) 0.0013(12) 0.0037(12) 0.0004(12)
O7 0.0112(14) 0.0171(15) 0.0208(16) -0.0003(12) -0.0014(12) -0.0025(12)
O8 0.0275(17) 0.0189(16) 0.0192(16) 0.0011(13) 0.0038(13) 0.0085(13)
O9 0.0097(15) 0.0204(16) 0.0238(16) 0.0002(13) 0.0000(12) 0.0011(12)
C1 0.011(2) 0.022(2) 0.018(2) 0.0074(19) 0.0026(17) 0.0048(17)
C2 0.0078(19) 0.012(2) 0.018(2) 0.0037(17) -0.0005(17) -0.0069(16)
C3 0.011(2) 0.015(2) 0.012(2) 0.0024(16) 0.0020(16) -0.0033(16)
C4 0.0072(19) 0.017(2) 0.016(2) -0.0042(18) 0.0015(16) -0.0033(16)
C5 0.0097(19) 0.0088(19) 0.017(2) 0.0014(17) 0.0014(16) 0.0045(15)
C6 0.009(2) 0.013(2) 0.019(2) -0.0008(17) 0.0015(17) 0.0060(16)
C7 0.019(2) 0.012(2) 0.012(2) 0.0068(16) 0.0070(17) 0.0088(17)
C8 0.012(2) 0.019(2) 0.008(2) 0.0041(17) 0.0007(16) 0.0018(17)
C9 0.022(2) 0.015(2) 0.009(2) 0.0014(16) 0.0041(17) 0.0064(18)
C10 0.013(2) 0.020(2) 0.022(2) 0.0093(19) 0.0035(18) 0.0074(17)
C11 0.009(2) 0.028(2) 0.017(2) 0.0050(19) -0.0026(17) 0.0063(17)
C12 0.011(2) 0.016(2) 0.032(3) 0.0004(19) 0.0089(19) -0.0029(17)
C13 0.008(2) 0.030(3) 0.025(2) 0.014(2) 0.0083(18) 0.0083(18)
C14 0.008(2) 0.028(2) 0.019(2) -0.0018(19) 0.0040(17) 0.0077(17)
C15 0.029(2) 0.011(2) 0.014(2) -0.0041(17) -0.0037(19) -0.0061(18)
C16 0.021(2) 0.011(2) 0.029(2) -0.0085(18) 0.0101(19) -0.0012(17)
C17 0.034(3) 0.004(2) 0.021(2) 0.0011(17) 0.001(2) 0.0021(18)
C18 0.035(3) 0.015(2) 0.023(2) -0.0045(19) 0.012(2) -0.016(2)
C19 0.014(2) 0.017(2) 0.034(3) -0.010(2) 0.0007(19) -0.0033(17)
C20 0.032(3) 0.011(2) 0.021(2) -0.0063(18) 0.012(2) -0.0051(18)
C21 0.022(2) 0.0057(19) 0.018(2) -0.0024(16) 0.0013(18) -0.0003(16)
C22 0.026(2) 0.011(2) 0.015(2) -0.0002(17) 0.0076(18) -0.0060(17)
C23 0.015(2) 0.009(2) 0.037(3) -0.0039(19) 0.002(2) -0.0048(17)
C24 0.036(3) 0.014(2) 0.017(2) -0.0066(18) -0.005(2) -0.009(2)
C25 0.012(2) 0.036(3) 0.020(2) -0.001(2) 0.0034(18) 0.0127(19)
C26 0.0040(19) 0.025(2) 0.034(3) 0.009(2) 0.0048(18) 0.0034(17)
C27 0.010(2) 0.029(3) 0.023(2) -0.004(2) -0.0054(18) 0.0049(18)
C28 0.010(2) 0.038(3) 0.017(2) 0.015(2) 0.0023(17) 0.0085(19)
C29 0.009(2) 0.017(2) 0.047(3) 0.001(2) -0.003(2) 0.0044(17)
C30 0.0098(19) 0.014(2) 0.0105(19) -0.0006(16) 0.0049(16) 0.0015(15)
C31 0.0111(19) 0.0090(19) 0.017(2) 0.0027(16) 0.0012(16) 0.0012(15)
C32 0.016(2) 0.014(2) 0.016(2) 0.0009(17) 0.0001(17) 0.0047(17)
C33 0.022(2) 0.013(2) 0.018(2) -0.0017(17) -0.0002(18) 0.0049(17)
C34 0.020(2) 0.008(2) 0.019(2) 0.0012(16) 0.0050(18) -0.0004(16)
C35 0.0116(19) 0.014(2) 0.012(2) 0.0028(16) 0.0022(16) -0.0001(16)
C36 0.0121(19) 0.0103(19) 0.011(2) 0.0015(16) 0.0022(16) -0.0005(15)
C37 0.014(2) 0.0071(19) 0.013(2) -0.0017(16) 0.0001(16) -0.0028(15)
C38 0.020(2) 0.016(2) 0.019(2) -0.0025(18) -0.0040(18) 0.0002(17)
C39 0.029(2) 0.008(2) 0.024(2) -0.0016(18) 0.003(2) 0.0057(18)
C40 0.017(2) 0.020(2) 0.021(2) 0.0010(18) 0.0037(18) 0.0078(18)
C41 0.012(2) 0.011(2) 0.014(2) -0.0002(16) 0.0003(16) 0.0025(16)
C42 0.025(2) 0.022(2) 0.021(2) 0.0004(19) 0.0019(19) 0.0016(19)
C43 0.035(3) 0.039(3) 0.039(3) 0.007(2) 0.001(2) -0.002(2)
Cl1 0.0228(6) 0.0327(6) 0.0323(7) -0.0047(5) 0.0028(5) 0.0076(5)
Cl2 0.0311(7) 0.0655(9) 0.0295(7) 0.0008(6) 0.0097(6) -0.0093(6)
Cl3 0.0575(8) 0.0273(7) 0.0346(7) -0.0054(5) -0.0109(6) 0.0144(6)
Cl4 0.0467(9) 0.0686(11) 0.0725(11) 0.0295(9) -0.0239(8) -0.0288(8)
 
 
#----------------------------------------------------------------------------#
#                   MOLECULAR GEOMETRY                                       #
#----------------------------------------------------------------------------#
 
_geom_special_details
;
 All esds (except the esd in the dihedral angle between two l.s. planes)
 are estimated using the full covariance matrix.  The cell esds are taken
 into account individually in the estimation of esds in distances, angles
 and torsion angles; correlations between esds in cell parameters are only
 used when they are defined by crystal symmetry.  An approximate (isotropic)
 treatment of cell esds is used for estimating esds involving l.s. planes.
;
loop_
    _geom_bond_atom_site_label_1
    _geom_bond_atom_site_label_2
    _geom_bond_distance
    _geom_bond_site_symmetry_2
    _geom_bond_publ_flag
Fe1 C1 1.748(4) . ?
Fe1 C5 1.914(4) . ?
Fe1 C11 2.092(4) . ?
Fe1 C12 2.092(4) . ?
Fe1 C10 2.126(4) . ?
Fe1 C13 2.136(4) . ?
Fe1 C14 2.152(4) . ?
Fe1 P1 2.2735(11) . ?
Fe1 Fe2 2.6057(8) . ?
Fe2 C2 1.747(4) . ?
Fe2 C5 1.910(4) . ?
Fe2 C19 2.082(4) . ?
Fe2 C18 2.089(4) . ?
Fe2 C17 2.115(4) . ?
Fe2 C15 2.131(4) . ?
Fe2 C16 2.140(4) . ?
Fe2 P1 2.2749(11) . ?
Fe3 C3 1.749(4) . ?
Fe3 C6 1.929(4) . ?
Fe3 C23 2.087(4) . ?
Fe3 C24 2.087(4) . ?
Fe3 C20 2.123(4) . ?
Fe3 C21 2.135(4) . ?
Fe3 C22 2.136(4) . ?
Fe3 P2 2.2708(11) . ?
Fe3 Fe4 2.6116(8) . ?
Fe4 C4 1.751(4) . ?
Fe4 C6 1.927(4) . ?
Fe4 C27 2.088(4) . ?
Fe4 C26 2.095(4) . ?
Fe4 C25 2.120(4) . ?
Fe4 C28 2.135(4) . ?
Fe4 C29 2.139(4) . ?
Fe4 P2 2.2655(11) . ?
Fe5 C8 1.763(4) . ?
Fe5 C7 1.776(4) . ?
Fe5 C9 1.781(4) . ?
Fe5 P1 2.2591(12) . ?
Fe5 P2 2.2674(12) . ?
P1 C30 1.878(4) . ?
P2 C36 1.883(4) . ?
O1 C1 1.151(5) . ?
O2 C2 1.148(4) . ?
O3 C3 1.157(4) . ?
O4 C4 1.150(4) . ?
O5 C5 1.182(4) . ?
O6 C6 1.174(4) . ?
O7 C7 1.168(4) . ?
O8 C8 1.167(4) . ?
O9 C9 1.164(4) . ?
C10 C11 1.399(5) . ?
C10 C14 1.412(5) . ?
C10 H10 0.93 . ?
C11 C12 1.437(6) . ?
C11 H11 0.93 . ?
C12 C13 1.403(6) . ?
C12 H12 0.93 . ?
C13 C14 1.412(5) . ?
C13 H13 0.93 . ?
C14 H14 0.93 . ?
C15 C19 1.406(6) . ?
C15 C16 1.411(6) . ?
C15 H15 0.93 . ?
C16 C17 1.417(6) . ?
C16 H16 0.93 . ?
C17 C18 1.388(6) . ?
C17 H17 0.93 . ?
C18 C19 1.424(6) . ?
C18 H18 0.93 . ?
C19 H19 0.93 . ?
C20 C24 1.397(6) . ?
C20 C21 1.423(5) . ?
C20 H20 0.93 . ?
C21 C22 1.399(5) . ?
C21 H21 0.93 . ?
C22 C23 1.413(6) . ?
C22 H22 0.93 . ?
C23 C24 1.421(6) . ?
C23 H23 0.93 . ?
C24 H24 0.93 . ?
C25 C26 1.399(6) . ?
C25 C29 1.414(6) . ?
C25 H25 0.93 . ?
C26 C27 1.418(6) . ?
C26 H26 0.93 . ?
C27 C28 1.393(6) . ?
C27 H27 0.93 . ?
C28 C29 1.406(6) . ?
C28 H28 0.93 . ?
C29 H29 0.93 . ?
C30 C35 1.534(5) . ?
C30 C31 1.535(5) . ?
C30 H30 0.98 . ?
C31 C32 1.533(5) . ?
C31 H31A 0.97 . ?
C31 H31B 0.97 . ?
C32 C33 1.521(5) . ?
C32 H32A 0.97 . ?
C32 H32B 0.97 . ?
C33 C34 1.516(5) . ?
C33 H33A 0.97 . ?
C33 H33B 0.97 . ?
C34 C35 1.530(5) . ?
C34 H34A 0.97 . ?
C34 H34B 0.97 . ?
C35 H35A 0.97 . ?
C35 H35B 0.97 . ?
C36 C41 1.526(5) . ?
C36 C37 1.535(5) . ?
C36 H36 0.98 . ?
C37 C38 1.537(5) . ?
C37 H37A 0.97 . ?
C37 H37B 0.97 . ?
C38 C39 1.528(5) . ?
C38 H38A 0.97 . ?
C38 H38B 0.97 . ?
C39 C40 1.519(5) . ?
C39 H39A 0.97 . ?
C39 H39B 0.97 . ?
C40 C41 1.534(5) . ?
C40 H40A 0.97 . ?
C40 H40B 0.97 . ?
C41 H41A 0.97 . ?
C41 H41B 0.97 . ?
C42 Cl2 1.750(4) . ?
C42 Cl1 1.753(4) . ?
C42 H42A 0.97 . ?
C42 H42B 0.97 . ?
C43 Cl4 1.737(5) . ?
C43 Cl3 1.753(5) . ?
C43 H43A 0.97 . ?
C43 H43B 0.97 . ?
 
loop_
    _geom_angle_atom_site_label_1
    _geom_angle_atom_site_label_2
    _geom_angle_atom_site_label_3
    _geom_angle
    _geom_angle_site_symmetry_1
    _geom_angle_site_symmetry_3
    _geom_angle_publ_flag
C1 Fe1 C5 87.87(17) . . ?
C1 Fe1 C11 93.77(17) . . ?
C5 Fe1 C11 99.24(16) . . ?
C1 Fe1 C12 88.56(17) . . ?
C5 Fe1 C12 138.84(16) . . ?
C11 Fe1 C12 40.17(15) . . ?
C1 Fe1 C10 129.55(17) . . ?
C5 Fe1 C10 85.80(15) . . ?
C11 Fe1 C10 38.72(15) . . ?
C12 Fe1 C10 65.63(16) . . ?
C1 Fe1 C13 119.68(17) . . ?
C5 Fe1 C13 148.14(16) . . ?
C11 Fe1 C13 65.65(16) . . ?
C12 Fe1 C13 38.74(15) . . ?
C10 Fe1 C13 64.70(15) . . ?
C1 Fe1 C14 153.58(17) . . ?
C5 Fe1 C14 110.22(16) . . ?
C11 Fe1 C14 65.15(15) . . ?
C12 Fe1 C14 65.10(15) . . ?
C10 Fe1 C14 38.55(15) . . ?
C13 Fe1 C14 38.45(15) . . ?
C1 Fe1 P1 92.00(13) . . ?
C5 Fe1 P1 98.98(11) . . ?
C11 Fe1 P1 161.06(12) . . ?
C12 Fe1 P1 122.12(12) . . ?
C10 Fe1 P1 138.43(11) . . ?
C13 Fe1 P1 95.89(11) . . ?
C14 Fe1 P1 103.47(11) . . ?
C1 Fe1 Fe2 104.12(13) . . ?
C5 Fe1 Fe2 46.99(11) . . ?
C11 Fe1 Fe2 139.75(11) . . ?
C12 Fe1 Fe2 166.86(12) . . ?
C10 Fe1 Fe2 107.32(11) . . ?
C13 Fe1 Fe2 128.72(12) . . ?
C14 Fe1 Fe2 102.30(11) . . ?
P1 Fe1 Fe2 55.07(3) . . ?
C2 Fe2 C5 84.86(16) . . ?
C2 Fe2 C19 91.70(16) . . ?
C5 Fe2 C19 144.23(17) . . ?
C2 Fe2 C18 91.36(17) . . ?
C5 Fe2 C18 104.46(17) . . ?
C19 Fe2 C18 39.92(16) . . ?
C2 Fe2 C17 124.29(16) . . ?
C5 Fe2 C17 87.08(16) . . ?
C19 Fe2 C17 65.68(17) . . ?
C18 Fe2 C17 38.55(16) . . ?
C2 Fe2 C15 125.63(17) . . ?
C5 Fe2 C15 146.50(16) . . ?
C19 Fe2 C15 38.96(15) . . ?
C18 Fe2 C15 65.59(16) . . ?
C17 Fe2 C15 65.08(16) . . ?
C2 Fe2 C16 155.12(16) . . ?
C5 Fe2 C16 107.92(16) . . ?
C19 Fe2 C16 65.31(16) . . ?
C18 Fe2 C16 65.11(16) . . ?
C17 Fe2 C16 38.91(15) . . ?
C15 Fe2 C16 38.58(15) . . ?
C2 Fe2 P1 93.37(12) . . ?
C5 Fe2 P1 99.05(11) . . ?
C19 Fe2 P1 116.70(13) . . ?
C18 Fe2 P1 156.34(13) . . ?
C17 Fe2 P1 142.31(12) . . ?
C15 Fe2 P1 93.10(11) . . ?
C16 Fe2 P1 105.14(11) . . ?
C2 Fe2 Fe1 102.63(12) . . ?
C5 Fe2 Fe1 47.12(11) . . ?
C19 Fe2 Fe1 163.50(12) . . ?
C18 Fe2 Fe1 145.58(13) . . ?
C17 Fe2 Fe1 111.11(12) . . ?
C15 Fe2 Fe1 124.55(11) . . ?
C16 Fe2 Fe1 101.59(11) . . ?
P1 Fe2 Fe1 55.02(3) . . ?
C3 Fe3 C6 93.40(16) . . ?
C3 Fe3 C23 86.89(16) . . ?
C6 Fe3 C23 138.84(17) . . ?
C3 Fe3 C24 93.16(17) . . ?
C6 Fe3 C24 99.21(17) . . ?
C23 Fe3 C24 39.81(16) . . ?
C3 Fe3 C20 129.30(17) . . ?
C6 Fe3 C20 83.28(15) . . ?
C23 Fe3 C20 65.64(16) . . ?
C24 Fe3 C20 38.74(16) . . ?
C3 Fe3 C21 151.83(16) . . ?
C6 Fe3 C21 107.14(15) . . ?
C23 Fe3 C21 64.95(15) . . ?
C24 Fe3 C21 65.16(16) . . ?
C20 Fe3 C21 39.05(15) . . ?
C3 Fe3 C22 117.77(16) . . ?
C6 Fe3 C22 145.08(15) . . ?
C23 Fe3 C22 39.08(15) . . ?
C24 Fe3 C22 65.81(16) . . ?
C20 Fe3 C22 65.22(15) . . ?
C21 Fe3 C22 38.24(14) . . ?
C3 Fe3 P2 90.11(13) . . ?
C6 Fe3 P2 99.23(12) . . ?
C23 Fe3 P2 121.93(12) . . ?
C24 Fe3 P2 161.04(12) . . ?
C20 Fe3 P2 140.47(12) . . ?
C21 Fe3 P2 104.93(11) . . ?
C22 Fe3 P2 96.22(11) . . ?
C3 Fe3 Fe4 106.80(12) . . ?
C6 Fe3 Fe4 47.34(12) . . ?
C23 Fe3 Fe4 165.44(12) . . ?
C24 Fe3 Fe4 140.70(13) . . ?
C20 Fe3 Fe4 107.27(12) . . ?
C21 Fe3 Fe4 101.32(11) . . ?
C22 Fe3 Fe4 126.83(11) . . ?
P2 Fe3 Fe4 54.76(3) . . ?
C4 Fe4 C6 86.64(17) . . ?
C4 Fe4 C27 96.81(17) . . ?
C6 Fe4 C27 153.02(16) . . ?
C4 Fe4 C26 86.43(16) . . ?
C6 Fe4 C26 114.49(16) . . ?
C27 Fe4 C26 39.63(16) . . ?
C4 Fe4 C25 114.16(17) . . ?
C6 Fe4 C25 88.63(16) . . ?
C27 Fe4 C25 65.49(16) . . ?
C26 Fe4 C25 38.76(15) . . ?
C4 Fe4 C28 133.98(17) . . ?
C6 Fe4 C28 137.13(16) . . ?
C27 Fe4 C28 38.49(15) . . ?
C26 Fe4 C28 65.08(16) . . ?
C25 Fe4 C28 64.79(16) . . ?
C4 Fe4 C29 150.95(17) . . ?
C6 Fe4 C29 100.11(16) . . ?
C27 Fe4 C29 64.88(16) . . ?
C26 Fe4 C29 64.98(16) . . ?
C25 Fe4 C29 38.79(16) . . ?
C28 Fe4 C29 38.41(16) . . ?
C4 Fe4 P2 93.72(12) . . ?
C6 Fe4 P2 99.45(12) . . ?
C27 Fe4 P2 106.97(12) . . ?
C26 Fe4 P2 145.99(12) . . ?
C25 Fe4 P2 151.46(12) . . ?
C28 Fe4 P2 91.88(11) . . ?
C29 Fe4 P2 112.68(13) . . ?
C4 Fe4 Fe3 103.92(12) . . ?
C6 Fe4 Fe3 47.39(11) . . ?
C27 Fe4 Fe3 152.88(12) . . ?
C26 Fe4 Fe3 157.11(12) . . ?
C25 Fe4 Fe3 119.22(12) . . ?
C28 Fe4 Fe3 116.34(11) . . ?
C29 Fe4 Fe3 101.26(11) . . ?
P2 Fe4 Fe3 54.95(3) . . ?
C8 Fe5 C7 111.26(17) . . ?
C8 Fe5 C9 109.42(17) . . ?
C7 Fe5 C9 139.31(17) . . ?
C8 Fe5 P1 97.35(12) . . ?
C7 Fe5 P1 87.27(12) . . ?
C9 Fe5 P1 88.53(12) . . ?
C8 Fe5 P2 98.47(12) . . ?
C7 Fe5 P2 86.36(12) . . ?
C9 Fe5 P2 86.89(12) . . ?
P1 Fe5 P2 164.17(4) . . ?
C30 P1 Fe5 109.85(12) . . ?
C30 P1 Fe1 110.43(12) . . ?
Fe5 P1 Fe1 124.98(5) . . ?
C30 P1 Fe2 108.15(12) . . ?
Fe5 P1 Fe2 127.84(5) . . ?
Fe1 P1 Fe2 69.90(4) . . ?
C36 P2 Fe4 107.03(12) . . ?
C36 P2 Fe5 110.20(12) . . ?
Fe4 P2 Fe5 128.05(5) . . ?
C36 P2 Fe3 111.45(12) . . ?
Fe4 P2 Fe3 70.30(4) . . ?
Fe5 P2 Fe3 124.14(5) . . ?
O1 C1 Fe1 173.9(4) . . ?
O2 C2 Fe2 172.9(3) . . ?
O3 C3 Fe3 172.0(3) . . ?
O4 C4 Fe4 173.9(3) . . ?
O5 C5 Fe2 137.7(3) . . ?
O5 C5 Fe1 136.4(3) . . ?
Fe2 C5 Fe1 85.89(16) . . ?
O6 C6 Fe4 137.3(3) . . ?
O6 C6 Fe3 137.3(3) . . ?
Fe4 C6 Fe3 85.27(16) . . ?
O7 C7 Fe5 173.6(3) . . ?
O8 C8 Fe5 179.4(4) . . ?
O9 C9 Fe5 171.6(3) . . ?
C11 C10 C14 108.8(4) . . ?
C11 C10 Fe1 69.3(2) . . ?
C14 C10 Fe1 71.7(2) . . ?
C11 C10 H10 125.6 . . ?
C14 C10 H10 125.6 . . ?
Fe1 C10 H10 125 . . ?
C10 C11 C12 107.5(4) . . ?
C10 C11 Fe1 72.0(2) . . ?
C12 C11 Fe1 69.9(2) . . ?
C10 C11 H11 126.3 . . ?
C12 C11 H11 126.3 . . ?
Fe1 C11 H11 123.5 . . ?
C13 C12 C11 107.6(4) . . ?
C13 C12 Fe1 72.3(2) . . ?
C11 C12 Fe1 69.9(2) . . ?
C13 C12 H12 126.2 . . ?
C11 C12 H12 126.2 . . ?
Fe1 C12 H12 123.2 . . ?
C12 C13 C14 108.4(4) . . ?
C12 C13 Fe1 68.9(2) . . ?
C14 C13 Fe1 71.4(2) . . ?
C12 C13 H13 125.8 . . ?
C14 C13 H13 125.8 . . ?
Fe1 C13 H13 125.5 . . ?
C13 C14 C10 107.7(4) . . ?
C13 C14 Fe1 70.2(2) . . ?
C10 C14 Fe1 69.7(2) . . ?
C13 C14 H14 126.1 . . ?
C10 C14 H14 126.1 . . ?
Fe1 C14 H14 125.5 . . ?
C19 C15 C16 108.0(4) . . ?
C19 C15 Fe2 68.6(2) . . ?
C16 C15 Fe2 71.0(2) . . ?
C19 C15 H15 126 . . ?
C16 C15 H15 126 . . ?
Fe2 C15 H15 125.9 . . ?
C15 C16 C17 107.7(4) . . ?
C15 C16 Fe2 70.4(2) . . ?
C17 C16 Fe2 69.6(2) . . ?
C15 C16 H16 126.1 . . ?
C17 C16 H16 126.1 . . ?
Fe2 C16 H16 125.5 . . ?
C18 C17 C16 108.4(4) . . ?
C18 C17 Fe2 69.7(2) . . ?
C16 C17 Fe2 71.5(2) . . ?
C18 C17 H17 125.8 . . ?
C16 C17 H17 125.8 . . ?
Fe2 C17 H17 124.6 . . ?
C17 C18 C19 108.1(4) . . ?
C17 C18 Fe2 71.8(2) . . ?
C19 C18 Fe2 69.8(2) . . ?
C17 C18 H18 126 . . ?
C19 C18 H18 126 . . ?
Fe2 C18 H18 124.1 . . ?
C15 C19 C18 107.8(4) . . ?
C15 C19 Fe2 72.4(2) . . ?
C18 C19 Fe2 70.3(2) . . ?
C15 C19 H19 126.1 . . ?
C18 C19 H19 126.1 . . ?
Fe2 C19 H19 122.8 . . ?
C24 C20 C21 107.5(4) . . ?
C24 C20 Fe3 69.2(2) . . ?
C21 C20 Fe3 70.9(2) . . ?
C24 C20 H20 126.3 . . ?
C21 C20 H20 126.3 . . ?
Fe3 C20 H20 125.2 . . ?
C22 C21 C20 108.8(4) . . ?
C22 C21 Fe3 70.9(2) . . ?
C20 C21 Fe3 70.0(2) . . ?
C22 C21 H21 125.6 . . ?
C20 C21 H21 125.6 . . ?
Fe3 C21 H21 125.1 . . ?
C21 C22 C23 107.4(4) . . ?
C21 C22 Fe3 70.8(2) . . ?
C23 C22 Fe3 68.6(2) . . ?
C21 C22 H22 126.3 . . ?
C23 C22 H22 126.3 . . ?
Fe3 C22 H22 125.9 . . ?
C22 C23 C24 108.1(4) . . ?
C22 C23 Fe3 72.3(2) . . ?
C24 C23 Fe3 70.1(2) . . ?
C22 C23 H23 126 . . ?
C24 C23 H23 126 . . ?
Fe3 C23 H23 123.2 . . ?
C20 C24 C23 108.2(4) . . ?
C20 C24 Fe3 72.0(2) . . ?
C23 C24 Fe3 70.1(2) . . ?
C20 C24 H24 125.9 . . ?
C23 C24 H24 125.9 . . ?
Fe3 C24 H24 123.6 . . ?
C26 C25 C29 107.9(4) . . ?
C26 C25 Fe4 69.7(2) . . ?
C29 C25 Fe4 71.4(2) . . ?
C26 C25 H25 126 . . ?
C29 C25 H25 126 . . ?
Fe4 C25 H25 124.6 . . ?
C25 C26 C27 107.8(4) . . ?
C25 C26 Fe4 71.6(2) . . ?
C27 C26 Fe4 69.9(2) . . ?
C25 C26 H26 126.1 . . ?
C27 C26 H26 126.1 . . ?
Fe4 C26 H26 124 . . ?
C28 C27 C26 108.1(4) . . ?
C28 C27 Fe4 72.5(2) . . ?
C26 C27 Fe4 70.4(2) . . ?
C28 C27 H27 126 . . ?
C26 C27 H27 126 . . ?
Fe4 C27 H27 122.7 . . ?
C27 C28 C29 108.3(4) . . ?
C27 C28 Fe4 69.0(2) . . ?
C29 C28 Fe4 71.0(2) . . ?
C27 C28 H28 125.9 . . ?
C29 C28 H28 125.9 . . ?
Fe4 C28 H28 125.8 . . ?
C28 C29 C25 107.8(4) . . ?
C28 C29 Fe4 70.6(2) . . ?
C25 C29 Fe4 69.9(2) . . ?
C28 C29 H29 126.1 . . ?
C25 C29 H29 126.1 . . ?
Fe4 C29 H29 125 . . ?
C35 C30 C31 109.3(3) . . ?
C35 C30 P1 113.6(2) . . ?
C31 C30 P1 113.2(2) . . ?
C35 C30 H30 106.8 . . ?
C31 C30 H30 106.8 . . ?
P1 C30 H30 106.8 . . ?
C32 C31 C30 110.6(3) . . ?
C32 C31 H31A 109.5 . . ?
C30 C31 H31A 109.5 . . ?
C32 C31 H31B 109.5 . . ?
C30 C31 H31B 109.5 . . ?
H31A C31 H31B 108.1 . . ?
C33 C32 C31 110.9(3) . . ?
C33 C32 H32A 109.5 . . ?
C31 C32 H32A 109.5 . . ?
C33 C32 H32B 109.5 . . ?
C31 C32 H32B 109.5 . . ?
H32A C32 H32B 108 . . ?
C34 C33 C32 111.1(3) . . ?
C34 C33 H33A 109.4 . . ?
C32 C33 H33A 109.4 . . ?
C34 C33 H33B 109.4 . . ?
C32 C33 H33B 109.4 . . ?
H33A C33 H33B 108 . . ?
C33 C34 C35 111.8(3) . . ?
C33 C34 H34A 109.3 . . ?
C35 C34 H34A 109.3 . . ?
C33 C34 H34B 109.3 . . ?
C35 C34 H34B 109.3 . . ?
H34A C34 H34B 107.9 . . ?
C34 C35 C30 110.0(3) . . ?
C34 C35 H35A 109.7 . . ?
C30 C35 H35A 109.7 . . ?
C34 C35 H35B 109.7 . . ?
C30 C35 H35B 109.7 . . ?
H35A C35 H35B 108.2 . . ?
C41 C36 C37 108.5(3) . . ?
C41 C36 P2 115.3(2) . . ?
C37 C36 P2 113.8(2) . . ?
C41 C36 H36 106.2 . . ?
C37 C36 H36 106.2 . . ?
P2 C36 H36 106.2 . . ?
C36 C37 C38 110.1(3) . . ?
C36 C37 H37A 109.6 . . ?
C38 C37 H37A 109.6 . . ?
C36 C37 H37B 109.6 . . ?
C38 C37 H37B 109.6 . . ?
H37A C37 H37B 108.2 . . ?
C39 C38 C37 110.3(3) . . ?
C39 C38 H38A 109.6 . . ?
C37 C38 H38A 109.6 . . ?
C39 C38 H38B 109.6 . . ?
C37 C38 H38B 109.6 . . ?
H38A C38 H38B 108.1 . . ?
C40 C39 C38 111.5(3) . . ?
C40 C39 H39A 109.3 . . ?
C38 C39 H39A 109.3 . . ?
C40 C39 H39B 109.3 . . ?
C38 C39 H39B 109.3 . . ?
H39A C39 H39B 108 . . ?
C39 C40 C41 111.5(3) . . ?
C39 C40 H40A 109.3 . . ?
C41 C40 H40A 109.3 . . ?
C39 C40 H40B 109.3 . . ?
C41 C40 H40B 109.3 . . ?
H40A C40 H40B 108 . . ?
C36 C41 C40 109.9(3) . . ?
C36 C41 H41A 109.7 . . ?
C40 C41 H41A 109.7 . . ?
C36 C41 H41B 109.7 . . ?
C40 C41 H41B 109.7 . . ?
H41A C41 H41B 108.2 . . ?
Cl2 C42 Cl1 112.4(2) . . ?
Cl2 C42 H42A 109.1 . . ?
Cl1 C42 H42A 109.1 . . ?
Cl2 C42 H42B 109.1 . . ?
Cl1 C42 H42B 109.1 . . ?
H42A C42 H42B 107.8 . . ?
Cl4 C43 Cl3 111.7(3) . . ?
Cl4 C43 H43A 109.3 . . ?
Cl3 C43 H43A 109.3 . . ?
Cl4 C43 H43B 109.3 . . ?
Cl3 C43 H43B 109.3 . . ?
H43A C43 H43B 107.9 . . ?
 
#===END
 
data_compound4
 
_audit_creation_method                  'WinGX routine CIF_UPDATE'
_audit_conform_dict_name                cif_core.dic
_audit_conform_dict_version             2.3
_audit_conform_dict_location            ftp://ftp.iucr.org/pub/cif_core.dic
_publ_requested_category                FM
 
#----------------------------------------------------------------------------#
#                   CHEMICAL INFORMATION                                     #
#----------------------------------------------------------------------------#
 
_chemical_name_systematic
;
 ?
;
_chemical_formula_moiety           'C41 H42 Co Fe4 O9 P2, C4 Co O4, C H2 Cl2'
_chemical_formula_sum
                                   'C46 H44 Cl2 Co2 Fe4 O13 P2'
_chemical_formula_weight                1278.91
_chemical_compound_source               'synthesis as described'
 
#----------------------------------------------------------------------------#
#                   UNIT CELL INFORMATION                                    #
#----------------------------------------------------------------------------#
 
_symmetry_cell_setting                  trigonal
_symmetry_space_group_name_H-M          'R -3'
_symmetry_space_group_name_Hall         '-R 3'
_symmetry_Int_Tables_number             148
loop_
    _symmetry_equiv_pos_as_xyz
'x, y, z'
'-y, x-y, z'
'-x+y, -x, z'
'x+2/3, y+1/3, z+1/3'
'-y+2/3, x-y+1/3, z+1/3'
'-x+y+2/3, -x+1/3, z+1/3'
'x+1/3, y+2/3, z+2/3'
'-y+1/3, x-y+2/3, z+2/3'
'-x+y+1/3, -x+2/3, z+2/3'
'-x, -y, -z'
'y, -x+y, -z'
'x-y, x, -z'
'-x+2/3, -y+1/3, -z+1/3'
'y+2/3, -x+y+1/3, -z+1/3'
'x-y+2/3, x+1/3, -z+1/3'
'-x+1/3, -y+2/3, -z+2/3'
'y+1/3, -x+y+2/3, -z+2/3'
'x-y+1/3, x+2/3, -z+2/3'
 
_cell_length_a                          37.8398(6)
_cell_length_b                          37.8398(6)
_cell_length_c                          19.7609(4)
_cell_angle_alpha                       90
_cell_angle_beta                        90
_cell_angle_gamma                       120
_cell_volume                            24503.9(7)
_cell_formula_units_Z                   18
_cell_measurement_temperature           100(2)
_cell_measurement_reflns_used           12843
_cell_measurement_theta_min             2.6047
_cell_measurement_theta_max             73.6737
_cell_measurement_wavelength            1.54184
 
#----------------------------------------------------------------------------#
#                   CRYSTAL INFORMATION                                      #
#----------------------------------------------------------------------------#
 
_exptl_crystal_description              neddle
_exptl_crystal_colour                   red
_exptl_crystal_size_max                 0.17
_exptl_crystal_size_mid                 0.05
_exptl_crystal_size_min                 0.04
_exptl_crystal_density_diffrn           1.56
_exptl_crystal_density_method           'not measured'
_exptl_crystal_F_000                    11628
_exptl_special_details
;
 ?
;
 
#----------------------------------------------------------------------------#
#                   ABSORPTION CORRECTION                                    #
#----------------------------------------------------------------------------#
 
_exptl_absorpt_coefficient_mu           14.923
_exptl_absorpt_correction_type          'multi-scan'
_exptl_absorpt_process_details
;
CrysAlis RED, Oxford Diffraction Ltd.,
Version 1.171.32.5 (release 08-05-2007 CrysAlis171 .NET)
(compiled May  8 2007,13:10:02)
Empirical absorption correction using spherical harmonics,
 implemented in SCALE3 ABSPACK scaling algorithm.
;
_exptl_absorpt_correction_T_min                   0.1447
_exptl_absorpt_correction_T_max                   0.55
 
#----------------------------------------------------------------------------#
#                   DATA COLLECTION                                          #
#----------------------------------------------------------------------------#
 
_diffrn_ambient_temperature             100(2)
_diffrn_radiation_wavelength            1.54184
_diffrn_radiation_source                'Nova (Cu) X-ray Source'
_diffrn_radiation_type                  CuK\a
_diffrn_radiation_monochromator         graphite
_diffrn_measurement_device_type         'ONYX CCD'
_diffrn_measurement_method              'CCD'
_diffrn_radiation_probe                 x-ray
_diffrn_reflns_av_R_equivalents         0.0927
_diffrn_reflns_av_unetI/netI            0.0675
_diffrn_reflns_number                   60488
_diffrn_reflns_limit_h_min              -45
_diffrn_reflns_limit_h_max              44
_diffrn_reflns_limit_k_min              -42
_diffrn_reflns_limit_k_max              37
_diffrn_reflns_limit_l_min              -24
_diffrn_reflns_limit_l_max              24
_diffrn_reflns_theta_min                2.61
_diffrn_reflns_theta_max                74.12
_diffrn_reflns_theta_full               70
_diffrn_measured_fraction_theta_full
                                        0.988
_diffrn_measured_fraction_theta_max
                                        0.949
_reflns_number_total                    10549
_reflns_number_gt                       7453
_reflns_threshold_expression            >2sigma(I)
 
# SQUEEZE RESULTS (APPEND TO CIF)
loop_
  _platon_squeeze_void_nr
  _platon_squeeze_void_average_x
  _platon_squeeze_void_average_y
  _platon_squeeze_void_average_z
  _platon_squeeze_void_volume
  _platon_squeeze_void_count_electrons
         1     0.000     0.000     0.000    1025.3     258.9
         2     0.000     0.000     0.500      23.1      -3.6
         3     0.333     0.667     0.667    1022.9     259.3
         4     0.333     0.667     0.167      24.1      -3.7
         5     0.667     0.333     0.333    1022.8     259.3
         6     0.667     0.333     0.833      24.1      -3.7
_platon_squeeze_details
;
;

#----------------------------------------------------------------------------#
#                   COMPUTER PROGRAMS USED                                   #
#----------------------------------------------------------------------------#
 
_computing_data_collection
;
CrysAlis CCD, Oxford Diffraction Ltd.,
Version 1.171.31.7 (release 18-10-2006 CrysAlis171 .NET)
(compiled Oct 18 2006,16:28:17)
;
_computing_cell_refinement
;
CrysAlis RED, Oxford Diffraction Ltd.,
Version 1.171.31.7 (release 18-10-2006 CrysAlis171 .NET)
(compiled Oct 18 2006,16:28:17)
;
_computing_data_reduction
;
CrysAlis RED, Oxford Diffraction Ltd.,
Version 1.171.31.7 (release 18-10-2006 CrysAlis171 .NET)
(compiled Oct 18 2006,16:28:17)
;
_computing_structure_solution           'SHELXS-97 (Sheldrick, 1997)'
_computing_structure_refinement         'SHELXL-97 (Sheldrick, 1997)'
_computing_molecular_graphics           'Ortep-3 for Windows (Farrugia, 1997)'
_computing_publication_material
                                   'WinGX publication routines (Farrugia, 1999)'
 
#----------------------------------------------------------------------------#
#                   REFINEMENT INFORMATION                                   #
#----------------------------------------------------------------------------#
 
_refine_special_details
;
 Refinement of F^2^ against ALL reflections.  The weighted R-factor wR and
 goodness of fit S are based on F^2^, conventional R-factors R are based
 on F, with F set to zero for negative F^2^. The threshold expression of
 F^2^ > 2sigma(F^2^) is used only for calculating R-factors(gt) etc. and is
 not relevant to the choice of reflections for refinement.  R-factors based
 on F^2^ are statistically about twice as large as those based on F, and R-
 factors based on ALL data will be even larger.
;
_refine_ls_structure_factor_coef        Fsqd
_refine_ls_matrix_type                  full
_refine_ls_weighting_scheme             calc
_refine_ls_weighting_details
         'calc w=1/[\s^2^(Fo^2^)+(0.0567P)^2^+0.0000P] where P=(Fo^2^+2Fc^2^)/3'
_atom_sites_solution_primary            direct
_atom_sites_solution_secondary          difmap
_atom_sites_solution_hydrogens          geom
_refine_ls_hydrogen_treatment           constr
_refine_ls_extinction_method            none
_refine_ls_number_reflns                10549
_refine_ls_number_parameters            622
_refine_ls_number_restraints            0
_refine_ls_R_factor_all                 0.0753
_refine_ls_R_factor_gt                  0.0473
_refine_ls_wR_factor_ref                0.1151
_refine_ls_wR_factor_gt                 0.1014
_refine_ls_goodness_of_fit_ref          1.016
_refine_ls_restrained_S_all             1.016
_refine_ls_shift/su_max                 0.001
_refine_ls_shift/su_mean                0
_refine_diff_density_max                0.495
_refine_diff_density_min                -0.457
_refine_diff_density_rms                0.092
 
#----------------------------------------------------------------------------#
#                   ATOMIC TYPES, COORDINATES AND THERMAL PARAMETERS         #
#----------------------------------------------------------------------------#
 
loop_
    _atom_type_symbol
    _atom_type_description
    _atom_type_scat_dispersion_real
    _atom_type_scat_dispersion_imag
    _atom_type_scat_source
C C 0.0181 0.0091 'International Tables Vol C Tables 4.2.6.8 and 6.1.1.4'
H H 0 0 'International Tables Vol C Tables 4.2.6.8 and 6.1.1.4'
Cl Cl 0.3639 0.7018 'International Tables Vol C Tables 4.2.6.8 and 6.1.1.4'
Co Co -2.3653 3.6143 'International Tables Vol C Tables 4.2.6.8 and 6.1.1.4'
Fe Fe -1.1336 3.1974 'International Tables Vol C Tables 4.2.6.8 and 6.1.1.4'
O O 0.0492 0.0322 'International Tables Vol C Tables 4.2.6.8 and 6.1.1.4'
P P 0.2955 0.4335 'International Tables Vol C Tables 4.2.6.8 and 6.1.1.4'
 
loop_
    _atom_site_label
    _atom_site_type_symbol
    _atom_site_fract_x
    _atom_site_fract_y
    _atom_site_fract_z
    _atom_site_U_iso_or_equiv
    _atom_site_adp_type
    _atom_site_occupancy
    _atom_site_symmetry_multiplicity
    _atom_site_calc_flag
    _atom_site_refinement_flags
    _atom_site_disorder_assembly
    _atom_site_disorder_group
Fe1 Fe 0.550820(19) 0.085717(19) 0.80725(3) 0.02201(15) Uani 1 1 d . . .
Fe2 Fe 0.589024(19) 0.083997(19) 0.69812(3) 0.02076(15) Uani 1 1 d . . .
Fe3 Fe 0.381511(19) 0.078700(19) 0.60098(3) 0.02255(15) Uani 1 1 d . . .
Fe4 Fe 0.41792(2) 0.077543(19) 0.48917(3) 0.02232(15) Uani 1 1 d . . .
P1 P 0.44943(3) 0.11281(3) 0.58360(5) 0.0203(2) Uani 1 1 d . . .
P2 P 0.55370(3) 0.11713(3) 0.70902(5) 0.0193(2) Uani 1 1 d . . .
O1 O 0.60621(10) 0.16284(10) 0.87271(16) 0.0348(8) Uani 1 1 d . . .
O2 O 0.66889(9) 0.15701(10) 0.70909(18) 0.0380(8) Uani 1 1 d . . .
O3 O 0.37576(10) 0.15218(10) 0.59096(17) 0.0368(8) Uani 1 1 d . . .
O4 O 0.43213(14) 0.15032(11) 0.41756(17) 0.0518(10) Uani 1 1 d . . .
O5 O 0.61551(10) 0.06627(10) 0.82560(16) 0.0338(7) Uani 1 1 d . . .
O6 O 0.33433(10) 0.06023(11) 0.47714(17) 0.0399(8) Uani 1 1 d . . .
O7 O 0.44907(10) 0.01694(9) 0.65872(16) 0.0337(7) Uani 1 1 d . . .
O8 O 0.54814(9) 0.12694(9) 0.52555(15) 0.0296(7) Uani 1 1 d . . .
O9 O 0.47395(9) 0.13669(9) 0.76375(16) 0.0297(7) Uani 1 1 d . . .
C1 C 0.58529(13) 0.13300(14) 0.8450(2) 0.0268(10) Uani 1 1 d . . .
C2 C 0.63654(14) 0.12929(14) 0.7053(2) 0.0292(10) Uani 1 1 d . . .
C3 C 0.37959(13) 0.12383(14) 0.5936(2) 0.0283(10) Uani 1 1 d . . .
C4 C 0.42690(16) 0.12233(15) 0.4480(2) 0.0331(11) Uani 1 1 d . . .
C5 C 0.59510(14) 0.07518(13) 0.7926(2) 0.0268(10) Uani 1 1 d . . .
C6 C 0.36397(14) 0.06812(13) 0.5074(2) 0.0300(10) Uani 1 1 d . . .
C7 C 0.46802(13) 0.05133(14) 0.6536(2) 0.0263(10) Uani 1 1 d . . .
C8 C 0.52909(13) 0.12119(13) 0.5737(2) 0.0253(9) Uani 1 1 d . . .
C9 C 0.48468(12) 0.12755(13) 0.7166(2) 0.0246(9) Uani 1 1 d . . .
C14 C 0.52963(14) 0.05576(15) 0.9001(2) 0.0346(11) Uani 1 1 d . . .
H14 H 0.5461 0.0608 0.9379 0.041 Uiso 1 1 calc R . .
C15 C 0.52149(14) 0.02647(14) 0.8503(2) 0.0321(11) Uani 1 1 d . . .
H15 H 0.5318 0.0087 0.8491 0.039 Uiso 1 1 calc R . .
C16 C 0.49514(14) 0.02845(14) 0.8023(2) 0.0336(11) Uani 1 1 d . . .
H16 H 0.4849 0.0122 0.7639 0.04 Uiso 1 1 calc R . .
C17 C 0.48706(13) 0.05934(14) 0.8226(2) 0.0336(11) Uani 1 1 d . . .
H17 H 0.4704 0.0671 0.8 0.04 Uiso 1 1 calc R . .
C18 C 0.50830(14) 0.07641(14) 0.8826(2) 0.0339(11) Uani 1 1 d . . .
H18 H 0.5084 0.0976 0.9068 0.041 Uiso 1 1 calc R . .
C19 C 0.55356(13) 0.04849(13) 0.6144(2) 0.0272(10) Uani 1 1 d . . .
H19 H 0.5317 0.0496 0.5951 0.033 Uiso 1 1 calc R . .
C20 C 0.59472(15) 0.07255(14) 0.5965(2) 0.0334(11) Uani 1 1 d . . .
H20 H 0.6051 0.0928 0.5634 0.04 Uiso 1 1 calc R . .
C21 C 0.61802(16) 0.06060(18) 0.6379(3) 0.0462(15) Uani 1 1 d . . .
H21 H 0.6462 0.0715 0.6367 0.055 Uiso 1 1 calc R . .
C22 C 0.59065(19) 0.02960(17) 0.6801(3) 0.0479(15) Uani 1 1 d . . .
H22 H 0.5974 0.0158 0.7119 0.057 Uiso 1 1 calc R . .
C23 C 0.55135(17) 0.02244(14) 0.6670(2) 0.0380(12) Uani 1 1 d . . .
H23 H 0.5277 0.0036 0.6893 0.046 Uiso 1 1 calc R . .
C24 C 0.35629(14) 0.06966(14) 0.6982(2) 0.0320(10) Uani 1 1 d . . .
H24 H 0.3594 0.0908 0.7261 0.038 Uiso 1 1 calc R . .
C25 C 0.32479(14) 0.04862(15) 0.6497(2) 0.0331(11) Uani 1 1 d . . .
H25 H 0.3035 0.0534 0.6404 0.04 Uiso 1 1 calc R . .
C26 C 0.33166(14) 0.01932(14) 0.6183(3) 0.0369(12) Uani 1 1 d . . .
H26 H 0.3156 0.0012 0.5846 0.044 Uiso 1 1 calc R . .
C27 C 0.36707(15) 0.02211(14) 0.6466(2) 0.0351(11) Uani 1 1 d . . .
H27 H 0.3786 0.0063 0.6345 0.042 Uiso 1 1 calc R . .
C28 C 0.38203(14) 0.05269(14) 0.6962(2) 0.0327(11) Uani 1 1 d . . .
H28 H 0.4049 0.0604 0.7231 0.039 Uiso 1 1 calc R . .
C29 C 0.40930(14) 0.01698(13) 0.4923(2) 0.0289(10) Uani 1 1 d . . .
H29 H 0.398 -0.0014 0.528 0.035 Uiso 1 1 calc R . .
C30 C 0.45062(14) 0.04544(14) 0.4837(2) 0.0294(10) Uani 1 1 d . . .
H30 H 0.4715 0.0492 0.5128 0.035 Uiso 1 1 calc R . .
C31 C 0.45551(15) 0.06745(15) 0.4242(2) 0.0353(11) Uani 1 1 d . . .
H31 H 0.4798 0.0884 0.4067 0.042 Uiso 1 1 calc R . .
C32 C 0.41537(17) 0.05118(16) 0.3953(2) 0.0373(12) Uani 1 1 d . . .
H32 H 0.4092 0.0596 0.3551 0.045 Uiso 1 1 calc R . .
C33 C 0.38772(15) 0.02093(14) 0.4375(2) 0.0341(11) Uani 1 1 d . . .
H33 H 0.3596 0.0058 0.431 0.041 Uiso 1 1 calc R . .
C34 C 0.58943(12) 0.17363(12) 0.7129(2) 0.0232(9) Uani 1 1 d . . .
H34 H 0.6123 0.1774 0.7413 0.028 Uiso 1 1 calc R . .
C35 C 0.57265(13) 0.19845(13) 0.7468(2) 0.0270(10) Uani 1 1 d . . .
H35A H 0.5515 0.1982 0.7187 0.032 Uiso 1 1 calc R . .
H35B H 0.5606 0.1863 0.7901 0.032 Uiso 1 1 calc R . .
C36 C 0.60678(14) 0.24232(15) 0.7574(3) 0.0398(12) Uani 1 1 d . . .
H36A H 0.5956 0.258 0.7777 0.048 Uiso 1 1 calc R . .
H36B H 0.6268 0.2427 0.7884 0.048 Uiso 1 1 calc R . .
C37 C 0.62743(15) 0.26196(14) 0.6907(3) 0.0439(13) Uani 1 1 d . . .
H37A H 0.6502 0.2891 0.6995 0.053 Uiso 1 1 calc R . .
H37B H 0.6082 0.2647 0.662 0.053 Uiso 1 1 calc R . .
C38 C 0.64296(14) 0.23683(14) 0.6539(3) 0.0382(12) Uani 1 1 d . . .
H38A H 0.6648 0.237 0.6798 0.046 Uiso 1 1 calc R . .
H38B H 0.6538 0.2489 0.61 0.046 Uiso 1 1 calc R . .
C39 C 0.60828(13) 0.19279(13) 0.6446(2) 0.0287(10) Uani 1 1 d . . .
H39A H 0.5875 0.1924 0.6155 0.034 Uiso 1 1 calc R . .
H39B H 0.6188 0.1769 0.6229 0.034 Uiso 1 1 calc R . .
C40 C 0.47009(13) 0.16885(13) 0.5702(2) 0.0251(9) Uani 1 1 d . . .
H40 H 0.4493 0.1711 0.5439 0.03 Uiso 1 1 calc R . .
C41 C 0.47623(14) 0.19358(12) 0.6344(2) 0.0270(10) Uani 1 1 d . . .
H41A H 0.4515 0.1806 0.6614 0.032 Uiso 1 1 calc R . .
H41B H 0.4982 0.1944 0.661 0.032 Uiso 1 1 calc R . .
C42 C 0.48655(16) 0.23692(14) 0.6170(3) 0.0369(12) Uani 1 1 d . . .
H42A H 0.4918 0.2526 0.6583 0.044 Uiso 1 1 calc R . .
H42B H 0.4635 0.2363 0.5944 0.044 Uiso 1 1 calc R . .
C43 C 0.52397(15) 0.25746(13) 0.5712(3) 0.0405(13) Uani 1 1 d . . .
H43A H 0.5287 0.2842 0.5581 0.049 Uiso 1 1 calc R . .
H43B H 0.5477 0.2612 0.5961 0.049 Uiso 1 1 calc R . .
C44 C 0.51885(17) 0.23268(14) 0.5087(3) 0.0427(13) Uani 1 1 d . . .
H44A H 0.5438 0.2457 0.4823 0.051 Uiso 1 1 calc R . .
H44B H 0.497 0.2314 0.4811 0.051 Uiso 1 1 calc R . .
C45 C 0.50886(14) 0.18945(13) 0.5279(2) 0.0309(10) Uani 1 1 d . . .
H45A H 0.5052 0.1736 0.4872 0.037 Uiso 1 1 calc R . .
H45B H 0.5313 0.1907 0.5534 0.037 Uiso 1 1 calc R . .
Co1 Co 0.497136(19) 0.105961(19) 0.64645(3) 0.01947(15) Uani 1 1 d . . .
Co2 Co 0.25505(2) 0.06102(2) 0.82212(4) 0.02867(17) Uani 1 1 d . . .
O10 O 0.16969(11) 0.00040(12) 0.8007(2) 0.0601(12) Uani 1 1 d . . .
O11 O 0.28915(13) 0.10537(12) 0.69644(18) 0.0513(10) Uani 1 1 d . . .
O12 O 0.30066(12) 0.02032(12) 0.8567(2) 0.0575(11) Uani 1 1 d . . .
O13 O 0.26383(13) 0.11803(14) 0.9289(2) 0.0621(12) Uani 1 1 d . . .
C10 C 0.20316(16) 0.02428(16) 0.8095(3) 0.0433(13) Uani 1 1 d . . .
C11 C 0.27485(16) 0.08779(15) 0.7459(3) 0.0375(12) Uani 1 1 d . . .
C12 C 0.28262(15) 0.03671(15) 0.8433(3) 0.0376(12) Uani 1 1 d . . .
C13 C 0.25971(15) 0.09546(17) 0.8870(3) 0.0396(12) Uani 1 1 d . . .
C99 C 0.42373(18) 0.9207(2) 0.6050(3) 0.0594(17) Uani 1 1 d . . .
H99A H 0.4293 0.9255 0.653 0.071 Uiso 1 1 calc R . .
H99B H 0.4215 0.8946 0.5943 0.071 Uiso 1 1 calc R . .
Cl1 Cl 0.46454(4) 0.95874(4) 0.56034(6) 0.0419(3) Uani 1 1 d . . .
Cl2 Cl 0.37737(3) 0.91781(4) 0.58758(6) 0.0422(3) Uani 1 1 d . . .
 
loop_
    _atom_site_aniso_label
    _atom_site_aniso_U_11
    _atom_site_aniso_U_22
    _atom_site_aniso_U_33
    _atom_site_aniso_U_23
    _atom_site_aniso_U_13
    _atom_site_aniso_U_12
Fe1 0.0210(3) 0.0210(3) 0.0245(3) 0.0018(3) -0.0006(3) 0.0109(3)
Fe2 0.0195(3) 0.0192(3) 0.0266(4) -0.0014(3) -0.0018(3) 0.0119(3)
Fe3 0.0172(3) 0.0203(3) 0.0316(4) -0.0054(3) -0.0030(3) 0.0104(3)
Fe4 0.0244(3) 0.0203(3) 0.0265(4) -0.0050(3) -0.0059(3) 0.0143(3)
P1 0.0192(5) 0.0176(5) 0.0260(6) -0.0022(4) -0.0027(4) 0.0107(4)
P2 0.0163(5) 0.0192(5) 0.0241(5) -0.0005(4) 0.0001(4) 0.0101(4)
O1 0.0352(18) 0.0320(19) 0.0337(18) -0.0063(15) -0.0122(15) 0.0142(16)
O2 0.0177(16) 0.0334(19) 0.057(2) -0.0031(16) -0.0044(15) 0.0082(15)
O3 0.0343(18) 0.0308(18) 0.054(2) -0.0094(15) -0.0070(16) 0.0227(16)
O4 0.091(3) 0.033(2) 0.034(2) -0.0036(16) -0.018(2) 0.033(2)
O5 0.0334(18) 0.0317(18) 0.0415(19) 0.0001(14) -0.0100(15) 0.0203(15)
O6 0.0291(18) 0.051(2) 0.049(2) -0.0217(17) -0.0208(16) 0.0265(17)
O7 0.0332(18) 0.0200(17) 0.044(2) -0.0010(14) 0.0003(15) 0.0102(14)
O8 0.0336(18) 0.0313(17) 0.0279(17) 0.0001(13) 0.0046(14) 0.0192(15)
O9 0.0240(16) 0.0300(17) 0.0366(18) -0.0018(14) 0.0061(13) 0.0147(14)
C1 0.025(2) 0.033(3) 0.025(2) 0.005(2) -0.0004(19) 0.017(2)
C2 0.030(3) 0.035(3) 0.035(3) -0.002(2) -0.002(2) 0.025(2)
C3 0.018(2) 0.033(3) 0.032(3) -0.008(2) -0.0008(18) 0.012(2)
C4 0.050(3) 0.030(3) 0.026(2) -0.009(2) -0.013(2) 0.025(2)
C5 0.030(2) 0.021(2) 0.031(2) -0.0036(18) -0.0058(19) 0.0136(19)
C6 0.032(3) 0.022(2) 0.037(3) -0.0081(19) -0.005(2) 0.015(2)
C7 0.022(2) 0.032(3) 0.031(2) -0.0026(19) 0.0009(18) 0.018(2)
C8 0.023(2) 0.024(2) 0.031(3) -0.0014(18) -0.0091(19) 0.0133(19)
C9 0.014(2) 0.020(2) 0.036(3) 0.0036(18) -0.0016(18) 0.0055(17)
C14 0.030(3) 0.041(3) 0.028(3) 0.012(2) 0.007(2) 0.015(2)
C15 0.029(2) 0.027(2) 0.040(3) 0.012(2) 0.006(2) 0.013(2)
C16 0.025(2) 0.026(2) 0.039(3) 0.006(2) 0.003(2) 0.004(2)
C17 0.018(2) 0.034(3) 0.046(3) 0.018(2) 0.006(2) 0.011(2)
C18 0.033(3) 0.028(2) 0.042(3) 0.007(2) 0.019(2) 0.017(2)
C19 0.021(2) 0.026(2) 0.035(3) -0.0103(19) -0.0071(19) 0.0115(19)
C20 0.038(3) 0.027(2) 0.028(2) -0.0072(19) 0.000(2) 0.011(2)
C21 0.030(3) 0.060(4) 0.057(3) -0.034(3) -0.010(3) 0.029(3)
C22 0.083(4) 0.041(3) 0.046(3) -0.022(3) -0.026(3) 0.051(3)
C23 0.049(3) 0.021(2) 0.039(3) -0.007(2) 0.004(2) 0.014(2)
C24 0.031(3) 0.029(2) 0.035(3) 0.001(2) 0.004(2) 0.014(2)
C25 0.019(2) 0.037(3) 0.044(3) -0.004(2) 0.002(2) 0.015(2)
C26 0.024(2) 0.024(2) 0.049(3) -0.003(2) 0.007(2) 0.002(2)
C27 0.037(3) 0.024(2) 0.044(3) 0.011(2) 0.014(2) 0.015(2)
C28 0.020(2) 0.036(3) 0.036(3) 0.010(2) 0.0027(19) 0.009(2)
C29 0.039(3) 0.017(2) 0.036(3) -0.0067(18) -0.002(2) 0.018(2)
C30 0.031(2) 0.028(2) 0.040(3) -0.011(2) -0.009(2) 0.023(2)
C31 0.036(3) 0.031(3) 0.043(3) -0.009(2) 0.006(2) 0.019(2)
C32 0.056(3) 0.043(3) 0.026(2) -0.012(2) -0.008(2) 0.035(3)
C33 0.037(3) 0.030(3) 0.044(3) -0.016(2) -0.010(2) 0.023(2)
C34 0.0143(19) 0.022(2) 0.032(2) -0.0044(18) -0.0044(17) 0.0084(17)
C35 0.021(2) 0.022(2) 0.041(3) -0.0045(19) -0.0017(19) 0.0126(19)
C36 0.024(2) 0.030(3) 0.063(4) -0.013(2) -0.004(2) 0.011(2)
C37 0.025(3) 0.022(2) 0.079(4) -0.003(2) -0.007(3) 0.008(2)
C38 0.027(2) 0.024(2) 0.056(3) 0.008(2) 0.003(2) 0.007(2)
C39 0.021(2) 0.023(2) 0.035(3) 0.0040(19) 0.0011(18) 0.0059(18)
C40 0.025(2) 0.022(2) 0.033(2) 0.0037(18) -0.0055(18) 0.0155(19)
C41 0.032(2) 0.019(2) 0.032(2) -0.0054(18) -0.0119(19) 0.0142(19)
C42 0.046(3) 0.025(2) 0.046(3) -0.009(2) -0.018(2) 0.023(2)
C43 0.033(3) 0.016(2) 0.070(4) 0.002(2) -0.016(3) 0.011(2)
C44 0.039(3) 0.026(3) 0.062(4) 0.012(2) 0.005(3) 0.015(2)
C45 0.025(2) 0.021(2) 0.044(3) 0.004(2) 0.003(2) 0.0100(19)
Co1 0.0170(3) 0.0171(3) 0.0253(4) -0.0009(3) -0.0012(3) 0.0093(3)
Co2 0.0275(4) 0.0246(4) 0.0363(4) -0.0050(3) -0.0073(3) 0.0148(3)
O10 0.032(2) 0.039(2) 0.108(4) -0.016(2) -0.023(2) 0.0164(19)
O11 0.082(3) 0.055(2) 0.037(2) 0.0075(19) 0.007(2) 0.050(2)
O12 0.043(2) 0.042(2) 0.096(3) 0.000(2) -0.023(2) 0.028(2)
O13 0.056(3) 0.070(3) 0.069(3) -0.040(2) -0.015(2) 0.038(2)
C10 0.038(3) 0.031(3) 0.068(4) -0.007(3) -0.014(3) 0.023(3)
C11 0.044(3) 0.037(3) 0.041(3) -0.009(2) -0.007(2) 0.027(2)
C12 0.032(3) 0.027(2) 0.045(3) -0.001(2) -0.004(2) 0.008(2)
C13 0.029(3) 0.045(3) 0.045(3) -0.007(3) -0.002(2) 0.019(2)
C99 0.044(3) 0.085(5) 0.057(4) 0.028(3) 0.017(3) 0.038(3)
Cl1 0.0284(6) 0.0452(7) 0.0492(7) -0.0123(6) 0.0020(5) 0.0162(5)
Cl2 0.0266(6) 0.0545(8) 0.0416(7) 0.0050(6) -0.0015(5) 0.0173(6)
 
 
#----------------------------------------------------------------------------#
#                   MOLECULAR GEOMETRY                                       #
#----------------------------------------------------------------------------#
 
_geom_special_details
;
 All esds (except the esd in the dihedral angle between two l.s. planes)
 are estimated using the full covariance matrix.  The cell esds are taken
 into account individually in the estimation of esds in distances, angles
 and torsion angles; correlations between esds in cell parameters are only
 used when they are defined by crystal symmetry.  An approximate (isotropic)
 treatment of cell esds is used for estimating esds involving l.s. planes.
;
loop_
    _geom_bond_atom_site_label_1
    _geom_bond_atom_site_label_2
    _geom_bond_distance
    _geom_bond_site_symmetry_2
    _geom_bond_publ_flag
Fe1 C1 1.768(5) . ?
Fe1 C5 1.928(4) . ?
Fe1 C18 2.089(4) . ?
Fe1 C14 2.094(4) . ?
Fe1 C15 2.120(4) . ?
Fe1 C17 2.122(4) . ?
Fe1 C16 2.140(4) . ?
Fe1 P2 2.2503(12) . ?
Fe1 Fe2 2.6151(9) . ?
Fe2 C2 1.763(5) . ?
Fe2 C5 1.930(4) . ?
Fe2 C20 2.089(5) . ?
Fe2 C21 2.092(5) . ?
Fe2 C22 2.120(5) . ?
Fe2 C23 2.125(5) . ?
Fe2 C19 2.130(4) . ?
Fe2 P2 2.2542(11) . ?
Fe3 C3 1.751(5) . ?
Fe3 C6 1.937(5) . ?
Fe3 C25 2.094(5) . ?
Fe3 C24 2.096(5) . ?
Fe3 C26 2.118(5) . ?
Fe3 C27 2.128(4) . ?
Fe3 C28 2.129(5) . ?
Fe3 P1 2.2519(12) . ?
Fe3 Fe4 2.6156(9) . ?
Fe4 C4 1.754(5) . ?
Fe4 C6 1.922(5) . ?
Fe4 C32 2.085(4) . ?
Fe4 C31 2.089(4) . ?
Fe4 C33 2.118(4) . ?
Fe4 C30 2.127(4) . ?
Fe4 C29 2.148(4) . ?
Fe4 P1 2.2569(12) . ?
P1 C40 1.876(4) . ?
P1 Co1 2.3102(12) . ?
P2 C34 1.875(4) . ?
P2 Co1 2.3202(12) . ?
O1 C1 1.143(5) . ?
O2 C2 1.149(6) . ?
O3 C3 1.153(5) . ?
O4 C4 1.145(6) . ?
O5 C5 1.181(5) . ?
O6 C6 1.171(5) . ?
O7 C7 1.134(5) . ?
O8 C8 1.146(5) . ?
O9 C9 1.138(5) . ?
C7 Co1 1.797(5) . ?
C8 Co1 1.779(5) . ?
C9 Co1 1.787(5) . ?
C14 C15 1.396(7) . ?
C14 C18 1.418(7) . ?
C14 H14 0.93 . ?
C15 C16 1.405(7) . ?
C15 H15 0.93 . ?
C16 C17 1.406(7) . ?
C16 H16 0.93 . ?
C17 C18 1.397(7) . ?
C17 H17 0.93 . ?
C18 H18 0.93 . ?
C19 C20 1.401(6) . ?
C19 C23 1.405(7) . ?
C19 H19 0.93 . ?
C20 C21 1.432(7) . ?
C20 H20 0.93 . ?
C21 C22 1.389(8) . ?
C21 H21 0.93 . ?
C22 C23 1.396(8) . ?
C22 H22 0.93 . ?
C23 H23 0.93 . ?
C24 C28 1.410(7) . ?
C24 C25 1.423(7) . ?
C24 H24 0.93 . ?
C25 C26 1.404(7) . ?
C25 H25 0.93 . ?
C26 C27 1.407(7) . ?
C26 H26 0.93 . ?
C27 C28 1.402(7) . ?
C27 H27 0.93 . ?
C28 H28 0.93 . ?
C29 C30 1.396(7) . ?
C29 C33 1.408(7) . ?
C29 H29 0.93 . ?
C30 C31 1.399(7) . ?
C30 H30 0.93 . ?
C31 C32 1.441(7) . ?
C31 H31 0.93 . ?
C32 C33 1.380(7) . ?
C32 H32 0.93 . ?
C33 H33 0.93 . ?
C34 C35 1.527(6) . ?
C34 C39 1.529(6) . ?
C34 H34 0.98 . ?
C35 C36 1.524(6) . ?
C35 H35A 0.97 . ?
C35 H35B 0.97 . ?
C36 C37 1.523(7) . ?
C36 H36A 0.97 . ?
C36 H36B 0.97 . ?
C37 C38 1.530(7) . ?
C37 H37A 0.97 . ?
C37 H37B 0.97 . ?
C38 C39 1.531(6) . ?
C38 H38A 0.97 . ?
C38 H38B 0.97 . ?
C39 H39A 0.97 . ?
C39 H39B 0.97 . ?
C40 C45 1.522(6) . ?
C40 C41 1.523(6) . ?
C40 H40 0.98 . ?
C41 C42 1.523(6) . ?
C41 H41A 0.97 . ?
C41 H41B 0.97 . ?
C42 C43 1.526(7) . ?
C42 H42A 0.97 . ?
C42 H42B 0.97 . ?
C43 C44 1.504(7) . ?
C43 H43A 0.97 . ?
C43 H43B 0.97 . ?
C44 C45 1.532(6) . ?
C44 H44A 0.97 . ?
C44 H44B 0.97 . ?
C45 H45A 0.97 . ?
C45 H45B 0.97 . ?
Co2 C12 1.752(5) . ?
Co2 C11 1.759(6) . ?
Co2 C10 1.767(5) . ?
Co2 C13 1.772(5) . ?
O10 C10 1.143(6) . ?
O11 C11 1.154(6) . ?
O12 C12 1.159(6) . ?
O13 C13 1.143(6) . ?
C99 Cl1 1.735(6) . ?
C99 Cl2 1.737(6) . ?
C99 H99A 0.97 . ?
C99 H99B 0.97 . ?
 
loop_
    _geom_angle_atom_site_label_1
    _geom_angle_atom_site_label_2
    _geom_angle_atom_site_label_3
    _geom_angle
    _geom_angle_site_symmetry_1
    _geom_angle_site_symmetry_3
    _geom_angle_publ_flag
C1 Fe1 C5 89.71(19) . . ?
C1 Fe1 C18 89.2(2) . . ?
C5 Fe1 C18 138.40(19) . . ?
C1 Fe1 C14 93.9(2) . . ?
C5 Fe1 C14 99.02(19) . . ?
C18 Fe1 C14 39.64(18) . . ?
C1 Fe1 C15 129.20(19) . . ?
C5 Fe1 C15 83.75(18) . . ?
C18 Fe1 C15 65.40(18) . . ?
C14 Fe1 C15 38.69(19) . . ?
C1 Fe1 C17 120.4(2) . . ?
C5 Fe1 C17 145.64(19) . . ?
C18 Fe1 C17 38.74(19) . . ?
C14 Fe1 C17 65.32(18) . . ?
C15 Fe1 C17 64.80(18) . . ?
C1 Fe1 C16 154.0(2) . . ?
C5 Fe1 C16 107.52(19) . . ?
C18 Fe1 C16 64.94(19) . . ?
C14 Fe1 C16 64.85(19) . . ?
C15 Fe1 C16 38.52(18) . . ?
C17 Fe1 C16 38.54(18) . . ?
C1 Fe1 P2 90.75(14) . . ?
C5 Fe1 P2 99.33(14) . . ?
C18 Fe1 P2 122.26(14) . . ?
C14 Fe1 P2 161.09(14) . . ?
C15 Fe1 P2 140.04(14) . . ?
C17 Fe1 P2 96.61(13) . . ?
C16 Fe1 P2 105.00(13) . . ?
C1 Fe1 Fe2 103.64(14) . . ?
C5 Fe1 Fe2 47.37(13) . . ?
C18 Fe1 Fe2 166.52(15) . . ?
C14 Fe1 Fe2 140.88(14) . . ?
C15 Fe1 Fe2 107.96(13) . . ?
C17 Fe1 Fe2 128.24(14) . . ?
C16 Fe1 Fe2 102.35(14) . . ?
P2 Fe1 Fe2 54.58(3) . . ?
C2 Fe2 C5 86.5(2) . . ?
C2 Fe2 C20 96.8(2) . . ?
C5 Fe2 C20 149.40(19) . . ?
C2 Fe2 C21 87.8(2) . . ?
C5 Fe2 C21 110.1(2) . . ?
C20 Fe2 C21 40.0(2) . . ?
C2 Fe2 C22 116.5(2) . . ?
C5 Fe2 C22 86.1(2) . . ?
C20 Fe2 C22 65.2(2) . . ?
C21 Fe2 C22 38.5(2) . . ?
C2 Fe2 C23 152.6(2) . . ?
C5 Fe2 C23 99.39(19) . . ?
C20 Fe2 C23 64.94(19) . . ?
C21 Fe2 C23 65.0(2) . . ?
C22 Fe2 C23 38.4(2) . . ?
C2 Fe2 C19 133.6(2) . . ?
C5 Fe2 C19 137.20(18) . . ?
C20 Fe2 C19 38.77(17) . . ?
C21 Fe2 C19 65.75(18) . . ?
C22 Fe2 C19 64.65(18) . . ?
C23 Fe2 C19 38.57(18) . . ?
C2 Fe2 P2 92.96(14) . . ?
C5 Fe2 P2 99.14(13) . . ?
C20 Fe2 P2 111.01(14) . . ?
C21 Fe2 P2 150.70(17) . . ?
C22 Fe2 P2 150.38(17) . . ?
C23 Fe2 P2 112.21(15) . . ?
C19 Fe2 P2 93.63(12) . . ?
C2 Fe2 Fe1 102.53(15) . . ?
C5 Fe2 Fe1 47.30(13) . . ?
C20 Fe2 Fe1 156.05(14) . . ?
C21 Fe2 Fe1 153.29(18) . . ?
C22 Fe2 Fe1 116.60(18) . . ?
C23 Fe2 Fe1 100.94(14) . . ?
C19 Fe2 Fe1 118.31(12) . . ?
P2 Fe2 Fe1 54.44(3) . . ?
C3 Fe3 C6 86.88(19) . . ?
C3 Fe3 C25 92.13(19) . . ?
C6 Fe3 C25 100.0(2) . . ?
C3 Fe3 C24 89.9(2) . . ?
C6 Fe3 C24 139.47(19) . . ?
C25 Fe3 C24 39.70(18) . . ?
C3 Fe3 C26 126.8(2) . . ?
C6 Fe3 C26 84.5(2) . . ?
C25 Fe3 C26 38.93(18) . . ?
C24 Fe3 C26 65.64(19) . . ?
C3 Fe3 C27 154.4(2) . . ?
C6 Fe3 C27 107.92(19) . . ?
C25 Fe3 C27 65.20(19) . . ?
C24 Fe3 C27 65.18(18) . . ?
C26 Fe3 C27 38.70(19) . . ?
C3 Fe3 C28 122.6(2) . . ?
C6 Fe3 C28 146.07(19) . . ?
C25 Fe3 C28 65.56(18) . . ?
C24 Fe3 C28 38.99(18) . . ?
C26 Fe3 C28 64.91(19) . . ?
C27 Fe3 C28 38.45(19) . . ?
C3 Fe3 P1 91.16(14) . . ?
C6 Fe3 P1 98.50(15) . . ?
C25 Fe3 P1 161.33(14) . . ?
C24 Fe3 P1 121.96(14) . . ?
C26 Fe3 P1 142.05(14) . . ?
C27 Fe3 P1 106.66(14) . . ?
C28 Fe3 P1 97.36(12) . . ?
C3 Fe3 Fe4 103.02(15) . . ?
C6 Fe3 Fe4 47.10(14) . . ?
C25 Fe3 Fe4 141.66(13) . . ?
C24 Fe3 Fe4 166.48(13) . . ?
C26 Fe3 Fe4 108.41(14) . . ?
C27 Fe3 Fe4 102.35(13) . . ?
C28 Fe3 Fe4 127.77(13) . . ?
P1 Fe3 Fe4 54.63(3) . . ?
C4 Fe4 C6 86.6(2) . . ?
C4 Fe4 C32 89.4(2) . . ?
C6 Fe4 C32 106.7(2) . . ?
C4 Fe4 C31 94.0(2) . . ?
C6 Fe4 C31 146.98(19) . . ?
C32 Fe4 C31 40.39(19) . . ?
C4 Fe4 C33 120.0(2) . . ?
C6 Fe4 C33 85.23(18) . . ?
C32 Fe4 C33 38.3(2) . . ?
C31 Fe4 C33 65.88(19) . . ?
C4 Fe4 C30 129.9(2) . . ?
C6 Fe4 C30 140.42(19) . . ?
C32 Fe4 C30 65.32(18) . . ?
C31 Fe4 C30 38.75(19) . . ?
C33 Fe4 C30 64.63(17) . . ?
C4 Fe4 C29 153.77(19) . . ?
C6 Fe4 C29 102.47(18) . . ?
C32 Fe4 C29 64.48(19) . . ?
C31 Fe4 C29 64.95(19) . . ?
C33 Fe4 C29 38.52(18) . . ?
C30 Fe4 C29 38.13(17) . . ?
C4 Fe4 P1 91.30(15) . . ?
C6 Fe4 P1 98.77(14) . . ?
C32 Fe4 P1 154.51(15) . . ?
C31 Fe4 P1 114.19(14) . . ?
C33 Fe4 P1 148.71(14) . . ?
C30 Fe4 P1 95.37(13) . . ?
C29 Fe4 P1 111.14(13) . . ?
C4 Fe4 Fe3 103.02(16) . . ?
C6 Fe4 Fe3 47.57(14) . . ?
C32 Fe4 Fe3 149.38(16) . . ?
C31 Fe4 Fe3 159.24(14) . . ?
C33 Fe4 Fe3 113.66(14) . . ?
C30 Fe4 Fe3 120.95(13) . . ?
C29 Fe4 Fe3 101.15(13) . . ?
P1 Fe4 Fe3 54.45(3) . . ?
C40 P1 Fe3 112.36(14) . . ?
C40 P1 Fe4 110.51(14) . . ?
Fe3 P1 Fe4 70.92(4) . . ?
C40 P1 Co1 107.16(14) . . ?
Fe3 P1 Co1 125.85(5) . . ?
Fe4 P1 Co1 126.13(5) . . ?
C34 P2 Fe1 112.59(14) . . ?
C34 P2 Fe2 110.37(13) . . ?
Fe1 P2 Fe2 70.98(4) . . ?
C34 P2 Co1 107.65(13) . . ?
Fe1 P2 Co1 124.53(5) . . ?
Fe2 P2 Co1 126.67(5) . . ?
O1 C1 Fe1 176.0(4) . . ?
O2 C2 Fe2 174.7(4) . . ?
O3 C3 Fe3 175.3(4) . . ?
O4 C4 Fe4 176.0(4) . . ?
O5 C5 Fe1 137.4(4) . . ?
O5 C5 Fe2 137.3(4) . . ?
Fe1 C5 Fe2 85.33(18) . . ?
O6 C6 Fe4 138.1(4) . . ?
O6 C6 Fe3 136.6(4) . . ?
Fe4 C6 Fe3 85.33(19) . . ?
O7 C7 Co1 178.7(4) . . ?
O8 C8 Co1 173.2(4) . . ?
O9 C9 Co1 171.9(4) . . ?
C15 C14 C18 107.8(4) . . ?
C15 C14 Fe1 71.7(3) . . ?
C18 C14 Fe1 70.0(3) . . ?
C15 C14 H14 126.1 . . ?
C18 C14 H14 126.1 . . ?
Fe1 C14 H14 123.9 . . ?
C14 C15 C16 108.3(4) . . ?
C14 C15 Fe1 69.6(3) . . ?
C16 C15 Fe1 71.5(3) . . ?
C14 C15 H15 125.8 . . ?
C16 C15 H15 125.8 . . ?
Fe1 C15 H15 124.6 . . ?
C15 C16 C17 107.9(4) . . ?
C15 C16 Fe1 70.0(3) . . ?
C17 C16 Fe1 70.0(3) . . ?
C15 C16 H16 126.1 . . ?
C17 C16 H16 126.1 . . ?
Fe1 C16 H16 125.5 . . ?
C18 C17 C16 108.2(4) . . ?
C18 C17 Fe1 69.4(3) . . ?
C16 C17 Fe1 71.4(3) . . ?
C18 C17 H17 125.9 . . ?
C16 C17 H17 125.9 . . ?
Fe1 C17 H17 124.9 . . ?
C17 C18 C14 107.8(4) . . ?
C17 C18 Fe1 71.9(3) . . ?
C14 C18 Fe1 70.4(3) . . ?
C17 C18 H18 126.1 . . ?
C14 C18 H18 126.1 . . ?
Fe1 C18 H18 123.3 . . ?
C20 C19 C23 107.5(4) . . ?
C20 C19 Fe2 69.0(2) . . ?
C23 C19 Fe2 70.5(3) . . ?
C20 C19 H19 126.3 . . ?
C23 C19 H19 126.3 . . ?
Fe2 C19 H19 125.8 . . ?
C19 C20 C21 108.1(4) . . ?
C19 C20 Fe2 72.2(3) . . ?
C21 C20 Fe2 70.1(3) . . ?
C19 C20 H20 126 . . ?
C21 C20 H20 126 . . ?
Fe2 C20 H20 123.3 . . ?
C22 C21 C20 107.0(4) . . ?
C22 C21 Fe2 71.8(3) . . ?
C20 C21 Fe2 69.9(3) . . ?
C22 C21 H21 126.5 . . ?
C20 C21 H21 126.5 . . ?
Fe2 C21 H21 123.5 . . ?
C21 C22 C23 109.0(5) . . ?
C21 C22 Fe2 69.7(3) . . ?
C23 C22 Fe2 71.0(3) . . ?
C21 C22 H22 125.5 . . ?
C23 C22 H22 125.5 . . ?
Fe2 C22 H22 125.4 . . ?
C22 C23 C19 108.4(5) . . ?
C22 C23 Fe2 70.6(3) . . ?
C19 C23 Fe2 70.9(3) . . ?
C22 C23 H23 125.8 . . ?
C19 C23 H23 125.8 . . ?
Fe2 C23 H23 124.3 . . ?
C28 C24 C25 107.6(4) . . ?
C28 C24 Fe3 71.8(3) . . ?
C25 C24 Fe3 70.1(3) . . ?
C28 C24 H24 126.2 . . ?
C25 C24 H24 126.2 . . ?
Fe3 C24 H24 123.6 . . ?
C26 C25 C24 107.8(4) . . ?
C26 C25 Fe3 71.4(3) . . ?
C24 C25 Fe3 70.2(3) . . ?
C26 C25 H25 126.1 . . ?
C24 C25 H25 126.1 . . ?
Fe3 C25 H25 123.9 . . ?
C25 C26 C27 108.1(4) . . ?
C25 C26 Fe3 69.6(3) . . ?
C27 C26 Fe3 71.0(3) . . ?
C25 C26 H26 126 . . ?
C27 C26 H26 126 . . ?
Fe3 C26 H26 125 . . ?
C28 C27 C26 108.5(4) . . ?
C28 C27 Fe3 70.8(3) . . ?
C26 C27 Fe3 70.3(3) . . ?
C28 C27 H27 125.8 . . ?
C26 C27 H27 125.8 . . ?
Fe3 C27 H27 124.8 . . ?
C27 C28 C24 108.0(4) . . ?
C27 C28 Fe3 70.7(3) . . ?
C24 C28 Fe3 69.2(3) . . ?
C27 C28 H28 126 . . ?
C24 C28 H28 126 . . ?
Fe3 C28 H28 125.6 . . ?
C30 C29 C33 108.1(4) . . ?
C30 C29 Fe4 70.1(2) . . ?
C33 C29 Fe4 69.6(2) . . ?
C30 C29 H29 126 . . ?
C33 C29 H29 126 . . ?
Fe4 C29 H29 125.9 . . ?
C29 C30 C31 109.0(4) . . ?
C29 C30 Fe4 71.8(2) . . ?
C31 C30 Fe4 69.2(2) . . ?
C29 C30 H30 125.5 . . ?
C31 C30 H30 125.5 . . ?
Fe4 C30 H30 125.1 . . ?
C30 C31 C32 106.3(4) . . ?
C30 C31 Fe4 72.1(3) . . ?
C32 C31 Fe4 69.7(3) . . ?
C30 C31 H31 126.8 . . ?
C32 C31 H31 126.8 . . ?
Fe4 C31 H31 123.1 . . ?
C33 C32 C31 108.4(4) . . ?
C33 C32 Fe4 72.1(3) . . ?
C31 C32 Fe4 69.9(3) . . ?
C33 C32 H32 125.8 . . ?
C31 C32 H32 125.8 . . ?
Fe4 C32 H32 123.7 . . ?
C32 C33 C29 108.3(4) . . ?
C32 C33 Fe4 69.5(3) . . ?
C29 C33 Fe4 71.9(2) . . ?
C32 C33 H33 125.9 . . ?
C29 C33 H33 125.9 . . ?
Fe4 C33 H33 124.3 . . ?
C35 C34 C39 109.6(4) . . ?
C35 C34 P2 115.8(3) . . ?
C39 C34 P2 113.8(3) . . ?
C35 C34 H34 105.6 . . ?
C39 C34 H34 105.6 . . ?
P2 C34 H34 105.6 . . ?
C36 C35 C34 110.1(4) . . ?
C36 C35 H35A 109.6 . . ?
C34 C35 H35A 109.6 . . ?
C36 C35 H35B 109.6 . . ?
C34 C35 H35B 109.6 . . ?
H35A C35 H35B 108.2 . . ?
C37 C36 C35 111.2(4) . . ?
C37 C36 H36A 109.4 . . ?
C35 C36 H36A 109.4 . . ?
C37 C36 H36B 109.4 . . ?
C35 C36 H36B 109.4 . . ?
H36A C36 H36B 108 . . ?
C36 C37 C38 111.8(4) . . ?
C36 C37 H37A 109.3 . . ?
C38 C37 H37A 109.3 . . ?
C36 C37 H37B 109.3 . . ?
C38 C37 H37B 109.3 . . ?
H37A C37 H37B 107.9 . . ?
C37 C38 C39 110.3(4) . . ?
C37 C38 H38A 109.6 . . ?
C39 C38 H38A 109.6 . . ?
C37 C38 H38B 109.6 . . ?
C39 C38 H38B 109.6 . . ?
H38A C38 H38B 108.1 . . ?
C34 C39 C38 110.7(4) . . ?
C34 C39 H39A 109.5 . . ?
C38 C39 H39A 109.5 . . ?
C34 C39 H39B 109.5 . . ?
C38 C39 H39B 109.5 . . ?
H39A C39 H39B 108.1 . . ?
C45 C40 C41 109.3(4) . . ?
C45 C40 P1 114.0(3) . . ?
C41 C40 P1 115.2(3) . . ?
C45 C40 H40 105.8 . . ?
C41 C40 H40 105.8 . . ?
P1 C40 H40 105.8 . . ?
C42 C41 C40 110.6(4) . . ?
C42 C41 H41A 109.5 . . ?
C40 C41 H41A 109.5 . . ?
C42 C41 H41B 109.5 . . ?
C40 C41 H41B 109.5 . . ?
H41A C41 H41B 108.1 . . ?
C41 C42 C43 110.8(4) . . ?
C41 C42 H42A 109.5 . . ?
C43 C42 H42A 109.5 . . ?
C41 C42 H42B 109.5 . . ?
C43 C42 H42B 109.5 . . ?
H42A C42 H42B 108.1 . . ?
C44 C43 C42 111.9(4) . . ?
C44 C43 H43A 109.2 . . ?
C42 C43 H43A 109.2 . . ?
C44 C43 H43B 109.2 . . ?
C42 C43 H43B 109.2 . . ?
H43A C43 H43B 107.9 . . ?
C43 C44 C45 110.4(4) . . ?
C43 C44 H44A 109.6 . . ?
C45 C44 H44A 109.6 . . ?
C43 C44 H44B 109.6 . . ?
C45 C44 H44B 109.6 . . ?
H44A C44 H44B 108.1 . . ?
C40 C45 C44 110.1(4) . . ?
C40 C45 H45A 109.6 . . ?
C44 C45 H45A 109.6 . . ?
C40 C45 H45B 109.6 . . ?
C44 C45 H45B 109.6 . . ?
H45A C45 H45B 108.2 . . ?
C8 Co1 C9 140.39(19) . . ?
C8 Co1 C7 111.25(19) . . ?
C9 Co1 C7 108.36(19) . . ?
C8 Co1 P1 88.37(13) . . ?
C9 Co1 P1 88.05(14) . . ?
C7 Co1 P1 96.15(14) . . ?
C8 Co1 P2 87.49(13) . . ?
C9 Co1 P2 86.20(13) . . ?
C7 Co1 P2 98.46(14) . . ?
P1 Co1 P2 165.34(5) . . ?
C12 Co2 C11 108.2(2) . . ?
C12 Co2 C10 109.9(2) . . ?
C11 Co2 C10 108.5(3) . . ?
C12 Co2 C13 110.3(2) . . ?
C11 Co2 C13 109.8(2) . . ?
C10 Co2 C13 110.1(2) . . ?
O10 C10 Co2 179.3(6) . . ?
O11 C11 Co2 177.5(5) . . ?
O12 C12 Co2 179.3(5) . . ?
O13 C13 Co2 178.1(4) . . ?
Cl1 C99 Cl2 113.8(3) . . ?
Cl1 C99 H99A 108.8 . . ?
Cl2 C99 H99A 108.8 . . ?
Cl1 C99 H99B 108.8 . . ?
Cl2 C99 H99B 108.8 . . ?
H99A C99 H99B 107.7 . . ?
 
#===END

data_compound5a
 
_audit_creation_method                  'WinGX routine CIF_UPDATE'
_audit_conform_dict_name                cif_core.dic
_audit_conform_dict_version             2.3
_audit_conform_dict_location            ftp://ftp.iucr.org/pub/cif_core.dic
_publ_requested_category                FM
 
#----------------------------------------------------------------------------#
#                   CHEMICAL INFORMATION                                     #
#----------------------------------------------------------------------------#
 
_chemical_name_systematic
;
 ?
;
_chemical_formula_moiety                'C24 H21 Cr1 Fe2 O8 P1'
_chemical_formula_sum                   'C24 H21 Cr1 Fe2 O8 P1'
_chemical_formula_weight                632.08
_chemical_compound_source               'synthesis as described'
 
#----------------------------------------------------------------------------#
#                   UNIT CELL INFORMATION                                    #
#----------------------------------------------------------------------------#
 
_symmetry_cell_setting                  monoclinic
_symmetry_space_group_name_H-M          'P 1 21/n 1'
_symmetry_space_group_name_Hall         '-P 2yn'
_symmetry_Int_Tables_number             14
loop_
    _symmetry_equiv_pos_as_xyz
'x, y, z'
'-x+1/2, y+1/2, -z+1/2'
'-x, -y, -z'
'x-1/2, -y-1/2, z-1/2'
 
_cell_length_a                          9.7622(2)
_cell_length_b                          18.5003(3)
_cell_length_c                          13.3338(2)
_cell_angle_alpha                       90
_cell_angle_beta                        95.0240(10)
_cell_angle_gamma                       90
_cell_volume                            2398.88(7)
_cell_formula_units_Z                   4
_cell_measurement_temperature           100.0(1)
_cell_measurement_reflns_used           9802
_cell_measurement_theta_min             2.2
_cell_measurement_theta_max             28.275
_cell_measurement_wavelength            0.71073
 
#----------------------------------------------------------------------------#
#                   CRYSTAL INFORMATION                                      #
#----------------------------------------------------------------------------#
 
_exptl_crystal_description              prism
_exptl_crystal_colour                   black
_exptl_crystal_size_max                 0.28
_exptl_crystal_size_mid                 0.23
_exptl_crystal_size_min                 0.23
_exptl_crystal_density_diffrn           1.75
_exptl_crystal_density_method           'not measured'
_exptl_crystal_F_000                    1280
_exptl_special_details
;
 ?
;
 
#----------------------------------------------------------------------------#
#                   ABSORPTION CORRECTION                                    #
#----------------------------------------------------------------------------#
 
_exptl_absorpt_coefficient_mu           1.754
_exptl_absorpt_correction_type          multi-scan
_exptl_absorpt_process_details		'BRUKER Sadabs'
_exptl_absorpt_correction_T_min         0.5814
_exptl_absorpt_correction_T_max         0.6667
 
#----------------------------------------------------------------------------#
#                   DATA COLLECTION                                          #
#----------------------------------------------------------------------------#
 
_diffrn_ambient_temperature             100.0(1)
_diffrn_radiation_wavelength            0.71073
_diffrn_radiation_source                'fine-focus sealed tube'
_diffrn_radiation_type                  MoK\a
_diffrn_radiation_monochromator         graphite
_diffrn_measurement_device              'four-circle diffractometer' 
_diffrn_measurement_device_type         'BRUKER APPEX-II CCD'
_diffrn_measurement_method              'omega/phi scans'
_diffrn_radiation_probe                 x-ray
_diffrn_reflns_av_R_equivalents         0.037
_diffrn_reflns_av_unetI/netI            0.018
_diffrn_reflns_number                   78988 
_diffrn_reflns_limit_h_min              -12
_diffrn_reflns_limit_h_max              12
_diffrn_reflns_limit_k_min              0
_diffrn_reflns_limit_k_max              24
_diffrn_reflns_limit_l_min              0
_diffrn_reflns_limit_l_max              17
_diffrn_reflns_theta_min                1.89
_diffrn_reflns_theta_max                27.88
_diffrn_reflns_theta_full               27.88
_diffrn_measured_fraction_theta_full
                                        1
_diffrn_measured_fraction_theta_max
                                        1
_reflns_number_total                    5730
_reflns_number_gt                       5050
_reflns_threshold_expression            >2sigma(I)
 
#----------------------------------------------------------------------------#
#                   COMPUTER PROGRAMS USED                                   #
#----------------------------------------------------------------------------#
 
_computing_data_collection              'BRUKER APEX'
_computing_cell_refinement              'BRUKER APEX'
_computing_structure_solution           'SHELXL-97 (Sheldrick, 1997)'
_computing_structure_refinement         'SHELXL-97 (Sheldrick, 1997)'
_computing_molecular_graphics           'Ortep-3 for Windows (Farrugia, 1997)'
_computing_publication_material
                                   'WinGX publication routines (Farrugia, 1999)'
 
#----------------------------------------------------------------------------#
#                   REFINEMENT INFORMATION                                   #
#----------------------------------------------------------------------------#
 
_refine_special_details
;
 Refinement of F^2^ against ALL reflections.  The weighted R-factor wR and
 goodness of fit S are based on F^2^, conventional R-factors R are based
 on F, with F set to zero for negative F^2^. The threshold expression of
 F^2^ > 2sigma(F^2^) is used only for calculating R-factors(gt) etc. and is
 not relevant to the choice of reflections for refinement.  R-factors based
 on F^2^ are statistically about twice as large as those based on F, and R-
 factors based on ALL data will be even larger.
;
_refine_ls_structure_factor_coef        Fsqd
_refine_ls_matrix_type                  full
_refine_ls_weighting_scheme             calc
_refine_ls_weighting_details
         'calc w=1/[\s^2^(Fo^2^)+(0.0242P)^2^+1.3570P] where P=(Fo^2^+2Fc^2^)/3'
_atom_sites_solution_primary            direct
_atom_sites_solution_secondary          difmap
_atom_sites_solution_hydrogens          geom
_refine_ls_hydrogen_treatment           constr
_refine_ls_extinction_method            none
_refine_ls_number_reflns                5730
_refine_ls_number_parameters            325
_refine_ls_number_restraints            0
_refine_ls_R_factor_all                 0.027
_refine_ls_R_factor_gt                  0.0214
_refine_ls_wR_factor_ref                0.053
_refine_ls_wR_factor_gt                 0.0508
_refine_ls_goodness_of_fit_ref          1.043
_refine_ls_restrained_S_all             1.043
_refine_ls_shift/su_max                 0.001
_refine_ls_shift/su_mean                0
_refine_diff_density_max                0.366
_refine_diff_density_min                -0.31
_refine_diff_density_rms                0.06
 
#----------------------------------------------------------------------------#
#                   ATOMIC TYPES, COORDINATES AND THERMAL PARAMETERS         #
#----------------------------------------------------------------------------#
 
loop_
    _atom_type_symbol
    _atom_type_description
    _atom_type_scat_dispersion_real
    _atom_type_scat_dispersion_imag
    _atom_type_scat_source
C C 0.0033 0.0016 'International Tables Vol C Tables 4.2.6.8 and 6.1.1.4'
H H 0 0 'International Tables Vol C Tables 4.2.6.8 and 6.1.1.4'
Cr Cr 0.3209 0.6236 'International Tables Vol C Tables 4.2.6.8 and 6.1.1.4'
Fe Fe 0.3463 0.8444 'International Tables Vol C Tables 4.2.6.8 and 6.1.1.4'
O O 0.0106 0.006 'International Tables Vol C Tables 4.2.6.8 and 6.1.1.4'
P P 0.1023 0.0942 'International Tables Vol C Tables 4.2.6.8 and 6.1.1.4'
 
loop_
    _atom_site_label
    _atom_site_type_symbol
    _atom_site_fract_x
    _atom_site_fract_y
    _atom_site_fract_z
    _atom_site_U_iso_or_equiv
    _atom_site_adp_type
    _atom_site_occupancy
    _atom_site_symmetry_multiplicity
    _atom_site_calc_flag
    _atom_site_refinement_flags
    _atom_site_disorder_assembly
    _atom_site_disorder_group
Fe1 Fe 0.36460(2) 0.116724(11) 0.629366(15) 0.01017(5) Uani 1 1 d . . .
Fe2 Fe 0.04690(2) 0.208164(11) 0.762660(15) 0.01124(5) Uani 1 1 d . . .
Cr1 Cr 0.41918(2) 0.094925(12) 0.831950(17) 0.01134(6) Uani 1 1 d . . .
P1 P 0.20096(3) 0.114113(19) 0.74064(3) 0.00935(7) Uani 1 1 d . . .
O1 O 0.30204(12) -0.02867(6) 0.55823(9) 0.0250(3) Uani 1 1 d . . .
O2 O -0.00591(14) 0.15552(7) 0.96087(9) 0.0295(3) Uani 1 1 d . . .
O3 O 0.25161(12) 0.30960(7) 0.84856(11) 0.0340(3) Uani 1 1 d . . .
O4 O 0.62522(11) 0.04492(6) 0.68631(9) 0.0222(2) Uani 1 1 d . . .
O5 O 0.52310(11) 0.24886(6) 0.85460(9) 0.0227(2) Uani 1 1 d . . .
O6 O 0.29035(13) 0.10860(7) 1.02961(9) 0.0300(3) Uani 1 1 d . . .
O7 O 0.70173(12) 0.06751(8) 0.93438(10) 0.0346(3) Uani 1 1 d . . .
O8 O 0.38255(12) -0.06805(6) 0.84278(9) 0.0239(3) Uani 1 1 d . . .
C1 C 0.32385(15) 0.02874(8) 0.58894(11) 0.0154(3) Uani 1 1 d . . .
C2 C 0.01938(16) 0.17326(8) 0.88285(12) 0.0180(3) Uani 1 1 d . . .
C3 C 0.17726(16) 0.26725(9) 0.81376(12) 0.0196(3) Uani 1 1 d . . .
C4 C 0.52496(15) 0.07198(8) 0.71196(11) 0.0152(3) Uani 1 1 d . . .
C5 C 0.47516(15) 0.19249(8) 0.84140(11) 0.0157(3) Uani 1 1 d . . .
C6 C 0.33768(15) 0.10340(8) 0.95461(12) 0.0179(3) Uani 1 1 d . . .
C7 C 0.59245(16) 0.07745(9) 0.89819(12) 0.0213(3) Uani 1 1 d . . .
C8 C 0.39007(15) -0.00655(8) 0.83585(11) 0.0161(3) Uani 1 1 d . . .
C9 C 0.48985(15) 0.21016(8) 0.60671(11) 0.0154(3) Uani 1 1 d . . .
H9 H 0.5585 0.2283 0.6526 0.019 Uiso 1 1 calc R . .
C10 C 0.34954(15) 0.23010(8) 0.60050(11) 0.0152(3) Uani 1 1 d . . .
H10 H 0.31 0.2635 0.6414 0.018 Uiso 1 1 calc R . .
C11 C 0.27988(15) 0.19013(8) 0.52095(11) 0.0161(3) Uani 1 1 d . . .
H11 H 0.1865 0.1925 0.5002 0.019 Uiso 1 1 calc R . .
C12 C 0.37907(16) 0.14559(8) 0.47861(11) 0.0176(3) Uani 1 1 d . . .
H12 H 0.3616 0.1137 0.4251 0.021 Uiso 1 1 calc R . .
C13 C 0.50832(15) 0.15817(8) 0.53181(11) 0.0169(3) Uani 1 1 d . . .
H13 H 0.5908 0.1361 0.5196 0.02 Uiso 1 1 calc R . .
C14 C -0.14630(14) 0.18010(8) 0.69010(12) 0.0168(3) Uani 1 1 d . . .
H14 H -0.1917 0.1368 0.7 0.02 Uiso 1 1 calc R . .
C15 C -0.05347(15) 0.19348(8) 0.61620(12) 0.0162(3) Uani 1 1 d . . .
H15 H -0.0281 0.1606 0.5685 0.019 Uiso 1 1 calc R . .
C16 C -0.00616(15) 0.26550(8) 0.62753(12) 0.0174(3) Uani 1 1 d . . .
H16 H 0.0567 0.288 0.5892 0.021 Uiso 1 1 calc R . .
C17 C -0.07191(15) 0.29758(8) 0.70823(12) 0.0179(3) Uani 1 1 d . . .
H17 H -0.06 0.3448 0.7312 0.021 Uiso 1 1 calc R . .
C18 C -0.15756(15) 0.24534(8) 0.74672(12) 0.0178(3) Uani 1 1 d . . .
H18 H -0.2121 0.2519 0.7998 0.021 Uiso 1 1 calc R . .
C19 C 0.10261(14) 0.02659(7) 0.73251(11) 0.0111(3) Uani 1 1 d . . .
H19 H 0.1726 -0.0108 0.7267 0.013 Uiso 1 1 calc R . .
C20 C -0.00055(14) 0.01559(8) 0.64027(11) 0.0135(3) Uani 1 1 d . . .
H20A H -0.0792 0.0471 0.6449 0.016 Uiso 1 1 calc R . .
H20B H 0.0422 0.028 0.5796 0.016 Uiso 1 1 calc R . .
C21 C -0.04821(15) -0.06337(8) 0.63480(12) 0.0166(3) Uani 1 1 d . . .
H21A H -0.1151 -0.0697 0.5773 0.02 Uiso 1 1 calc R . .
H21B H 0.0297 -0.0944 0.6255 0.02 Uiso 1 1 calc R . .
C22 C -0.11242(15) -0.08531(8) 0.73075(12) 0.0176(3) Uani 1 1 d . . .
H22A H -0.1965 -0.0581 0.7357 0.021 Uiso 1 1 calc R . .
H22B H -0.1359 -0.1363 0.7273 0.021 Uiso 1 1 calc R . .
C23 C -0.01465(16) -0.07143(8) 0.82378(12) 0.0189(3) Uani 1 1 d . . .
H23A H 0.0643 -0.1032 0.8229 0.023 Uiso 1 1 calc R . .
H23B H -0.0608 -0.0825 0.8835 0.023 Uiso 1 1 calc R . .
C24 C 0.03439(15) 0.00714(8) 0.82878(11) 0.0156(3) Uani 1 1 d . . .
H24A H 0.0998 0.0138 0.8871 0.019 Uiso 1 1 calc R . .
H24B H -0.0432 0.0389 0.8357 0.019 Uiso 1 1 calc R . .
 
loop_
    _atom_site_aniso_label
    _atom_site_aniso_U_11
    _atom_site_aniso_U_22
    _atom_site_aniso_U_33
    _atom_site_aniso_U_23
    _atom_site_aniso_U_13
    _atom_site_aniso_U_12
Fe1 0.00997(10) 0.01032(10) 0.01051(10) 0.00095(8) 0.00253(7) -0.00023(7)
Fe2 0.01019(10) 0.01062(10) 0.01310(11) -0.00056(8) 0.00216(8) 0.00089(7)
Cr1 0.00969(11) 0.01283(12) 0.01138(11) 0.00177(9) 0.00023(8) -0.00036(8)
P1 0.00888(16) 0.00940(17) 0.00988(17) 0.00016(13) 0.00154(13) -0.00026(12)
O1 0.0320(6) 0.0167(6) 0.0281(6) -0.0068(5) 0.0132(5) -0.0039(5)
O2 0.0468(8) 0.0256(6) 0.0176(6) 0.0020(5) 0.0116(6) 0.0099(6)
O3 0.0213(6) 0.0282(7) 0.0519(9) -0.0194(6) 0.0005(6) -0.0056(5)
O4 0.0158(5) 0.0280(6) 0.0234(6) 0.0057(5) 0.0057(4) 0.0082(5)
O5 0.0224(6) 0.0200(6) 0.0257(6) -0.0023(5) 0.0010(5) -0.0068(5)
O6 0.0282(6) 0.0444(8) 0.0184(6) -0.0075(5) 0.0078(5) -0.0132(6)
O7 0.0176(6) 0.0514(9) 0.0332(7) 0.0100(6) -0.0067(5) 0.0039(6)
O8 0.0264(6) 0.0152(6) 0.0299(7) 0.0046(5) 0.0015(5) 0.0034(5)
C1 0.0148(7) 0.0174(8) 0.0149(7) 0.0017(6) 0.0064(6) 0.0009(6)
C2 0.0205(7) 0.0160(7) 0.0180(8) -0.0023(6) 0.0037(6) 0.0053(6)
C3 0.0163(7) 0.0177(8) 0.0253(8) -0.0038(7) 0.0045(6) 0.0043(6)
C4 0.0135(7) 0.0147(7) 0.0174(7) 0.0053(6) 0.0016(6) -0.0005(6)
C5 0.0129(7) 0.0221(8) 0.0119(7) 0.0014(6) 0.0010(5) 0.0003(6)
C6 0.0157(7) 0.0192(8) 0.0181(8) -0.0016(6) -0.0024(6) -0.0059(6)
C7 0.0189(8) 0.0261(9) 0.0186(8) 0.0044(7) 0.0011(6) 0.0005(6)
C8 0.0133(7) 0.0205(8) 0.0146(7) 0.0026(6) 0.0006(5) 0.0031(6)
C9 0.0142(7) 0.0161(7) 0.0160(7) 0.0056(6) 0.0017(6) -0.0058(6)
C10 0.0182(7) 0.0099(7) 0.0181(7) 0.0034(6) 0.0060(6) 0.0004(5)
C11 0.0136(7) 0.0181(7) 0.0165(7) 0.0080(6) 0.0004(6) -0.0006(6)
C12 0.0246(8) 0.0181(8) 0.0109(7) 0.0024(6) 0.0054(6) -0.0034(6)
C13 0.0160(7) 0.0178(7) 0.0181(8) 0.0060(6) 0.0092(6) 0.0004(6)
C14 0.0099(6) 0.0170(7) 0.0228(8) 0.0002(6) -0.0019(6) -0.0002(5)
C15 0.0140(7) 0.0181(7) 0.0158(7) -0.0007(6) -0.0023(6) 0.0033(6)
C16 0.0168(7) 0.0169(7) 0.0185(8) 0.0050(6) 0.0009(6) 0.0036(6)
C17 0.0171(7) 0.0132(7) 0.0232(8) 0.0019(6) 0.0007(6) 0.0053(6)
C18 0.0110(7) 0.0190(8) 0.0236(8) -0.0009(6) 0.0024(6) 0.0052(6)
C19 0.0116(6) 0.0094(6) 0.0127(7) 0.0004(5) 0.0023(5) -0.0010(5)
C20 0.0143(7) 0.0125(7) 0.0136(7) 0.0001(5) 0.0002(5) -0.0016(5)
C21 0.0157(7) 0.0145(7) 0.0195(8) -0.0029(6) 0.0010(6) -0.0037(6)
C22 0.0156(7) 0.0118(7) 0.0260(8) 0.0013(6) 0.0043(6) -0.0029(6)
C23 0.0188(7) 0.0178(8) 0.0205(8) 0.0067(6) 0.0044(6) -0.0029(6)
C24 0.0152(7) 0.0177(7) 0.0141(7) 0.0019(6) 0.0025(6) -0.0022(6)
 
 
#----------------------------------------------------------------------------#
#                   MOLECULAR GEOMETRY                                       #
#----------------------------------------------------------------------------#
 
_geom_special_details
;
 All esds (except the esd in the dihedral angle between two l.s. planes)
 are estimated using the full covariance matrix.  The cell esds are taken
 into account individually in the estimation of esds in distances, angles
 and torsion angles; correlations between esds in cell parameters are only
 used when they are defined by crystal symmetry.  An approximate (isotropic)
 treatment of cell esds is used for estimating esds involving l.s. planes.
;
loop_
    _geom_bond_atom_site_label_1
    _geom_bond_atom_site_label_2
    _geom_bond_distance
    _geom_bond_site_symmetry_2
    _geom_bond_publ_flag
Fe1 C1 1.7495(15) . ?
Fe1 C4 2.0117(15) . ?
Fe1 C12 2.0966(15) . ?
Fe1 C11 2.0997(15) . ?
Fe1 C10 2.1353(14) . ?
Fe1 C13 2.1373(14) . ?
Fe1 C9 2.1539(14) . ?
Fe1 P1 2.2739(4) . ?
Fe1 Cr1 2.7370(3) . ?
Fe2 C3 1.7683(16) . ?
Fe2 C2 1.7700(16) . ?
Fe2 C18 2.1043(14) . ?
Fe2 C14 2.1080(15) . ?
Fe2 C17 2.1121(15) . ?
Fe2 C16 2.1157(15) . ?
Fe2 C15 2.1243(15) . ?
Fe2 P1 2.3351(4) . ?
Cr1 C7 1.8666(16) . ?
Cr1 C6 1.8868(16) . ?
Cr1 C5 1.8869(16) . ?
Cr1 C8 1.9001(16) . ?
Cr1 C4 2.0238(15) . ?
Cr1 P1 2.3859(4) . ?
P1 C19 1.8807(14) . ?
O1 C1 1.1514(19) . ?
O2 C2 1.1384(19) . ?
O3 C3 1.139(2) . ?
O4 C4 1.1766(18) . ?
O5 C5 1.1503(19) . ?
O6 C6 1.1419(19) . ?
O7 C7 1.147(2) . ?
O8 C8 1.1444(19) . ?
C9 C13 1.409(2) . ?
C9 C10 1.414(2) . ?
C9 H9 0.93 . ?
C10 C11 1.417(2) . ?
C10 H10 0.93 . ?
C11 C12 1.425(2) . ?
C11 H11 0.93 . ?
C12 C13 1.412(2) . ?
C12 H12 0.93 . ?
C13 H13 0.93 . ?
C14 C15 1.418(2) . ?
C14 C18 1.433(2) . ?
C14 H14 0.93 . ?
C15 C16 1.414(2) . ?
C15 H15 0.93 . ?
C16 C17 1.429(2) . ?
C16 H16 0.93 . ?
C17 C18 1.404(2) . ?
C17 H17 0.93 . ?
C18 H18 0.93 . ?
C19 C20 1.5334(19) . ?
C19 C24 1.5396(19) . ?
C19 H19 0.98 . ?
C20 C21 1.533(2) . ?
C20 H20A 0.97 . ?
C20 H20B 0.97 . ?
C21 C22 1.528(2) . ?
C21 H21A 0.97 . ?
C21 H21B 0.97 . ?
C22 C23 1.519(2) . ?
C22 H22A 0.97 . ?
C22 H22B 0.97 . ?
C23 C24 1.530(2) . ?
C23 H23A 0.97 . ?
C23 H23B 0.97 . ?
C24 H24A 0.97 . ?
C24 H24B 0.97 . ?
 
loop_
    _geom_angle_atom_site_label_1
    _geom_angle_atom_site_label_2
    _geom_angle_atom_site_label_3
    _geom_angle
    _geom_angle_site_symmetry_1
    _geom_angle_site_symmetry_3
    _geom_angle_publ_flag
C1 Fe1 C4 86.04(7) . . ?
C1 Fe1 C12 88.52(7) . . ?
C4 Fe1 C12 121.01(6) . . ?
C1 Fe1 C11 108.93(7) . . ?
C4 Fe1 C11 152.10(6) . . ?
C12 Fe1 C11 39.71(6) . . ?
C1 Fe1 C10 148.02(7) . . ?
C4 Fe1 C10 122.74(6) . . ?
C12 Fe1 C10 65.56(6) . . ?
C11 Fe1 C10 39.09(6) . . ?
C1 Fe1 C13 106.86(6) . . ?
C4 Fe1 C13 87.71(6) . . ?
C12 Fe1 C13 38.94(6) . . ?
C11 Fe1 C13 65.73(6) . . ?
C10 Fe1 C13 64.94(6) . . ?
C1 Fe1 C9 145.09(6) . . ?
C4 Fe1 C9 89.02(6) . . ?
C12 Fe1 C9 64.81(6) . . ?
C11 Fe1 C9 65.07(6) . . ?
C10 Fe1 C9 38.49(5) . . ?
C13 Fe1 C9 38.35(6) . . ?
C1 Fe1 P1 91.57(5) . . ?
C4 Fe1 P1 101.04(4) . . ?
C12 Fe1 P1 137.83(5) . . ?
C11 Fe1 P1 101.89(4) . . ?
C10 Fe1 P1 95.58(4) . . ?
C13 Fe1 P1 160.19(4) . . ?
C9 Fe1 P1 123.26(4) . . ?
C1 Fe1 Cr1 100.74(5) . . ?
C4 Fe1 Cr1 47.48(4) . . ?
C12 Fe1 Cr1 163.77(4) . . ?
C11 Fe1 Cr1 143.68(4) . . ?
C10 Fe1 Cr1 109.09(4) . . ?
C13 Fe1 Cr1 124.90(4) . . ?
C9 Fe1 Cr1 101.12(4) . . ?
P1 Fe1 Cr1 55.951(11) . . ?
C3 Fe2 C2 92.17(8) . . ?
C3 Fe2 C18 118.76(7) . . ?
C2 Fe2 C18 89.59(7) . . ?
C3 Fe2 C14 156.05(7) . . ?
C2 Fe2 C14 97.18(7) . . ?
C18 Fe2 C14 39.78(6) . . ?
C3 Fe2 C17 90.19(7) . . ?
C2 Fe2 C17 118.33(6) . . ?
C18 Fe2 C17 38.91(6) . . ?
C14 Fe2 C17 65.97(6) . . ?
C3 Fe2 C16 97.61(7) . . ?
C2 Fe2 C16 155.33(6) . . ?
C18 Fe2 C16 65.85(6) . . ?
C14 Fe2 C16 65.81(6) . . ?
C17 Fe2 C16 39.52(6) . . ?
C3 Fe2 C15 133.77(7) . . ?
C2 Fe2 C15 133.74(7) . . ?
C18 Fe2 C15 65.91(6) . . ?
C14 Fe2 C15 39.14(6) . . ?
C17 Fe2 C15 65.74(6) . . ?
C16 Fe2 C15 38.96(6) . . ?
C3 Fe2 P1 93.41(5) . . ?
C2 Fe2 P1 89.57(5) . . ?
C18 Fe2 P1 147.83(4) . . ?
C14 Fe2 P1 108.60(4) . . ?
C17 Fe2 P1 151.73(5) . . ?
C16 Fe2 P1 112.26(4) . . ?
C15 Fe2 P1 92.26(4) . . ?
C7 Cr1 C6 92.16(7) . . ?
C7 Cr1 C5 83.62(7) . . ?
C6 Cr1 C5 90.25(6) . . ?
C7 Cr1 C8 86.99(7) . . ?
C6 Cr1 C8 89.02(7) . . ?
C5 Cr1 C8 170.55(6) . . ?
C7 Cr1 C4 80.43(7) . . ?
C6 Cr1 C4 170.31(6) . . ?
C5 Cr1 C4 95.08(6) . . ?
C8 Cr1 C4 84.39(6) . . ?
C7 Cr1 P1 177.29(5) . . ?
C6 Cr1 P1 90.26(5) . . ?
C5 Cr1 P1 97.60(5) . . ?
C8 Cr1 P1 91.83(5) . . ?
C4 Cr1 P1 97.03(4) . . ?
C7 Cr1 Fe1 125.63(5) . . ?
C6 Cr1 Fe1 141.52(5) . . ?
C5 Cr1 Fe1 87.43(5) . . ?
C8 Cr1 Fe1 98.97(5) . . ?
C4 Cr1 Fe1 47.11(4) . . ?
P1 Cr1 Fe1 52.156(10) . . ?
C19 P1 Fe1 111.40(4) . . ?
C19 P1 Fe2 108.52(4) . . ?
Fe1 P1 Fe2 124.277(17) . . ?
C19 P1 Cr1 109.26(5) . . ?
Fe1 P1 Cr1 71.893(12) . . ?
Fe2 P1 Cr1 127.070(17) . . ?
O1 C1 Fe1 176.16(13) . . ?
O2 C2 Fe2 174.19(14) . . ?
O3 C3 Fe2 173.61(14) . . ?
O4 C4 Fe1 130.03(12) . . ?
O4 C4 Cr1 144.51(12) . . ?
Fe1 C4 Cr1 85.41(6) . . ?
O5 C5 Cr1 171.52(13) . . ?
O6 C6 Cr1 178.94(14) . . ?
O7 C7 Cr1 176.51(15) . . ?
O8 C8 Cr1 174.44(13) . . ?
C13 C9 C10 108.66(13) . . ?
C13 C9 Fe1 70.19(8) . . ?
C10 C9 Fe1 70.04(8) . . ?
C13 C9 H9 125.7 . . ?
C10 C9 H9 125.7 . . ?
Fe1 C9 H9 125.7 . . ?
C9 C10 C11 107.85(13) . . ?
C9 C10 Fe1 71.46(8) . . ?
C11 C10 Fe1 69.10(8) . . ?
C9 C10 H10 126.1 . . ?
C11 C10 H10 126.1 . . ?
Fe1 C10 H10 124.9 . . ?
C10 C11 C12 107.46(13) . . ?
C10 C11 Fe1 71.81(8) . . ?
C12 C11 Fe1 70.03(8) . . ?
C10 C11 H11 126.3 . . ?
C12 C11 H11 126.3 . . ?
Fe1 C11 H11 123.5 . . ?
C13 C12 C11 108.30(14) . . ?
C13 C12 Fe1 72.09(9) . . ?
C11 C12 Fe1 70.26(8) . . ?
C13 C12 H12 125.9 . . ?
C11 C12 H12 125.9 . . ?
Fe1 C12 H12 123.4 . . ?
C9 C13 C12 107.72(13) . . ?
C9 C13 Fe1 71.46(8) . . ?
C12 C13 Fe1 68.97(8) . . ?
C9 C13 H13 126.1 . . ?
C12 C13 H13 126.1 . . ?
Fe1 C13 H13 125 . . ?
C15 C14 C18 107.59(13) . . ?
C15 C14 Fe2 71.05(8) . . ?
C18 C14 Fe2 69.97(8) . . ?
C15 C14 H14 126.2 . . ?
C18 C14 H14 126.2 . . ?
Fe2 C14 H14 124.4 . . ?
C16 C15 C14 108.23(13) . . ?
C16 C15 Fe2 70.19(9) . . ?
C14 C15 Fe2 69.81(9) . . ?
C16 C15 H15 125.9 . . ?
C14 C15 H15 125.9 . . ?
Fe2 C15 H15 125.7 . . ?
C15 C16 C17 107.92(13) . . ?
C15 C16 Fe2 70.85(9) . . ?
C17 C16 Fe2 70.10(9) . . ?
C15 C16 H16 126 . . ?
C17 C16 H16 126 . . ?
Fe2 C16 H16 124.6 . . ?
C18 C17 C16 108.09(14) . . ?
C18 C17 Fe2 70.25(9) . . ?
C16 C17 Fe2 70.38(8) . . ?
C18 C17 H17 126 . . ?
C16 C17 H17 126 . . ?
Fe2 C17 H17 125 . . ?
C17 C18 C14 108.15(14) . . ?
C17 C18 Fe2 70.85(8) . . ?
C14 C18 Fe2 70.25(8) . . ?
C17 C18 H18 125.9 . . ?
C14 C18 H18 125.9 . . ?
Fe2 C18 H18 124.6 . . ?
C20 C19 C24 109.64(11) . . ?
C20 C19 P1 117.16(10) . . ?
C24 C19 P1 114.15(10) . . ?
C20 C19 H19 104.9 . . ?
C24 C19 H19 104.9 . . ?
P1 C19 H19 104.9 . . ?
C21 C20 C19 109.87(12) . . ?
C21 C20 H20A 109.7 . . ?
C19 C20 H20A 109.7 . . ?
C21 C20 H20B 109.7 . . ?
C19 C20 H20B 109.7 . . ?
H20A C20 H20B 108.2 . . ?
C22 C21 C20 111.00(12) . . ?
C22 C21 H21A 109.4 . . ?
C20 C21 H21A 109.4 . . ?
C22 C21 H21B 109.4 . . ?
C20 C21 H21B 109.4 . . ?
H21A C21 H21B 108 . . ?
C23 C22 C21 111.36(12) . . ?
C23 C22 H22A 109.4 . . ?
C21 C22 H22A 109.4 . . ?
C23 C22 H22B 109.4 . . ?
C21 C22 H22B 109.4 . . ?
H22A C22 H22B 108 . . ?
C22 C23 C24 111.59(13) . . ?
C22 C23 H23A 109.3 . . ?
C24 C23 H23A 109.3 . . ?
C22 C23 H23B 109.3 . . ?
C24 C23 H23B 109.3 . . ?
H23A C23 H23B 108 . . ?
C23 C24 C19 110.02(12) . . ?
C23 C24 H24A 109.7 . . ?
C19 C24 H24A 109.7 . . ?
C23 C24 H24B 109.7 . . ?
C19 C24 H24B 109.7 . . ?
H24A C24 H24B 108.2 . . ?
 
#===END


data_compound5e
 
_audit_creation_method                  'WinGX routine CIF_UPDATE'
_audit_conform_dict_name                cif_core.dic
_audit_conform_dict_version             2.4
_audit_conform_dict_location            ftp://ftp.iucr.org/pub/cif_core.dic
_publ_requested_category                FM
 
#----------------------------------------------------------------------------#
#                   CHEMICAL INFORMATION                                     #
#----------------------------------------------------------------------------#
 
_chemical_name_systematic
;
 ?
;
_chemical_formula_moiety                'C23 H21 Fe3 O7 P1'
_chemical_formula_sum                   'C23 H21 Fe3 O7 P'
_chemical_formula_weight                607.92
_chemical_compound_source               'synthesis as described'
 
#----------------------------------------------------------------------------#
#                   UNIT CELL INFORMATION                                    #
#----------------------------------------------------------------------------#
 
_symmetry_cell_setting                  monoclinic
_symmetry_space_group_name_H-M          'P 21/c'
_symmetry_space_group_name_Hall         '-P 2ybc'
_symmetry_Int_Tables_number             14
loop_
    _symmetry_equiv_pos_as_xyz
'x, y, z'
'-x, y+1/2, -z+1/2'
'-x, -y, -z'
'x, -y-1/2, z-1/2'
 
_cell_length_a                          11.9840(2)
_cell_length_b                          13.8562(3)
_cell_length_c                          17.5092(4)
_cell_angle_alpha                       90
_cell_angle_beta                        123.3550(10)
_cell_angle_gamma                       90
_cell_volume                            2428.53(9)
_cell_formula_units_Z                   4
_cell_measurement_temperature           295(2)
_cell_measurement_reflns_used           4591
_cell_measurement_theta_min             3.02
_cell_measurement_theta_max             68.28
_cell_measurement_wavelength            1.54184
 
#----------------------------------------------------------------------------#
#                   CRYSTAL INFORMATION                                      #
#----------------------------------------------------------------------------#
 
_exptl_crystal_description              prism
_exptl_crystal_colour                   black
_exptl_crystal_size_max                 0.37
_exptl_crystal_size_mid                 0.25
_exptl_crystal_size_min                 0.1
_exptl_crystal_density_diffrn           1.663
_exptl_crystal_density_method           'not measured'
_exptl_crystal_F_000                    1232
_exptl_special_details
;
 ?
;
 
#----------------------------------------------------------------------------#
#                   ABSORPTION CORRECTION                                    #
#----------------------------------------------------------------------------#
 
_exptl_absorpt_coefficient_mu           15.168
_exptl_absorpt_correction_type          multi-scan
_exptl_absorpt_process_details   
;
 R.H. Blessing, Acta Cryst. (1995), A51, 33-38
; 
_exptl_absorpt_correction_T_min        0.603
_exptl_absorpt_correction_T_max        1.931
 
#----------------------------------------------------------------------------#
#                   DATA COLLECTION                                          #
#----------------------------------------------------------------------------#
 
_diffrn_ambient_temperature             295(2)
_diffrn_radiation_wavelength            1.54184
_diffrn_radiation_type                  CuK\a
_diffrn_radiation_source               'fine-focus sealed tube' 
_diffrn_radiation_monochromator        'horizontally mounted graphite crystal' 
_diffrn_measurement_device_type        'KappaCCD' 
_diffrn_measurement_device             '90 mm CCD camera on \k-goniostat'
_diffrn_measurement_method             'CCD' 
_diffrn_radiation_probe                 x-ray
_diffrn_reflns_av_R_equivalents         0.0891
_diffrn_reflns_av_unetI/netI            0.0639
_diffrn_reflns_number                   17577
_diffrn_reflns_limit_h_min              -14
_diffrn_reflns_limit_h_max              13
_diffrn_reflns_limit_k_min              -16
_diffrn_reflns_limit_k_max              0
_diffrn_reflns_limit_l_min              -21
_diffrn_reflns_limit_l_max              13
_diffrn_reflns_theta_min                4.4
_diffrn_reflns_theta_max                70.06
_diffrn_reflns_theta_full               70.06
_diffrn_measured_fraction_theta_full
                                        0.972
_diffrn_measured_fraction_theta_max
                                        0.972
_reflns_number_total                    4471
_reflns_number_gt                       3510
_reflns_threshold_expression            >2\s(I)
 
#----------------------------------------------------------------------------#
#                   COMPUTER PROGRAMS USED                                   #
#----------------------------------------------------------------------------#
 
_computing_data_collection        'Collect (Bruker AXS BV, 1997-2004)' 
_computing_cell_refinement        'HKL Scalepack (Otwinowski & Minor, 1997)' 
_computing_data_reduction         
;
 HKL Denzo and Scalepack (Otwinowski & Minor, 1997) 
; 
_computing_structure_solution           'SHELXL-97 (Sheldrick, 2008)'
_computing_structure_refinement         'SHELXL-97 (Sheldrick, 2008)'
_computing_molecular_graphics           'Ortep-3 for Windows (Farrugia, 1997)'
_computing_publication_material
                                   'WinGX publication routines (Farrugia, 1999)'
 
#----------------------------------------------------------------------------#
#                   STRUCTURE SOLUTION
#----------------------------------------------------------------------------#
 
_atom_sites_solution_primary            direct
_atom_sites_solution_secondary          difmap
_atom_sites_solution_hydrogens          geom
 
#----------------------------------------------------------------------------#
#                   REFINEMENT INFORMATION                                   #
#----------------------------------------------------------------------------#
 
_refine_special_details
;
 Refinement of F^2^ against ALL reflections.  The weighted R-factor wR and
 goodness of fit S are based on F^2^, conventional R-factors R are based
 on F, with F set to zero for negative F^2^. The threshold expression of
 F^2^ > 2\s(F^2^) is used only for calculating R-factors(gt) etc. and is
 not relevant to the choice of reflections for refinement.  R-factors based
 on F^2^ are statistically about twice as large as those based on F, and R-
 factors based on ALL data will be even larger.
;
_refine_ls_structure_factor_coef        Fsqd
_refine_ls_matrix_type                  full
_refine_ls_weighting_scheme             calc
_refine_ls_weighting_details
         'calc w=1/[\s^2^(Fo^2^)+(0.1183P)^2^+0.0000P] where P=(Fo^2^+2Fc^2^)/3'
_refine_ls_hydrogen_treatment           constr
_refine_ls_extinction_method            none
_refine_ls_number_reflns                4471
_refine_ls_number_parameters            307
_refine_ls_number_restraints            0
_refine_ls_R_factor_all                 0.0721
_refine_ls_R_factor_gt                  0.0604
_refine_ls_wR_factor_ref                0.1656
_refine_ls_wR_factor_gt                 0.1519
_refine_ls_goodness_of_fit_ref          1.024
_refine_ls_restrained_S_all             1.024
_refine_ls_shift/su_max                 0.001
_refine_ls_shift/su_mean                0
_refine_diff_density_max                0.728
_refine_diff_density_min                -1.213
_refine_diff_density_rms                0.156
 
#----------------------------------------------------------------------------#
#                   ATOMIC TYPES, COORDINATES AND THERMAL PARAMETERS         #
#----------------------------------------------------------------------------#
 
loop_
    _atom_type_symbol
    _atom_type_description
    _atom_type_scat_dispersion_real
    _atom_type_scat_dispersion_imag
    _atom_type_scat_source
C C 0.0181 0.0091 'International Tables Vol C Tables 4.2.6.8 and 6.1.1.4'
H H 0 0 'International Tables Vol C Tables 4.2.6.8 and 6.1.1.4'
Fe Fe -1.1336 3.1974 'International Tables Vol C Tables 4.2.6.8 and 6.1.1.4'
O O 0.0492 0.0322 'International Tables Vol C Tables 4.2.6.8 and 6.1.1.4'
P P 0.2955 0.4335 'International Tables Vol C Tables 4.2.6.8 and 6.1.1.4'
 
loop_
    _atom_site_label
    _atom_site_type_symbol
    _atom_site_fract_x
    _atom_site_fract_y
    _atom_site_fract_z
    _atom_site_U_iso_or_equiv
    _atom_site_adp_type
    _atom_site_occupancy
    _atom_site_symmetry_multiplicity
    _atom_site_calc_flag
    _atom_site_refinement_flags
    _atom_site_disorder_assembly
    _atom_site_disorder_group
Fe1 Fe -0.02429(6) 0.30950(5) 0.32204(4) 0.0284(2) Uani 1 1 d . . .
Fe2 Fe 0.35306(6) 0.36781(5) 0.52525(4) 0.0310(2) Uani 1 1 d . . .
Fe3 Fe 0.13528(6) 0.26305(5) 0.27014(4) 0.0303(2) Uani 1 1 d . . .
P1 P 0.19041(10) 0.26417(7) 0.41707(7) 0.0251(3) Uani 1 1 d . . .
O1 O 0.0158(4) 0.4949(3) 0.4105(3) 0.0661(12) Uani 1 1 d . . .
O2 O 0.5445(4) 0.2801(4) 0.4938(3) 0.0624(11) Uani 1 1 d . . .
O3 O 0.2854(4) 0.5161(3) 0.3888(3) 0.0649(12) Uani 1 1 d . . .
O4 O 0.0014(4) 0.4519(3) 0.2082(3) 0.0577(10) Uani 1 1 d . . .
O5 O 0.3613(4) 0.3574(4) 0.2812(3) 0.0737(14) Uani 1 1 d . . .
O6 O 0.2284(5) 0.0632(3) 0.2842(3) 0.0654(12) Uani 1 1 d . . .
O7 O -0.0453(5) 0.2345(4) 0.0722(3) 0.0755(14) Uani 1 1 d . . .
C1 C 0.0078(5) 0.4195(4) 0.3785(3) 0.0405(11) Uani 1 1 d . . .
C2 C 0.4685(4) 0.3120(4) 0.5062(3) 0.0397(11) Uani 1 1 d . . .
C3 C 0.3068(5) 0.4560(4) 0.4395(4) 0.0425(11) Uani 1 1 d . . .
C4 C 0.0330(5) 0.3780(3) 0.2484(3) 0.0378(10) Uani 1 1 d . . .
C5 C 0.2730(5) 0.3217(4) 0.2793(3) 0.0452(12) Uani 1 1 d . . .
C6 C 0.1879(5) 0.1393(4) 0.2817(3) 0.0412(11) Uani 1 1 d . . .
C7 C 0.0254(5) 0.2461(4) 0.1491(4) 0.0458(12) Uani 1 1 d . . .
C8 C -0.2114(7) 0.2813(7) 0.2032(4) 0.080(3) Uani 1 1 d . . .
H8 H -0.2394 0.3067 0.1462 0.096 Uiso 1 1 calc R . .
C9 C -0.1466(8) 0.1959(6) 0.2374(7) 0.083(3) Uani 1 1 d . . .
H9 H -0.1238 0.154 0.2065 0.1 Uiso 1 1 calc R . .
C10 C -0.1199(6) 0.1799(5) 0.3214(6) 0.076(3) Uani 1 1 d . . .
H10 H -0.0769 0.1263 0.3579 0.091 Uiso 1 1 calc R . .
C11 C -0.1695(7) 0.2603(7) 0.3441(5) 0.081(3) Uani 1 1 d . . .
H11 H -0.1646 0.2697 0.3985 0.098 Uiso 1 1 calc R . .
C12 C -0.2286(5) 0.3239(5) 0.2672(6) 0.072(2) Uani 1 1 d . . .
H12 H -0.2704 0.3825 0.2615 0.086 Uiso 1 1 calc R . .
C13 C 0.2819(6) 0.3552(5) 0.6115(4) 0.0540(15) Uani 1 1 d . . .
H13 H 0.2046 0.3227 0.5965 0.065 Uiso 1 1 calc R . .
C14 C 0.4107(6) 0.3142(5) 0.6545(4) 0.0541(14) Uani 1 1 d . . .
H14 H 0.4332 0.2502 0.6724 0.065 Uiso 1 1 calc R . .
C15 C 0.4992(5) 0.3890(5) 0.6654(3) 0.0563(15) Uani 1 1 d . . .
H15 H 0.5908 0.3826 0.6926 0.068 Uiso 1 1 calc R . .
C16 C 0.4255(6) 0.4737(5) 0.6285(4) 0.0578(16) Uani 1 1 d . . .
H16 H 0.459 0.5334 0.626 0.069 Uiso 1 1 calc R . .
C17 C 0.2900(6) 0.4523(5) 0.5952(4) 0.0541(14) Uani 1 1 d . . .
H17 H 0.2192 0.4957 0.5674 0.065 Uiso 1 1 calc R . .
C18 C 0.2164(4) 0.1390(3) 0.4652(3) 0.0333(9) Uani 1 1 d . . .
H18 H 0.1563 0.0975 0.4131 0.04 Uiso 1 1 calc R . .
C19 C 0.1779(5) 0.1239(4) 0.5346(3) 0.0407(11) Uani 1 1 d . . .
H19A H 0.0885 0.1486 0.5097 0.049 Uiso 1 1 calc R . .
H19B H 0.239 0.1595 0.5901 0.049 Uiso 1 1 calc R . .
C20 C 0.1827(6) 0.0161(4) 0.5573(5) 0.0564(15) Uani 1 1 d . . .
H20A H 0.1604 0.008 0.6025 0.068 Uiso 1 1 calc R . .
H20B H 0.1171 -0.0188 0.5026 0.068 Uiso 1 1 calc R . .
C21 C 0.3186(7) -0.0247(5) 0.5936(5) 0.0679(18) Uani 1 1 d . . .
H21A H 0.3179 -0.0933 0.6041 0.081 Uiso 1 1 calc R . .
H21B H 0.3825 0.0055 0.6518 0.081 Uiso 1 1 calc R . .
C22 C 0.3619(7) -0.0085(5) 0.5280(5) 0.0644(17) Uani 1 1 d . . .
H22A H 0.3042 -0.0449 0.4723 0.077 Uiso 1 1 calc R . .
H22B H 0.4525 -0.032 0.5554 0.077 Uiso 1 1 calc R . .
C23 C 0.3561(5) 0.0993(4) 0.5042(4) 0.0412(11) Uani 1 1 d . . .
H23A H 0.42 0.1351 0.5588 0.049 Uiso 1 1 calc R . .
H23B H 0.3799 0.1071 0.4598 0.049 Uiso 1 1 calc R . .
 
loop_
    _atom_site_aniso_label
    _atom_site_aniso_U_11
    _atom_site_aniso_U_22
    _atom_site_aniso_U_33
    _atom_site_aniso_U_23
    _atom_site_aniso_U_13
    _atom_site_aniso_U_12
Fe1 0.0139(3) 0.0302(4) 0.0318(4) 0.0011(2) 0.0067(3) -0.0032(2)
Fe2 0.0161(3) 0.0391(4) 0.0302(4) -0.0048(3) 0.0079(3) -0.0080(3)
Fe3 0.0238(4) 0.0348(4) 0.0294(4) -0.0026(3) 0.0127(3) -0.0068(3)
P1 0.0148(5) 0.0271(5) 0.0275(5) 0.0005(4) 0.0079(4) -0.0024(4)
O1 0.048(2) 0.053(3) 0.072(3) -0.019(2) 0.017(2) 0.0088(19)
O2 0.032(2) 0.091(3) 0.067(3) 0.001(2) 0.030(2) 0.010(2)
O3 0.062(3) 0.051(2) 0.063(2) 0.018(2) 0.023(2) -0.006(2)
O4 0.056(2) 0.051(2) 0.067(2) 0.025(2) 0.034(2) 0.0098(19)
O5 0.061(3) 0.106(4) 0.067(3) -0.024(3) 0.043(2) -0.050(3)
O6 0.078(3) 0.047(2) 0.073(3) -0.0058(19) 0.042(3) 0.013(2)
O7 0.058(3) 0.112(4) 0.033(2) -0.012(2) 0.010(2) -0.015(3)
C1 0.025(2) 0.039(3) 0.046(3) 0.001(2) 0.013(2) 0.000(2)
C2 0.020(2) 0.056(3) 0.032(2) 0.002(2) 0.0072(19) -0.007(2)
C3 0.025(2) 0.040(3) 0.055(3) -0.006(2) 0.017(2) -0.010(2)
C4 0.029(2) 0.037(3) 0.036(2) 0.0045(19) 0.011(2) -0.005(2)
C5 0.035(3) 0.061(3) 0.035(2) -0.008(2) 0.017(2) -0.009(2)
C6 0.040(3) 0.047(3) 0.039(2) -0.008(2) 0.023(2) -0.005(2)
C7 0.041(3) 0.057(3) 0.042(3) -0.004(2) 0.025(2) -0.006(2)
C8 0.042(4) 0.125(7) 0.039(3) 0.002(4) 0.000(3) -0.053(4)
C9 0.066(5) 0.074(5) 0.128(7) -0.053(5) 0.064(5) -0.054(4)
C10 0.023(3) 0.055(4) 0.119(6) 0.031(4) 0.018(3) -0.014(3)
C11 0.043(4) 0.149(8) 0.054(4) -0.019(4) 0.028(3) -0.051(5)
C12 0.016(2) 0.055(4) 0.120(6) 0.005(4) 0.021(3) 0.000(2)
C13 0.045(3) 0.077(4) 0.052(3) -0.023(3) 0.034(3) -0.024(3)
C14 0.056(3) 0.067(4) 0.036(3) 0.002(2) 0.023(3) -0.003(3)
C15 0.025(2) 0.094(5) 0.032(2) -0.009(3) 0.005(2) -0.003(3)
C16 0.048(3) 0.066(4) 0.052(3) -0.029(3) 0.024(3) -0.033(3)
C17 0.041(3) 0.065(4) 0.050(3) -0.023(3) 0.022(3) -0.003(3)
C18 0.028(2) 0.033(2) 0.036(2) 0.0073(18) 0.0158(19) 0.0035(18)
C19 0.037(3) 0.045(3) 0.045(3) 0.008(2) 0.025(2) 0.000(2)
C20 0.063(4) 0.045(3) 0.072(4) 0.017(3) 0.044(3) -0.003(3)
C21 0.073(4) 0.054(4) 0.072(4) 0.031(3) 0.037(4) 0.013(3)
C22 0.061(4) 0.048(3) 0.091(5) 0.026(3) 0.046(4) 0.026(3)
C23 0.029(2) 0.041(3) 0.052(3) 0.012(2) 0.022(2) 0.013(2)
 
 
#----------------------------------------------------------------------------#
#                   MOLECULAR GEOMETRY                                       #
#----------------------------------------------------------------------------#
 
_geom_special_details
;
 All s.u.'s (except the s.u. in the dihedral angle between two l.s. planes)
 are estimated using the full covariance matrix.  The cell s.u.'s are taken
 into account individually in the estimation of s.u.'s in distances, angles
 and torsion angles; correlations between s.u.'s in cell parameters are only
 used when they are defined by crystal symmetry.  An approximate (isotropic)
 treatment of cell s.u.'s is used for estimating s.u.'s involving l.s. planes.
;
loop_
    _geom_bond_atom_site_label_1
    _geom_bond_atom_site_label_2
    _geom_bond_distance
    _geom_bond_site_symmetry_2
    _geom_bond_publ_flag
Fe1 C1 1.741(5) . ?
Fe1 C4 2.002(5) . ?
Fe1 C12 2.090(5) . ?
Fe1 C8 2.093(5) . ?
Fe1 C11 2.094(6) . ?
Fe1 C9 2.106(6) . ?
Fe1 C10 2.127(6) . ?
Fe1 P1 2.2528(11) . ?
Fe1 Fe3 2.6092(9) . ?
Fe2 C2 1.769(5) . ?
Fe2 C3 1.772(6) . ?
Fe2 C14 2.106(5) . ?
Fe2 C16 2.109(5) . ?
Fe2 C15 2.110(5) . ?
Fe2 C13 2.110(5) . ?
Fe2 C17 2.111(5) . ?
Fe2 P1 2.3215(11) . ?
Fe3 C5 1.766(5) . ?
Fe3 C7 1.793(5) . ?
Fe3 C6 1.800(5) . ?
Fe3 C4 1.916(5) . ?
Fe3 P1 2.2774(12) . ?
P1 C18 1.877(4) . ?
O1 C1 1.164(6) . ?
O2 C2 1.135(6) . ?
O3 C3 1.138(6) . ?
O4 C4 1.181(6) . ?
O5 C5 1.152(6) . ?
O6 C6 1.151(6) . ?
O7 C7 1.141(6) . ?
C8 C9 1.360(12) . ?
C8 C12 1.379(11) . ?
C8 H8 0.93 . ?
C9 C10 1.341(12) . ?
C9 H9 0.93 . ?
C10 C11 1.418(11) . ?
C10 H10 0.93 . ?
C11 C12 1.429(11) . ?
C11 H11 0.93 . ?
C12 H12 0.93 . ?
C13 C17 1.389(9) . ?
C13 C14 1.412(8) . ?
C13 H13 0.93 . ?
C14 C15 1.418(9) . ?
C14 H14 0.93 . ?
C15 C16 1.396(9) . ?
C15 H15 0.93 . ?
C16 C17 1.422(8) . ?
C16 H16 0.93 . ?
C17 H17 0.93 . ?
C18 C23 1.522(6) . ?
C18 C19 1.533(6) . ?
C18 H18 0.98 . ?
C19 C20 1.540(7) . ?
C19 H19A 0.97 . ?
C19 H19B 0.97 . ?
C20 C21 1.495(9) . ?
C20 H20A 0.97 . ?
C20 H20B 0.97 . ?
C21 C22 1.517(9) . ?
C21 H21A 0.97 . ?
C21 H21B 0.97 . ?
C22 C23 1.541(7) . ?
C22 H22A 0.97 . ?
C22 H22B 0.97 . ?
C23 H23A 0.97 . ?
C23 H23B 0.97 . ?
 
loop_
    _geom_angle_atom_site_label_1
    _geom_angle_atom_site_label_2
    _geom_angle_atom_site_label_3
    _geom_angle
    _geom_angle_site_symmetry_1
    _geom_angle_site_symmetry_3
    _geom_angle_publ_flag
C1 Fe1 C4 84.5(2) . . ?
C1 Fe1 C12 90.8(3) . . ?
C4 Fe1 C12 112.9(3) . . ?
C1 Fe1 C8 120.6(3) . . ?
C4 Fe1 C8 90.4(2) . . ?
C12 Fe1 C8 38.5(3) . . ?
C1 Fe1 C11 97.3(3) . . ?
C4 Fe1 C11 152.6(3) . . ?
C12 Fe1 C11 39.9(3) . . ?
C8 Fe1 C11 65.0(3) . . ?
C1 Fe1 C9 154.9(3) . . ?
C4 Fe1 C9 104.7(3) . . ?
C12 Fe1 C9 64.0(3) . . ?
C8 Fe1 C9 37.8(3) . . ?
C11 Fe1 C9 63.8(3) . . ?
C1 Fe1 C10 133.8(3) . . ?
C4 Fe1 C10 140.5(3) . . ?
C12 Fe1 C10 65.6(3) . . ?
C8 Fe1 C10 63.7(3) . . ?
C11 Fe1 C10 39.3(3) . . ?
C9 Fe1 C10 37.0(3) . . ?
C1 Fe1 P1 91.06(16) . . ?
C4 Fe1 P1 87.19(14) . . ?
C12 Fe1 P1 159.9(2) . . ?
C8 Fe1 P1 147.8(3) . . ?
C11 Fe1 P1 120.0(2) . . ?
C9 Fe1 P1 112.4(3) . . ?
C10 Fe1 P1 99.31(17) . . ?
C1 Fe1 Fe3 116.01(17) . . ?
C4 Fe1 Fe3 46.85(14) . . ?
C12 Fe1 Fe3 139.6(3) . . ?
C8 Fe1 Fe3 101.4(3) . . ?
C11 Fe1 Fe3 145.8(3) . . ?
C9 Fe1 Fe3 86.0(2) . . ?
C10 Fe1 Fe3 106.6(3) . . ?
P1 Fe1 Fe3 55.28(3) . . ?
C2 Fe2 C3 93.1(2) . . ?
C2 Fe2 C14 102.7(2) . . ?
C3 Fe2 C14 156.8(2) . . ?
C2 Fe2 C16 118.0(2) . . ?
C3 Fe2 C16 92.0(3) . . ?
C14 Fe2 C16 65.6(2) . . ?
C2 Fe2 C15 92.6(2) . . ?
C3 Fe2 C15 124.2(3) . . ?
C14 Fe2 C15 39.3(2) . . ?
C16 Fe2 C15 38.7(2) . . ?
C2 Fe2 C13 139.8(3) . . ?
C3 Fe2 C13 127.0(3) . . ?
C14 Fe2 C13 39.1(2) . . ?
C16 Fe2 C13 65.3(2) . . ?
C15 Fe2 C13 65.3(2) . . ?
C2 Fe2 C17 156.6(2) . . ?
C3 Fe2 C17 93.7(3) . . ?
C14 Fe2 C17 65.3(3) . . ?
C16 Fe2 C17 39.4(2) . . ?
C15 Fe2 C17 65.2(2) . . ?
C13 Fe2 C17 38.4(2) . . ?
C2 Fe2 P1 88.21(16) . . ?
C3 Fe2 P1 90.24(16) . . ?
C14 Fe2 P1 106.92(17) . . ?
C16 Fe2 P1 153.50(17) . . ?
C15 Fe2 P1 145.4(2) . . ?
C13 Fe2 P1 92.55(15) . . ?
C17 Fe2 P1 114.12(16) . . ?
C5 Fe3 C7 102.1(2) . . ?
C5 Fe3 C6 100.1(3) . . ?
C7 Fe3 C6 89.6(2) . . ?
C5 Fe3 C4 95.7(2) . . ?
C7 Fe3 C4 84.3(2) . . ?
C6 Fe3 C4 163.9(2) . . ?
C5 Fe3 P1 102.58(16) . . ?
C7 Fe3 P1 154.83(17) . . ?
C6 Fe3 P1 90.75(15) . . ?
C4 Fe3 P1 88.56(14) . . ?
C5 Fe3 Fe1 133.01(18) . . ?
C7 Fe3 Fe1 104.00(17) . . ?
C6 Fe3 Fe1 118.31(16) . . ?
C4 Fe3 Fe1 49.66(14) . . ?
P1 Fe3 Fe1 54.39(3) . . ?
C18 P1 Fe1 115.42(15) . . ?
C18 P1 Fe3 111.97(15) . . ?
Fe1 P1 Fe3 70.33(4) . . ?
C18 P1 Fe2 110.33(15) . . ?
Fe1 P1 Fe2 122.40(5) . . ?
Fe3 P1 Fe2 121.19(5) . . ?
O1 C1 Fe1 173.2(4) . . ?
O2 C2 Fe2 177.0(5) . . ?
O3 C3 Fe2 175.0(5) . . ?
O4 C4 Fe3 143.1(4) . . ?
O4 C4 Fe1 133.1(4) . . ?
Fe3 C4 Fe1 83.49(18) . . ?
O5 C5 Fe3 176.4(5) . . ?
O6 C6 Fe3 172.3(5) . . ?
O7 C7 Fe3 179.2(6) . . ?
C9 C8 C12 108.6(7) . . ?
C9 C8 Fe1 71.6(4) . . ?
C12 C8 Fe1 70.7(3) . . ?
C9 C8 H8 125.7 . . ?
C12 C8 H8 125.7 . . ?
Fe1 C8 H8 123.6 . . ?
C10 C9 C8 111.1(7) . . ?
C10 C9 Fe1 72.4(4) . . ?
C8 C9 Fe1 70.6(4) . . ?
C10 C9 H9 124.5 . . ?
C8 C9 H9 124.5 . . ?
Fe1 C9 H9 124.2 . . ?
C9 C10 C11 107.1(6) . . ?
C9 C10 Fe1 70.7(4) . . ?
C11 C10 Fe1 69.1(4) . . ?
C9 C10 H10 126.4 . . ?
C11 C10 H10 126.4 . . ?
Fe1 C10 H10 125.3 . . ?
C10 C11 C12 106.7(7) . . ?
C10 C11 Fe1 71.6(4) . . ?
C12 C11 Fe1 69.9(3) . . ?
C10 C11 H11 126.7 . . ?
C12 C11 H11 126.7 . . ?
Fe1 C11 H11 123.5 . . ?
C8 C12 C11 106.5(7) . . ?
C8 C12 Fe1 70.9(4) . . ?
C11 C12 Fe1 70.2(3) . . ?
C8 C12 H12 126.7 . . ?
C11 C12 H12 126.7 . . ?
Fe1 C12 H12 123.9 . . ?
C17 C13 C14 108.7(5) . . ?
C17 C13 Fe2 70.8(3) . . ?
C14 C13 Fe2 70.3(3) . . ?
C17 C13 H13 125.7 . . ?
C14 C13 H13 125.7 . . ?
Fe2 C13 H13 124.8 . . ?
C13 C14 C15 107.2(5) . . ?
C13 C14 Fe2 70.6(3) . . ?
C15 C14 Fe2 70.5(3) . . ?
C13 C14 H14 126.4 . . ?
C15 C14 H14 126.4 . . ?
Fe2 C14 H14 124.1 . . ?
C16 C15 C14 108.4(5) . . ?
C16 C15 Fe2 70.6(3) . . ?
C14 C15 Fe2 70.2(3) . . ?
C16 C15 H15 125.8 . . ?
C14 C15 H15 125.8 . . ?
Fe2 C15 H15 125 . . ?
C15 C16 C17 107.7(5) . . ?
C15 C16 Fe2 70.7(3) . . ?
C17 C16 Fe2 70.4(3) . . ?
C15 C16 H16 126.2 . . ?
C17 C16 H16 126.2 . . ?
Fe2 C16 H16 124.3 . . ?
C13 C17 C16 108.1(6) . . ?
C13 C17 Fe2 70.7(3) . . ?
C16 C17 Fe2 70.2(3) . . ?
C13 C17 H17 126 . . ?
C16 C17 H17 126 . . ?
Fe2 C17 H17 124.7 . . ?
C23 C18 C19 109.3(4) . . ?
C23 C18 P1 114.0(3) . . ?
C19 C18 P1 115.7(3) . . ?
C23 C18 H18 105.6 . . ?
C19 C18 H18 105.6 . . ?
P1 C18 H18 105.6 . . ?
C18 C19 C20 110.6(4) . . ?
C18 C19 H19A 109.5 . . ?
C20 C19 H19A 109.5 . . ?
C18 C19 H19B 109.5 . . ?
C20 C19 H19B 109.5 . . ?
H19A C19 H19B 108.1 . . ?
C21 C20 C19 110.7(5) . . ?
C21 C20 H20A 109.5 . . ?
C19 C20 H20A 109.5 . . ?
C21 C20 H20B 109.5 . . ?
C19 C20 H20B 109.5 . . ?
H20A C20 H20B 108.1 . . ?
C20 C21 C22 111.6(5) . . ?
C20 C21 H21A 109.3 . . ?
C22 C21 H21A 109.3 . . ?
C20 C21 H21B 109.3 . . ?
C22 C21 H21B 109.3 . . ?
H21A C21 H21B 108 . . ?
C21 C22 C23 111.4(5) . . ?
C21 C22 H22A 109.4 . . ?
C23 C22 H22A 109.4 . . ?
C21 C22 H22B 109.4 . . ?
C23 C22 H22B 109.4 . . ?
H22A C22 H22B 108 . . ?
C18 C23 C22 110.3(4) . . ?
C18 C23 H23A 109.6 . . ?
C22 C23 H23A 109.6 . . ?
C18 C23 H23B 109.6 . . ?
C22 C23 H23B 109.6 . . ?
H23A C23 H23B 108.1 . . ?
 
 
#===END

data_compound7

_audit_creation_method                  'WinGX routine CIF_UPDATE'
_audit_conform_dict_name                cif_core.dic
_audit_conform_dict_version             2.3
_audit_conform_dict_location            ftp://ftp.iucr.org/pub/cif_core.dic
_publ_requested_category                FM
 
#----------------------------------------------------------------------------#
#                   CHEMICAL INFORMATION                                     #
#----------------------------------------------------------------------------#
 
_chemical_name_systematic
;
 ?
;
_chemical_formula_moiety                'C25 H28 Fe2 Mn1 O3 P1'
_chemical_formula_sum                   'C25 H28 Fe2 Mn O3 P'
_chemical_formula_weight                574.08
_chemical_compound_source               'synthesis as described'
 
#----------------------------------------------------------------------------#
#                   UNIT CELL INFORMATION                                    #
#----------------------------------------------------------------------------#
 
_symmetry_cell_setting                  orthorhombic
_symmetry_space_group_name_H-M          'P n m a'
_symmetry_space_group_name_Hall         '-P 2ac 2n'
_symmetry_Int_Tables_number             62
loop_
    _symmetry_equiv_pos_as_xyz
'x, y, z'
'-x+1/2, y+1/2, z+1/2'
'x, -y+1/2, z'
'-x+1/2, -y, z+1/2'
'-x, -y, -z'
'x-1/2, -y-1/2, -z-1/2'
'-x, y-1/2, -z'
'x-1/2, y, -z-1/2'
 
_cell_length_a                          14.0485(2)
_cell_length_b                          12.4050(2)
_cell_length_c                          13.3384(3)
_cell_angle_alpha                       90
_cell_angle_beta                        90
_cell_angle_gamma                       90
_cell_volume                            2324.50(7)
_cell_formula_units_Z                   4
_cell_measurement_temperature           120(2)
_cell_measurement_reflns_used           2300
_cell_measurement_theta_min             2.209
_cell_measurement_theta_max             68.251
_cell_measurement_wavelength            1.54184
 
#----------------------------------------------------------------------------#
#                   CRYSTAL INFORMATION                                      #
#----------------------------------------------------------------------------#
 
_exptl_crystal_description              prism
_exptl_crystal_colour                   brown
_exptl_crystal_size_max                 0.25
_exptl_crystal_size_mid                 0.19
_exptl_crystal_size_min                 0.17
_exptl_crystal_density_diffrn           1.64
_exptl_crystal_density_method           'not measured'
_exptl_crystal_F_000                    1176
_exptl_special_details
;
 ?
;
 
#----------------------------------------------------------------------------#
#                   ABSORPTION CORRECTION                                    #
#----------------------------------------------------------------------------#
 
_exptl_absorpt_coefficient_mu           15.084
_exptl_absorpt_correction_type          multi-scan
_exptl_absorpt_process_details
;
 R.H. Blessing, Acta Cryst. (1995), A51, 33-38
;
_exptl_absorpt_correction_T_min         0.826
_exptl_absorpt_correction_T_max         1.339

 
#----------------------------------------------------------------------------#
#                   DATA COLLECTION                                          #
#----------------------------------------------------------------------------#
 
_diffrn_ambient_temperature             120(2)
_diffrn_radiation_wavelength            1.54184
_diffrn_measurement_device_type         'KappaCCD'
_diffrn_detector_area_resol_mean        9
_computing_data_collection             'Collect (Bruker AXS BV, 1997-2004)'
_diffrn_measurement_method              'CCD'
_diffrn_radiation_type                  CuK\a
_diffrn_radiation_monochromator         graphite
_diffrn_radiation_probe                 x-ray
_diffrn_reflns_av_R_equivalents         0.0618
_diffrn_reflns_av_unetI/netI            0.0411
_diffrn_reflns_number                   14856
_diffrn_reflns_limit_h_min              0
_diffrn_reflns_limit_h_max              16
_diffrn_reflns_limit_k_min              0
_diffrn_reflns_limit_k_max              14
_diffrn_reflns_limit_l_min              0
_diffrn_reflns_limit_l_max              15
_diffrn_reflns_theta_min                4.57
_diffrn_reflns_theta_max                67.5
_diffrn_reflns_theta_full               67.5
_diffrn_measured_fraction_theta_full
                                        0.967
_diffrn_measured_fraction_theta_max
                                        0.967
_reflns_number_total                    2125
_reflns_number_gt                       1870
_reflns_threshold_expression            >2sigma(I)
 
#----------------------------------------------------------------------------#
#                   COMPUTER PROGRAMS USED                                   #
#----------------------------------------------------------------------------#
 
_computing_data_reduction         
;
 HKL Denzo and Scalepack (Otwinowski & Minor, 1997) 
;
_computing_structure_solution           'SHELXL-97 (Sheldrick, 1997)'
_computing_structure_refinement         'SHELXL-97 (Sheldrick, 1997)'
_computing_molecular_graphics           'Ortep-3 for Windows (Farrugia, 1997)'
_computing_publication_material
                                   'WinGX publication routines (Farrugia, 1999)'
 
#----------------------------------------------------------------------------#
#                   REFINEMENT INFORMATION                                   #
#----------------------------------------------------------------------------#
 
_refine_special_details
;
 Refinement of F^2^ against ALL reflections.  The weighted R-factor wR and
 goodness of fit S are based on F^2^, conventional R-factors R are based
 on F, with F set to zero for negative F^2^. The threshold expression of
 F^2^ > 2sigma(F^2^) is used only for calculating R-factors(gt) etc. and is
 not relevant to the choice of reflections for refinement.  R-factors based
 on F^2^ are statistically about twice as large as those based on F, and R-
 factors based on ALL data will be even larger.
;
_refine_ls_structure_factor_coef        Fsqd
_refine_ls_matrix_type                  full
_refine_ls_weighting_scheme             calc
_refine_ls_weighting_details
         'calc w=1/[\s^2^(Fo^2^)+(0.0507P)^2^+2.7246P] where P=(Fo^2^+2Fc^2^)/3'
_atom_sites_solution_primary            direct
_atom_sites_solution_secondary          difmap
_atom_sites_solution_hydrogens          geom
_refine_ls_hydrogen_treatment           constr
_refine_ls_extinction_method            none
_refine_ls_number_reflns                2125
_refine_ls_number_parameters            205
_refine_ls_number_restraints            0
_refine_ls_R_factor_all                 0.0409
_refine_ls_R_factor_gt                  0.035
_refine_ls_wR_factor_ref                0.0939
_refine_ls_wR_factor_gt                 0.087
_refine_ls_goodness_of_fit_ref          1.054
_refine_ls_restrained_S_all             1.054
_refine_ls_shift/su_max                 0.001
_refine_ls_shift/su_mean                0
_refine_diff_density_max                0.443
_refine_diff_density_min                -0.525
_refine_diff_density_rms                0.092
 
#----------------------------------------------------------------------------#
#                   ATOMIC TYPES, COORDINATES AND THERMAL PARAMETERS         #
#----------------------------------------------------------------------------#
 
loop_
    _atom_type_symbol
    _atom_type_description
    _atom_type_scat_dispersion_real
    _atom_type_scat_dispersion_imag
    _atom_type_scat_source
C C 0.0181 0.0091 'International Tables Vol C Tables 4.2.6.8 and 6.1.1.4'
H H 0 0 'International Tables Vol C Tables 4.2.6.8 and 6.1.1.4'
Fe Fe -1.1336 3.1974 'International Tables Vol C Tables 4.2.6.8 and 6.1.1.4'
Mn Mn -0.5299 2.8052 'International Tables Vol C Tables 4.2.6.8 and 6.1.1.4'
O O 0.0492 0.0322 'International Tables Vol C Tables 4.2.6.8 and 6.1.1.4'
P P 0.2955 0.4335 'International Tables Vol C Tables 4.2.6.8 and 6.1.1.4'
 
loop_
    _atom_site_label
    _atom_site_type_symbol
    _atom_site_fract_x
    _atom_site_fract_y
    _atom_site_fract_z
    _atom_site_U_iso_or_equiv
    _atom_site_adp_type
    _atom_site_occupancy
    _atom_site_symmetry_multiplicity
    _atom_site_calc_flag
    _atom_site_refinement_flags
    _atom_site_disorder_assembly
    _atom_site_disorder_group
Fe1 Fe 0.12895(4) 0.75 0.50196(4) 0.00891(18) Uani 1 2 d S . .
P1 P 0.26668(6) 0.75 0.57027(6) 0.0084(2) Uani 1 2 d S . .
C1 C 0.0645(2) 0.6466(2) 0.5930(2) 0.0192(6) Uani 1 1 d . . .
O1 O -0.01249(14) 0.60774(17) 0.59527(18) 0.0284(5) Uani 1 1 d . . .
C2 C 0.1171(3) 0.75 0.7446(3) 0.0333(12) Uani 1 2 d S . .
O2 O 0.0658(3) 0.75 0.8135(3) 0.0747(17) Uani 1 2 d S . .
C11 C 0.0172(3) 0.75 0.3993(3) 0.0201(9) Uani 1 2 d S . .
H11 H -0.0468 0.75 0.4169 0.024 Uiso 1 2 calc SR . .
C12 C 0.0748(2) 0.8423(2) 0.3835(2) 0.0217(6) Uani 1 1 d . . .
H12 H 0.0553 0.9136 0.3895 0.026 Uiso 1 1 calc R . .
C13 C 0.1670(2) 0.8069(3) 0.3571(2) 0.0213(6) Uani 1 1 d . . .
H13 H 0.2187 0.8509 0.3423 0.026 Uiso 1 1 calc R . .
Mn1 Mn 0.1849(6) 0.6521(6) 0.6714(5) 0.0161(9) Uani 0.5 1 d P . 1
C21 C 0.3066(5) 0.5735(8) 0.7322(6) 0.023(2) Uani 0.5 1 d P . 1
H21 H 0.3695 0.5965 0.7285 0.028 Uiso 0.5 1 calc PR . 1
C22 C 0.2628(5) 0.5060(6) 0.6619(7) 0.0192(17) Uani 0.5 1 d P . 1
H22 H 0.2907 0.4781 0.6042 0.023 Uiso 0.5 1 calc PR . 1
C25 C 0.2452(10) 0.6009(10) 0.8064(9) 0.037(3) Uani 0.5 1 d P . 1
C24 C 0.1588(12) 0.5442(11) 0.7886(10) 0.044(3) Uani 0.5 1 d P . 1
H24 H 0.1062 0.5442 0.8308 0.053 Uiso 0.5 1 calc PR . 1
C23 C 0.1655(11) 0.4874(10) 0.6957(11) 0.038(5) Uani 0.5 1 d P . 1
H23 H 0.1184 0.4474 0.6639 0.045 Uiso 0.5 1 calc PR . 1
C26 C 0.2663(7) 0.6523(13) 0.8974(7) 0.108(5) Uani 0.5 1 d P . 1
H26A H 0.2768 0.5991 0.9484 0.162 Uiso 0.5 1 calc PR . 1
H26B H 0.2139 0.6976 0.9164 0.162 Uiso 0.5 1 calc PR . 1
H26C H 0.3225 0.6954 0.8896 0.162 Uiso 0.5 1 calc PR . 1
Fe2 Fe 0.1818(5) 0.6355(6) 0.6524(5) 0.0142(8) Uani 0.5 1 d P . 2
C31 C 0.1464(10) 0.5054(13) 0.7455(12) 0.039(5) Uani 0.5 1 d P . 2
H31 H 0.088 0.5004 0.7782 0.046 Uiso 0.5 1 calc PR . 2
C32 C 0.1645(6) 0.4647(7) 0.6458(9) 0.028(2) Uani 0.5 1 d P . 2
H32 H 0.1216 0.4295 0.604 0.033 Uiso 0.5 1 calc PR . 2
C33 C 0.2600(5) 0.4889(6) 0.6248(6) 0.0111(18) Uiso 0.5 1 d P . 2
H33 H 0.2918 0.4716 0.5658 0.013 Uiso 0.5 1 calc PR . 2
C34 C 0.3005(8) 0.5441(8) 0.7076(9) 0.021(3) Uiso 0.5 1 d P . 2
H34 H 0.3625 0.57 0.7113 0.025 Uiso 0.5 1 calc PR . 2
C35 C 0.2279(11) 0.5534(10) 0.7868(9) 0.037(3) Uani 0.5 1 d P . 2
H35 H 0.2345 0.5843 0.85 0.044 Uiso 0.5 1 calc PR . 2
C41 C 0.3908(3) 0.75 0.5263(3) 0.0122(7) Uani 1 2 d S . .
H41 H 0.4316 0.75 0.586 0.015 Uiso 1 2 calc SR . .
C42 C 0.4148(2) 0.8500(3) 0.4670(3) 0.0419(10) Uani 1 1 d . . .
H42A H 0.4016 0.9134 0.5073 0.05 Uiso 1 1 calc R . .
H42B H 0.3751 0.8532 0.4076 0.05 Uiso 1 1 calc R . .
C43 C 0.5197(2) 0.8503(3) 0.4359(3) 0.0446(10) Uani 1 1 d . . .
H43A H 0.5322 0.9132 0.3947 0.054 Uiso 1 1 calc R . .
H43B H 0.5592 0.8553 0.4953 0.054 Uiso 1 1 calc R . .
C44 C 0.5460(3) 0.75 0.3781(4) 0.0440(15) Uani 1 2 d S . .
H44A H 0.614 0.75 0.365 0.053 Uiso 1 2 calc SR . .
H44B H 0.5132 0.75 0.3141 0.053 Uiso 1 2 calc SR . .
 
loop_
    _atom_site_aniso_label
    _atom_site_aniso_U_11
    _atom_site_aniso_U_22
    _atom_site_aniso_U_33
    _atom_site_aniso_U_23
    _atom_site_aniso_U_13
    _atom_site_aniso_U_12
Fe1 0.0013(3) 0.0118(3) 0.0136(3) 0 -0.0012(2) 0
P1 0.0014(4) 0.0151(5) 0.0087(4) 0 0.0014(3) 0
C1 0.0114(15) 0.0127(14) 0.0334(16) 0.0055(12) 0.0064(12) 0.0020(10)
O1 0.0096(11) 0.0228(11) 0.0527(15) 0.0089(10) 0.0055(10) -0.0057(8)
C2 0.010(2) 0.067(4) 0.022(2) 0 0.0024(18) 0
O2 0.022(2) 0.176(5) 0.0267(19) 0 0.0225(17) 0
C11 0.008(2) 0.029(2) 0.024(2) 0 -0.0103(16) 0
C12 0.0227(16) 0.0196(15) 0.0230(15) 0.0078(12) -0.0096(13) 0.0025(12)
C13 0.0160(15) 0.0339(17) 0.0139(13) 0.0072(12) -0.0045(11) -0.0081(13)
Mn1 0.0092(8) 0.0298(19) 0.0093(19) 0.0079(11) -0.0001(11) -0.0062(10)
C21 0.025(4) 0.025(4) 0.019(4) 0.002(4) -0.016(3) 0.007(3)
C22 0.037(5) 0.016(3) 0.005(3) -0.003(3) 0.000(3) 0.003(3)
C25 0.028(5) 0.054(8) 0.028(5) 0.024(5) -0.004(4) -0.004(6)
C24 0.036(7) 0.062(8) 0.034(8) 0.035(6) 0.009(6) -0.003(6)
C23 0.053(9) 0.022(6) 0.037(10) 0.022(7) -0.039(8) -0.014(6)
C26 0.044(6) 0.250(17) 0.030(5) 0.029(7) -0.008(4) 0.057(8)
Fe2 0.0026(10) 0.0271(19) 0.013(2) 0.0119(13) 0.0031(12) 0.0022(11)
C31 0.024(5) 0.052(10) 0.040(12) 0.039(9) 0.000(7) 0.002(6)
C32 0.013(4) 0.017(4) 0.052(7) 0.018(5) -0.004(4) 0.000(3)
C35 0.035(8) 0.050(7) 0.026(6) 0.028(5) 0.008(5) 0.010(6)
C41 0.0032(18) 0.022(2) 0.0112(17) 0 -0.0013(14) 0
C42 0.0152(18) 0.036(2) 0.074(3) 0.0261(19) 0.0174(18) 0.0035(14)
C43 0.0113(17) 0.056(2) 0.066(3) 0.034(2) 0.0148(17) -0.0018(15)
C44 0.011(2) 0.102(5) 0.019(2) 0 0.0077(18) 0
 
 
#----------------------------------------------------------------------------#
#                   MOLECULAR GEOMETRY                                       #
#----------------------------------------------------------------------------#
 
_geom_special_details
;
 All esds (except the esd in the dihedral angle between two l.s. planes)
 are estimated using the full covariance matrix.  The cell esds are taken
 into account individually in the estimation of esds in distances, angles
 and torsion angles; correlations between esds in cell parameters are only
 used when they are defined by crystal symmetry.  An approximate (isotropic)
 treatment of cell esds is used for estimating esds involving l.s. planes.
;
loop_
    _geom_bond_atom_site_label_1
    _geom_bond_atom_site_label_2
    _geom_bond_distance
    _geom_bond_site_symmetry_2
    _geom_bond_publ_flag
Fe1 C1 1.985(3) . ?
Fe1 C1 1.985(3) 3_565 ?
Fe1 C11 2.083(4) . ?
Fe1 C12 2.094(3) 3_565 ?
Fe1 C12 2.094(3) . ?
Fe1 C13 2.125(3) 3_565 ?
Fe1 C13 2.125(3) . ?
Fe1 P1 2.1387(10) . ?
Fe1 Fe2 2.568(7) 3_565 ?
Fe1 Fe2 2.568(7) . ?
Fe1 Mn1 2.684(8) 3_565 ?
Fe1 Mn1 2.684(8) . ?
P1 C41 1.840(4) . ?
P1 Mn1 2.149(9) . ?
P1 Mn1 2.149(9) 3_565 ?
P1 Fe2 2.153(8) . ?
P1 Fe2 2.153(8) 3_565 ?
C1 O1 1.184(3) . ?
C1 Fe2 1.835(7) . ?
C1 Mn1 1.990(8) . ?
C2 O2 1.168(6) . ?
C2 Mn1 1.826(7) 3_565 ?
C2 Mn1 1.826(7) . ?
C2 Fe2 2.087(7) . ?
C2 Fe2 2.087(7) 3_565 ?
C11 C12 1.417(4) . ?
C11 C12 1.417(4) 3_565 ?
C11 H11 0.93 . ?
C12 C13 1.412(4) . ?
C12 H12 0.93 . ?
C13 C13 1.411(7) 3_565 ?
C13 H13 0.93 . ?
Mn1 C23 2.086(14) . ?
Mn1 C25 2.089(14) . ?
Mn1 C24 2.089(15) . ?
Mn1 C22 2.121(10) . ?
Mn1 C21 2.129(10) . ?
Mn1 Mn1 2.430(16) 3_565 ?
C21 C25 1.356(16) . ?
C21 C22 1.399(12) . ?
C21 H21 0.93 . ?
C22 C23 1.457(17) . ?
C22 H22 0.93 . ?
C25 C26 1.402(17) . ?
C25 C24 1.422(17) . ?
C24 C23 1.428(18) . ?
C24 H24 0.93 . ?
C23 H23 0.93 . ?
C26 H26A 0.96 . ?
C26 H26B 0.96 . ?
C26 H26C 0.96 . ?
Fe2 C31 2.097(15) . ?
Fe2 C32 2.135(12) . ?
Fe2 C34 2.147(13) . ?
Fe2 C33 2.156(10) . ?
Fe2 C35 2.161(14) . ?
Fe2 Fe2 2.840(14) 3_565 ?
C31 C35 1.40(2) . ?
C31 C32 1.445(18) . ?
C31 H31 0.93 . ?
C32 C33 1.403(11) . ?
C32 H32 0.93 . ?
C33 C34 1.418(12) . ?
C33 H33 0.93 . ?
C34 C35 1.474(17) . ?
C34 H34 0.93 . ?
C35 H35 0.93 . ?
C41 C42 1.510(4) 3_565 ?
C41 C42 1.510(4) . ?
C41 H41 0.98 . ?
C42 C43 1.531(5) . ?
C42 H42A 0.97 . ?
C42 H42B 0.97 . ?
C43 C44 1.510(5) . ?
C43 H43A 0.97 . ?
C43 H43B 0.97 . ?
C44 C43 1.510(5) 3_565 ?
C44 H44A 0.97 . ?
C44 H44B 0.97 . ?
 
loop_
    _geom_angle_atom_site_label_1
    _geom_angle_atom_site_label_2
    _geom_angle_atom_site_label_3
    _geom_angle
    _geom_angle_site_symmetry_1
    _geom_angle_site_symmetry_3
    _geom_angle_publ_flag
C1 Fe1 C1 80.53(16) . 3_565 ?
C1 Fe1 C11 93.33(13) . . ?
C1 Fe1 C11 93.33(13) 3_565 . ?
C1 Fe1 C12 86.69(13) . 3_565 ?
C1 Fe1 C12 130.45(12) 3_565 3_565 ?
C11 Fe1 C12 39.67(10) . 3_565 ?
C1 Fe1 C12 130.45(12) . . ?
C1 Fe1 C12 86.69(13) 3_565 . ?
C11 Fe1 C12 39.67(10) . . ?
C12 Fe1 C12 66.27(17) 3_565 . ?
C1 Fe1 C13 117.14(12) . 3_565 ?
C1 Fe1 C13 152.29(13) 3_565 3_565 ?
C11 Fe1 C13 65.90(14) . 3_565 ?
C12 Fe1 C13 39.10(12) 3_565 3_565 ?
C12 Fe1 C13 65.60(12) . 3_565 ?
C1 Fe1 C13 152.29(13) . . ?
C1 Fe1 C13 117.14(12) 3_565 . ?
C11 Fe1 C13 65.90(14) . . ?
C12 Fe1 C13 65.60(12) 3_565 . ?
C12 Fe1 C13 39.10(12) . . ?
C13 Fe1 C13 38.78(18) 3_565 . ?
C1 Fe1 P1 98.76(9) . . ?
C1 Fe1 P1 98.76(9) 3_565 . ?
C11 Fe1 P1 164.11(13) . . ?
C12 Fe1 P1 130.55(9) 3_565 . ?
C12 Fe1 P1 130.55(9) . . ?
C13 Fe1 P1 99.20(8) 3_565 . ?
C13 Fe1 P1 99.20(8) . . ?
C1 Fe1 Fe2 90.66(16) . 3_565 ?
C1 Fe1 Fe2 45.32(19) 3_565 3_565 ?
C11 Fe1 Fe2 137.03(17) . 3_565 ?
C12 Fe1 Fe2 175.47(19) 3_565 3_565 ?
C12 Fe1 Fe2 113.11(16) . 3_565 ?
C13 Fe1 Fe2 145.21(18) 3_565 3_565 ?
C13 Fe1 Fe2 117.01(16) . 3_565 ?
P1 Fe1 Fe2 53.51(16) . 3_565 ?
C1 Fe1 Fe2 45.32(19) . . ?
C1 Fe1 Fe2 90.66(16) 3_565 . ?
C11 Fe1 Fe2 137.03(17) . . ?
C12 Fe1 Fe2 113.11(16) 3_565 . ?
C12 Fe1 Fe2 175.47(19) . . ?
C13 Fe1 Fe2 117.01(15) 3_565 . ?
C13 Fe1 Fe2 145.21(18) . . ?
P1 Fe1 Fe2 53.51(16) . . ?
Fe2 Fe1 Fe2 67.1(3) 3_565 . ?
C1 Fe1 Mn1 84.90(17) . 3_565 ?
C1 Fe1 Mn1 47.62(19) 3_565 3_565 ?
C11 Fe1 Mn1 140.74(19) . 3_565 ?
C12 Fe1 Mn1 171.59(17) 3_565 3_565 ?
C12 Fe1 Mn1 119.63(16) . 3_565 ?
C13 Fe1 Mn1 147.40(19) 3_565 3_565 ?
C13 Fe1 Mn1 122.81(17) . 3_565 ?
P1 Fe1 Mn1 51.41(18) . 3_565 ?
Fe2 Fe1 Mn1 6.7(3) 3_565 3_565 ?
Fe2 Fe1 Mn1 60.49(6) . 3_565 ?
C1 Fe1 Mn1 47.62(19) . . ?
C1 Fe1 Mn1 84.90(17) 3_565 . ?
C11 Fe1 Mn1 140.74(19) . . ?
C12 Fe1 Mn1 119.63(16) 3_565 . ?
C12 Fe1 Mn1 171.59(17) . . ?
C13 Fe1 Mn1 122.81(17) 3_565 . ?
C13 Fe1 Mn1 147.40(19) . . ?
P1 Fe1 Mn1 51.41(17) . . ?
Fe2 Fe1 Mn1 60.49(6) 3_565 . ?
Fe2 Fe1 Mn1 6.7(3) . . ?
Mn1 Fe1 Mn1 53.8(3) 3_565 . ?
C41 P1 Fe1 136.21(12) . . ?
C41 P1 Mn1 135.0(2) . . ?
Fe1 P1 Mn1 77.5(2) . . ?
C41 P1 Mn1 135.0(2) . 3_565 ?
Fe1 P1 Mn1 77.5(2) . 3_565 ?
Mn1 P1 Mn1 68.9(4) . 3_565 ?
C41 P1 Fe2 133.37(19) . . ?
Fe1 P1 Fe2 73.50(17) . . ?
Mn1 P1 Fe2 8.8(3) . . ?
Mn1 P1 Fe2 75.95(8) 3_565 . ?
C41 P1 Fe2 133.37(19) . 3_565 ?
Fe1 P1 Fe2 73.50(17) . 3_565 ?
Mn1 P1 Fe2 75.95(8) . 3_565 ?
Mn1 P1 Fe2 8.8(3) 3_565 3_565 ?
Fe2 P1 Fe2 82.5(3) . 3_565 ?
O1 C1 Fe2 141.2(3) . . ?
O1 C1 Fe1 134.1(2) . . ?
Fe2 C1 Fe1 84.4(3) . . ?
O1 C1 Mn1 140.9(3) . . ?
Fe2 C1 Mn1 8.7(4) . . ?
Fe1 C1 Mn1 84.9(3) . . ?
O2 C2 Mn1 137.9(3) . 3_565 ?
O2 C2 Mn1 137.9(3) . . ?
Mn1 C2 Mn1 83.4(6) 3_565 . ?
O2 C2 Fe2 137.1(2) . . ?
Mn1 C2 Fe2 84.88(19) 3_565 . ?
Mn1 C2 Fe2 5.9(4) . . ?
O2 C2 Fe2 137.1(2) . 3_565 ?
Mn1 C2 Fe2 5.9(4) 3_565 3_565 ?
Mn1 C2 Fe2 84.87(19) . 3_565 ?
Fe2 C2 Fe2 85.8(5) . 3_565 ?
C12 C11 C12 107.8(4) . 3_565 ?
C12 C11 Fe1 70.60(18) . . ?
C12 C11 Fe1 70.60(18) 3_565 . ?
C12 C11 H11 126.1 . . ?
C12 C11 H11 126.1 3_565 . ?
Fe1 C11 H11 124.3 . . ?
C13 C12 C11 108.0(3) . . ?
C13 C12 Fe1 71.63(16) . . ?
C11 C12 Fe1 69.73(19) . . ?
C13 C12 H12 126 . . ?
C11 C12 H12 126 . . ?
Fe1 C12 H12 124.2 . . ?
C13 C13 C12 108.12(18) 3_565 . ?
C13 C13 Fe1 70.61(9) 3_565 . ?
C12 C13 Fe1 69.27(16) . . ?
C13 C13 H13 125.9 3_565 . ?
C12 C13 H13 125.9 . . ?
Fe1 C13 H13 125.8 . . ?
C2 Mn1 C1 82.0(4) . . ?
C2 Mn1 C23 120.0(6) . . ?
C1 Mn1 C23 86.4(4) . . ?
C2 Mn1 C25 87.3(5) . . ?
C1 Mn1 C25 142.0(6) . . ?
C23 Mn1 C25 67.7(5) . . ?
C2 Mn1 C24 86.3(6) . . ?
C1 Mn1 C24 102.9(6) . . ?
C23 Mn1 C24 40.0(5) . . ?
C25 Mn1 C24 39.8(5) . . ?
C2 Mn1 C22 150.4(5) . . ?
C1 Mn1 C22 112.2(4) . . ?
C23 Mn1 C22 40.5(5) . . ?
C25 Mn1 C22 65.3(5) . . ?
C24 Mn1 C22 65.7(5) . . ?
C2 Mn1 C21 121.3(4) . . ?
C1 Mn1 C21 150.1(5) . . ?
C23 Mn1 C21 66.2(5) . . ?
C25 Mn1 C21 37.5(5) . . ?
C24 Mn1 C21 64.1(6) . . ?
C22 Mn1 C21 38.4(4) . . ?
C2 Mn1 P1 103.8(4) . . ?
C1 Mn1 P1 98.3(3) . . ?
C23 Mn1 P1 136.1(6) . . ?
C25 Mn1 P1 119.7(5) . . ?
C24 Mn1 P1 157.7(6) . . ?
C22 Mn1 P1 99.8(4) . . ?
C21 Mn1 P1 93.9(4) . . ?
C2 Mn1 Mn1 48.3(3) . 3_565 ?
C1 Mn1 Mn1 92.0(2) . 3_565 ?
C23 Mn1 Mn1 168.3(5) . 3_565 ?
C25 Mn1 Mn1 107.7(4) . 3_565 ?
C24 Mn1 Mn1 129.8(5) . 3_565 ?
C22 Mn1 Mn1 148.7(3) . 3_565 ?
C21 Mn1 Mn1 117.3(3) . 3_565 ?
P1 Mn1 Mn1 55.57(18) . 3_565 ?
C2 Mn1 Fe1 89.8(3) . . ?
C1 Mn1 Fe1 47.45(18) . . ?
C23 Mn1 Fe1 122.4(4) . . ?
C25 Mn1 Fe1 169.2(5) . . ?
C24 Mn1 Fe1 150.3(6) . . ?
C22 Mn1 Fe1 119.2(3) . . ?
C21 Mn1 Fe1 139.7(4) . . ?
P1 Mn1 Fe1 51.08(17) . . ?
Mn1 Mn1 Fe1 63.09(13) 3_565 . ?
C25 C21 C22 111.1(8) . . ?
C25 C21 Mn1 69.7(6) . . ?
C22 C21 Mn1 70.5(4) . . ?
C25 C21 H21 124.5 . . ?
C22 C21 H21 124.5 . . ?
Mn1 C21 H21 127 . . ?
C21 C22 C23 107.5(8) . . ?
C21 C22 Mn1 71.1(4) . . ?
C23 C22 Mn1 68.5(6) . . ?
C21 C22 H22 126.3 . . ?
C23 C22 H22 126.3 . . ?
Mn1 C22 H22 125.7 . . ?
C21 C25 C26 127.7(11) . . ?
C21 C25 C24 107.2(11) . . ?
C26 C25 C24 123.3(11) . . ?
C21 C25 Mn1 72.8(6) . . ?
C26 C25 Mn1 133.9(10) . . ?
C24 C25 Mn1 70.1(7) . . ?
C25 C24 C23 109.4(12) . . ?
C25 C24 Mn1 70.1(7) . . ?
C23 C24 Mn1 69.9(6) . . ?
C25 C24 H24 125.3 . . ?
C23 C24 H24 125.3 . . ?
Mn1 C24 H24 126.3 . . ?
C24 C23 C22 104.6(10) . . ?
C24 C23 Mn1 70.1(7) . . ?
C22 C23 Mn1 71.0(6) . . ?
C24 C23 H23 127.7 . . ?
C22 C23 H23 127.7 . . ?
Mn1 C23 H23 123 . . ?
C1 Fe2 C2 79.2(3) . . ?
C1 Fe2 C31 95.7(5) . . ?
C2 Fe2 C31 94.1(6) . . ?
C1 Fe2 C32 87.4(4) . . ?
C2 Fe2 C32 130.6(5) . . ?
C31 Fe2 C32 39.9(5) . . ?
C1 Fe2 C34 152.3(5) . . ?
C2 Fe2 C34 119.7(4) . . ?
C31 Fe2 C34 64.8(5) . . ?
C32 Fe2 C34 65.0(4) . . ?
C1 Fe2 P1 103.2(3) . . ?
C2 Fe2 P1 95.3(3) . . ?
C31 Fe2 P1 160.1(5) . . ?
C32 Fe2 P1 134.1(4) . . ?
C34 Fe2 P1 95.3(4) . . ?
C1 Fe2 C33 116.5(3) . . ?
C2 Fe2 C33 153.7(4) . . ?
C31 Fe2 C33 64.7(5) . . ?
C32 Fe2 C33 38.2(3) . . ?
C34 Fe2 C33 38.5(3) . . ?
P1 Fe2 C33 100.8(3) . . ?
C1 Fe2 C35 131.5(6) . . ?
C2 Fe2 C35 87.8(4) . . ?
C31 Fe2 C35 38.5(6) . . ?
C32 Fe2 C35 66.5(5) . . ?
C34 Fe2 C35 40.0(5) . . ?
P1 Fe2 C35 124.6(5) . . ?
C33 Fe2 C35 65.9(5) . . ?
C1 Fe2 Fe1 50.28(19) . . ?
C2 Fe2 Fe1 87.6(3) . . ?
C31 Fe2 Fe1 145.1(5) . . ?
C32 Fe2 Fe1 118.9(4) . . ?
C34 Fe2 Fe1 141.7(4) . . ?
P1 Fe2 Fe1 52.99(17) . . ?
C33 Fe2 Fe1 118.7(3) . . ?
C35 Fe2 Fe1 174.5(5) . . ?
C1 Fe2 Fe2 85.7(2) . 3_565 ?
C2 Fe2 Fe2 47.1(2) . 3_565 ?
C31 Fe2 Fe2 140.4(5) . 3_565 ?
C32 Fe2 Fe2 173.0(3) . 3_565 ?
C34 Fe2 Fe2 121.9(4) . 3_565 ?
P1 Fe2 Fe2 48.75(17) . 3_565 ?
C33 Fe2 Fe2 147.5(3) . 3_565 ?
C35 Fe2 Fe2 118.1(4) . 3_565 ?
Fe1 Fe2 Fe2 56.44(13) . 3_565 ?
C35 C31 C32 111.5(11) . . ?
C35 C31 Fe2 73.2(8) . . ?
C32 C31 Fe2 71.5(7) . . ?
C35 C31 H31 124.3 . . ?
C32 C31 H31 124.3 . . ?
Fe2 C31 H31 122.6 . . ?
C33 C32 C31 106.1(9) . . ?
C33 C32 Fe2 71.7(5) . . ?
C31 C32 Fe2 68.6(8) . . ?
C33 C32 H32 126.9 . . ?
C31 C32 H32 126.9 . . ?
Fe2 C32 H32 124.4 . . ?
C32 C33 C34 109.3(8) . . ?
C32 C33 Fe2 70.1(5) . . ?
C34 C33 Fe2 70.4(5) . . ?
C32 C33 H33 125.3 . . ?
C34 C33 H33 125.3 . . ?
Fe2 C33 H33 125.8 . . ?
C33 C34 C35 108.6(9) . . ?
C33 C34 Fe2 71.1(6) . . ?
C35 C34 Fe2 70.5(7) . . ?
C33 C34 H34 125.7 . . ?
C35 C34 H34 125.7 . . ?
Fe2 C34 H34 124.3 . . ?
C31 C35 C34 104.5(11) . . ?
C31 C35 Fe2 68.3(7) . . ?
C34 C35 Fe2 69.5(6) . . ?
C31 C35 H35 127.8 . . ?
C34 C35 H35 127.8 . . ?
Fe2 C35 H35 126 . . ?
C42 C41 C42 110.5(4) 3_565 . ?
C42 C41 P1 112.2(2) 3_565 . ?
C42 C41 P1 112.2(2) . . ?
C42 C41 H41 107.2 3_565 . ?
C42 C41 H41 107.2 . . ?
P1 C41 H41 107.2 . . ?
C41 C42 C43 111.0(3) . . ?
C41 C42 H42A 109.4 . . ?
C43 C42 H42A 109.4 . . ?
C41 C42 H42B 109.4 . . ?
C43 C42 H42B 109.4 . . ?
H42A C42 H42B 108 . . ?
C44 C43 C42 111.8(4) . . ?
C44 C43 H43A 109.2 . . ?
C42 C43 H43A 109.2 . . ?
C44 C43 H43B 109.2 . . ?
C42 C43 H43B 109.2 . . ?
H43A C43 H43B 107.9 . . ?
C43 C44 C43 111.0(4) . 3_565 ?
C43 C44 H44A 109.4 . . ?
C43 C44 H44A 109.4 3_565 . ?
C43 C44 H44B 109.4 . . ?
C43 C44 H44B 109.4 3_565 . ?
H44A C44 H44B 108 . . ?
 
#===END
 
